# Supplementary material for: Experimental and theoretical comprehension of ESIPT fluorophores based on a 2-(2′-hydroxyphenyl)-3,3′-dimethylindole (HDMI) scaffold
Source: Royal Society of Chemistry journal article supplement (doi:10.1039/d4sc01937g), 2024-01-01
Supplement: d4sc01937g1.pdf [file d4sc01937g1.pdf]

## SUPPORTING INFORMATION

### **Experimental and Theoretical Comprehension of ESIPT Fluorophores Based on a 2-(2'-Hydroxyphenyl)-3,3'-Dimethylindole (HDMI) Scaffold**

Timothée Stoerkler,<sup>[a]</sup> # Gilles Ulrich,<sup>[a]</sup> Pascal Retailleau,<sup>[b]</sup> Adèle D. Laurent,<sup>[c]</sup> Denis Jacquemin,<sup>[c][d]\*</sup>  
and Julien Massue<sup>[a]\*</sup>

<sup>[a]</sup> Institut de Chimie et Procédés pour l'Energie, l'Environnement et la Santé (ICPEES), Equipe Chimie Organique pour la Biologie, les Matériaux et l'Optique (COMBO), UMR CNRS 7515, Ecole Européenne de Chimie, Polymères et Matériaux (ECPM), 25 Rue Becquerel, 67087 Strasbourg Cedex 02, France

# Present address : University of Ottawa, Department of Chemistry, D'Iorio Hall, 10 Marie Curie, Ottawa ON Canada, K1N 6N5

<sup>[b]</sup> Service de Cristallographie Structurale, ICSN-CNRS, Université Paris-Saclay, 1 Avenue de la Terrasse, Bât. 27, 91198 Gif-sur-Yvette Cedex, France

<sup>[c]</sup> Nantes Université, CNRS, CEISAM UMR 6230, F-44000 Nantes, France

<sup>[d]</sup> Institut Universitaire de France (IUF), F-75005, Paris, France

Emails: [Denis.Jacquemin@univ-nantes.fr](mailto:Denis.Jacquemin@univ-nantes.fr), [massue@unistra.fr](mailto:massue@unistra.fr)

## Table of Content

S1 Materials and methods p.S3

S2  $^1\text{H}$  and  $^{13}\text{C}$  NMR spectra, p.S4

S3. X-Ray diffraction data, p.S14

S4. Photophysical data, p.S18

S5 Theoretical methods and data, p.S27

S6 References, p.S62

## S1. Materials and methods

All commercially available chemicals were received from Sigma Aldrich or Fluorochem. Thin layer chromatographies (TLC) were performed on silica gel coated with a fluorescent indicator. Purifications by column chromatography were conducted using 40-63  $\mu\text{m}$  silica gel.

$^1\text{H}$  NMR (400 or 500 MHz) and  $^{13}\text{C}$  NMR (100 or 126 MHz) spectra were recorded on a Bruker Advance spectrometer with deuterated solvents. Mass spectrometry analysis was performed by direct sample injection on a electrospray ionization time-of-flight (ESI-TOF) micrOTOF II mass spectrometer. Absorption spectra were recorded using a dual-beam grating Shimadzu UV-3000 absorption spectrometer with a quartz cuvette of 1 cm of optical path length. The steady-state fluorescence emission and excitation spectra were recorded by using a Horiba S2 Jobin Yvon Fluoromax 4. All fluorescence were corrected. Solvents for spectroscopy were spectroscopic grade. Potassium bromide was stored in a drying cabinet.

## S2. $^1\text{H}$ and $^{13}\text{C}$ NMR spectra

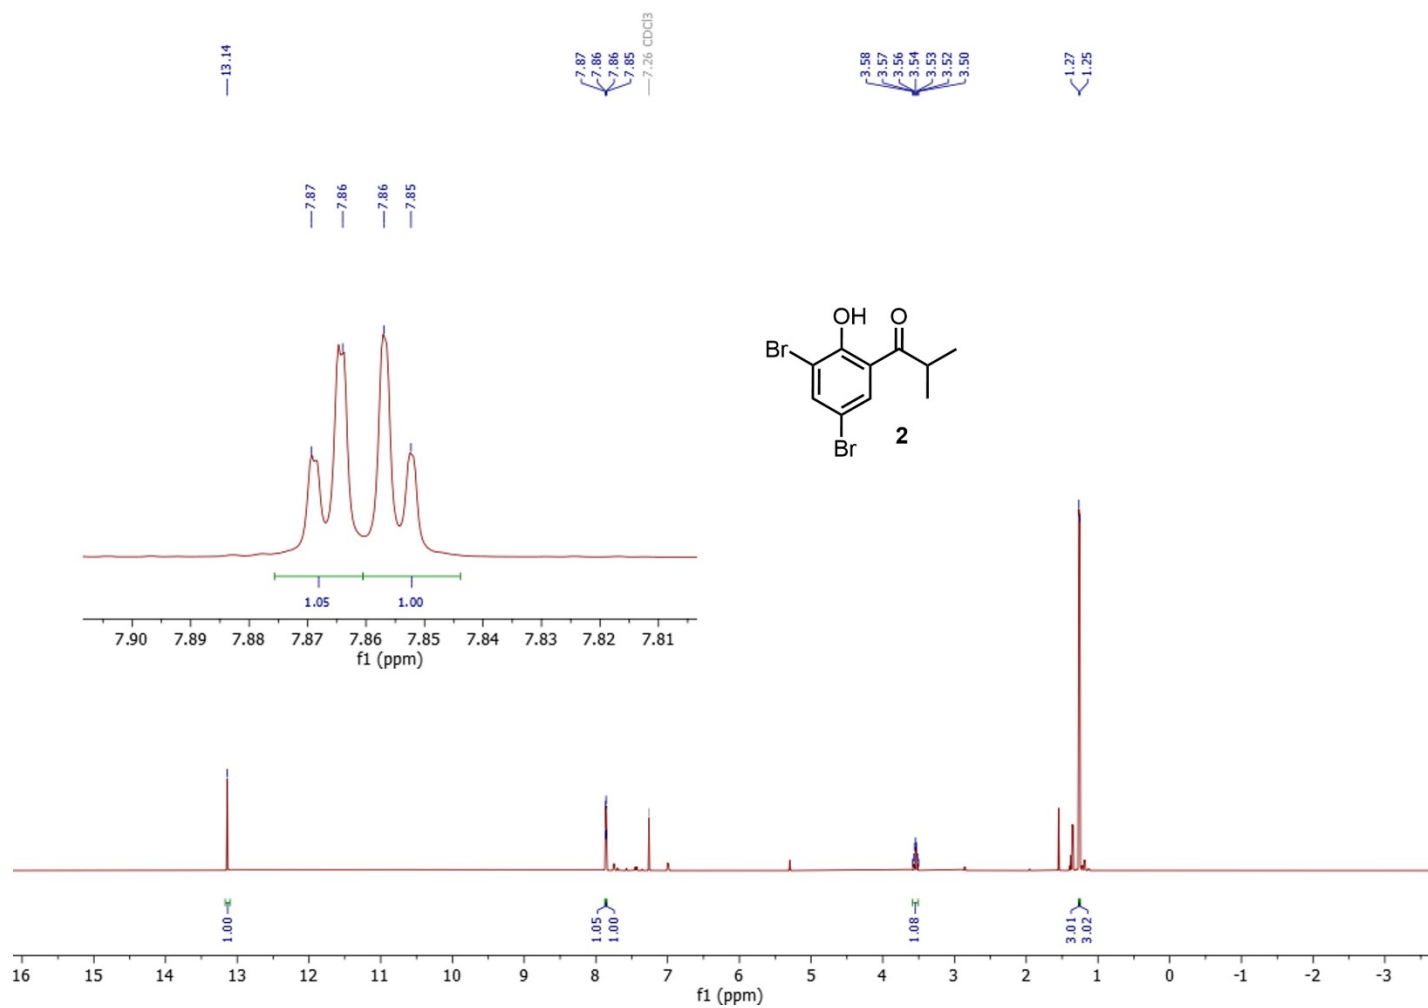

Figure S1.  $^1\text{H}$  NMR spectrum of **2**

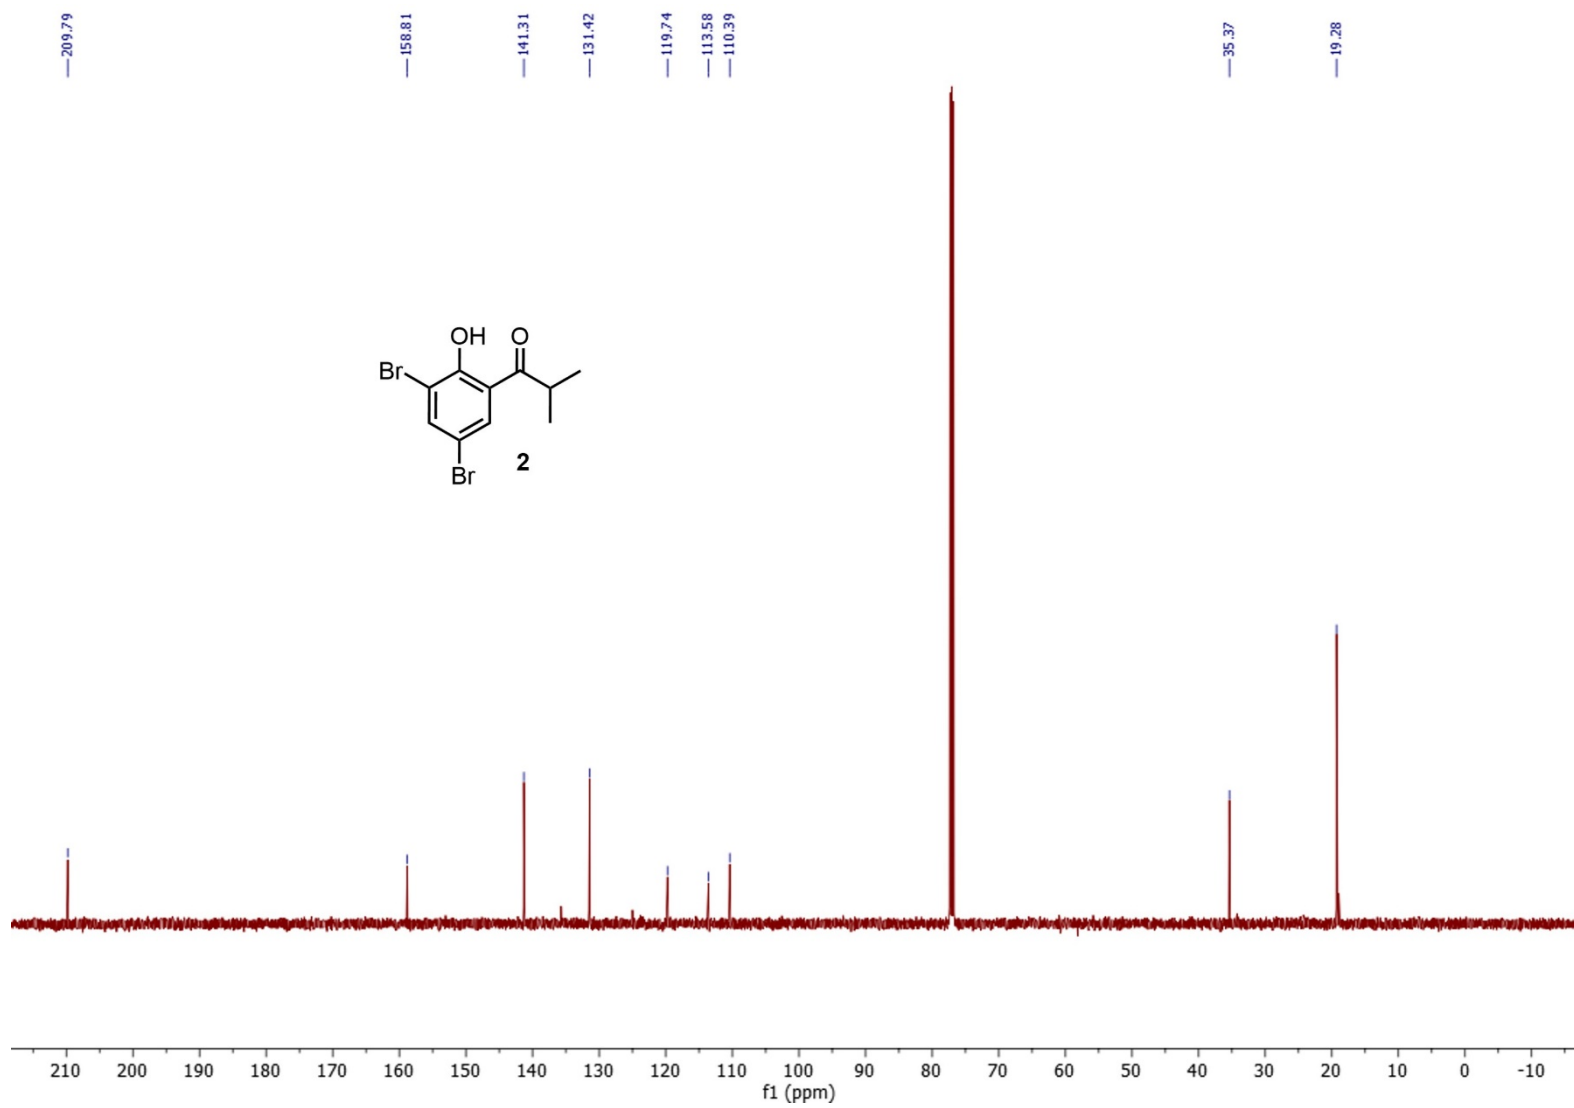

Figure S2. <sup>13</sup>C NMR spectrum of **2**

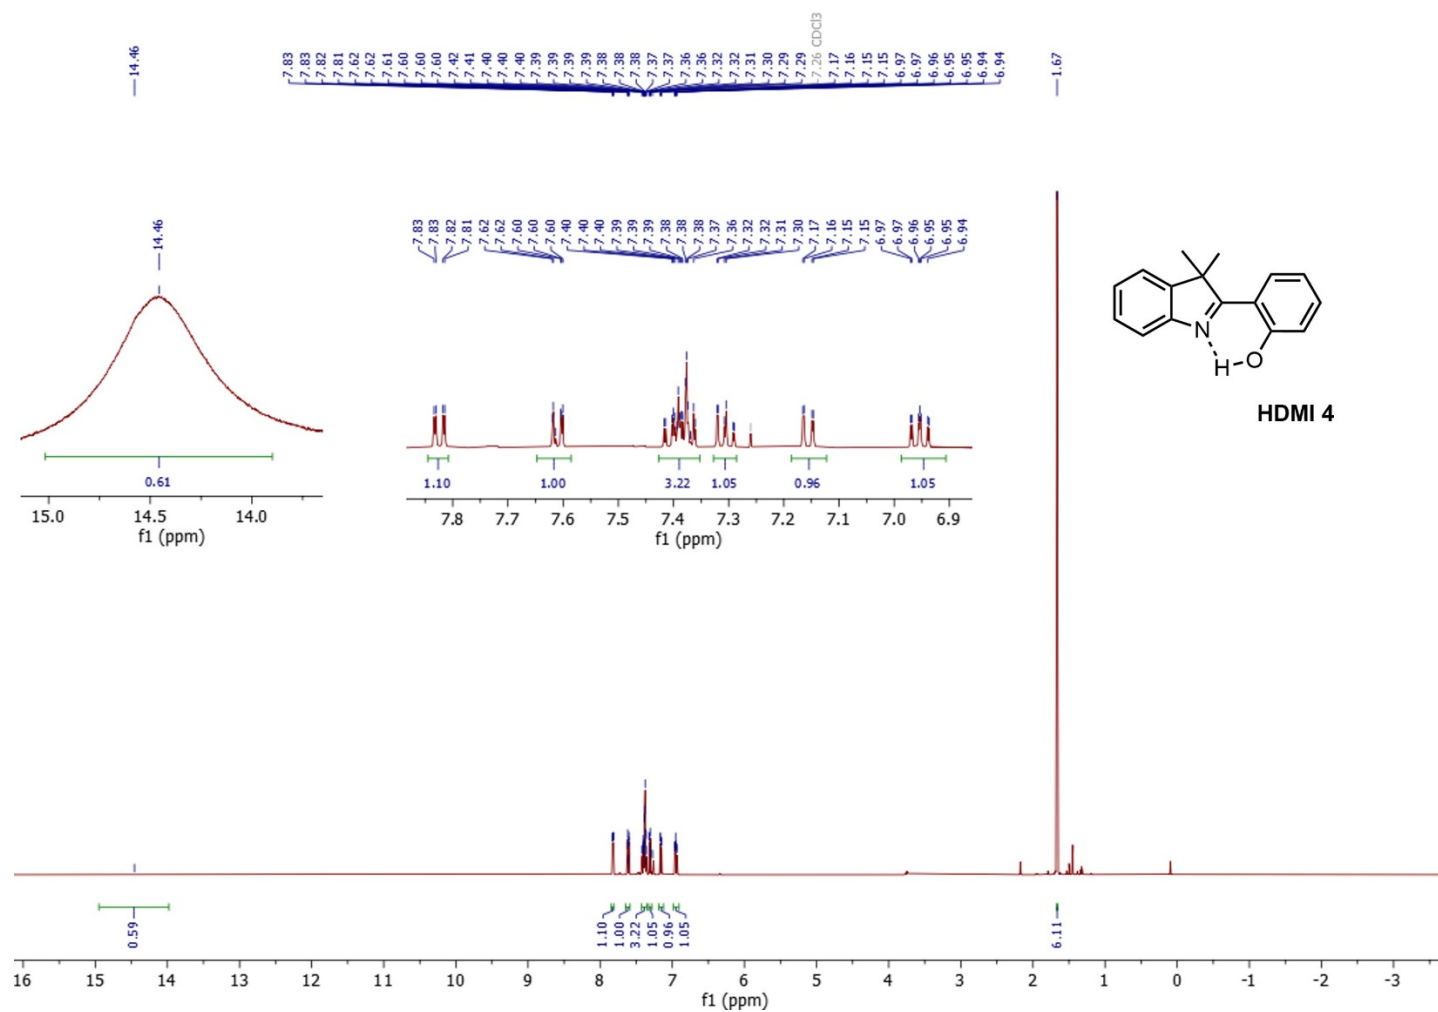

**Figure S3. <sup>1</sup>H NMR spectrum of HDMI 2**

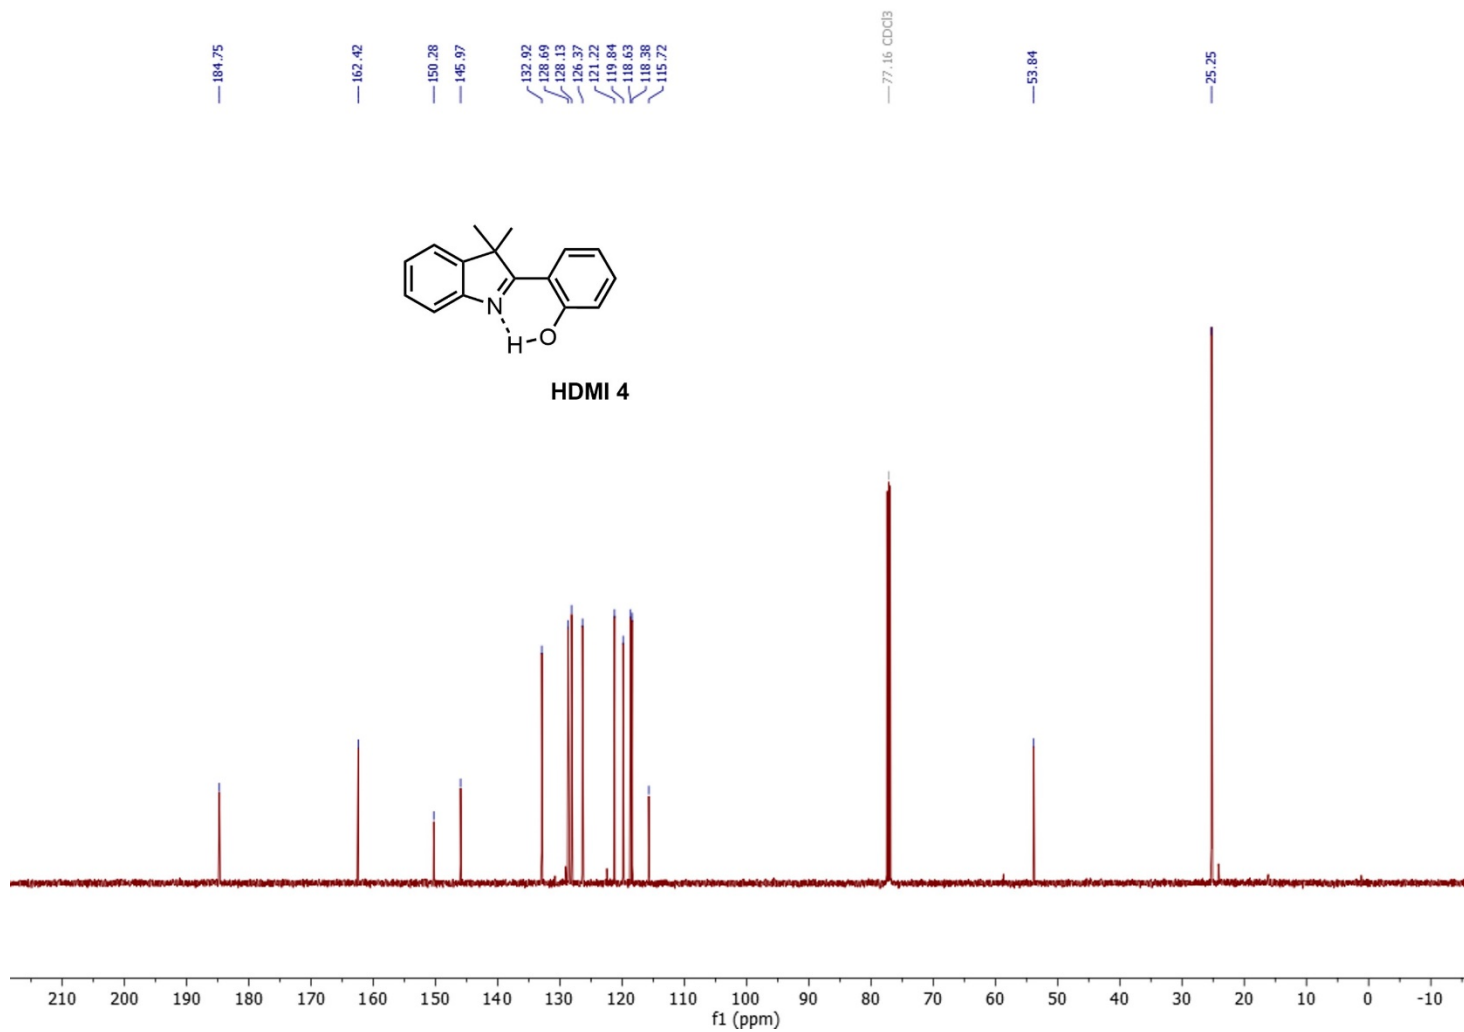

Figure S4. <sup>13</sup>C NMR spectrum of HDMI 2

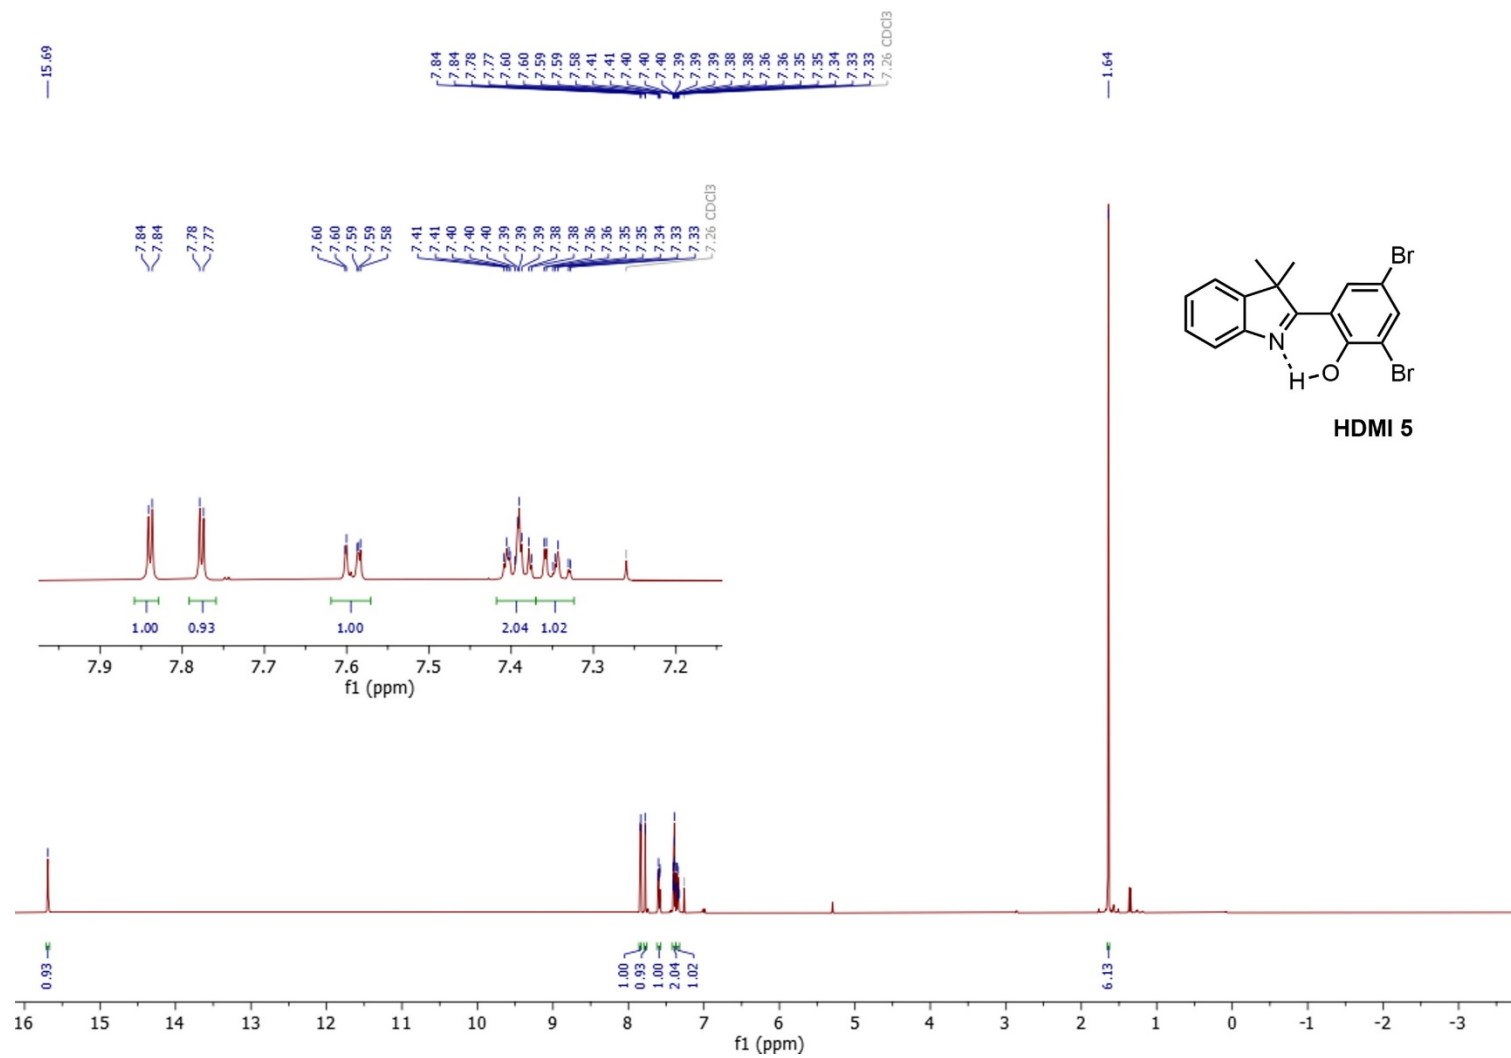

**Figure S5.** <sup>1</sup>H NMR spectrum of **HDMI 5**



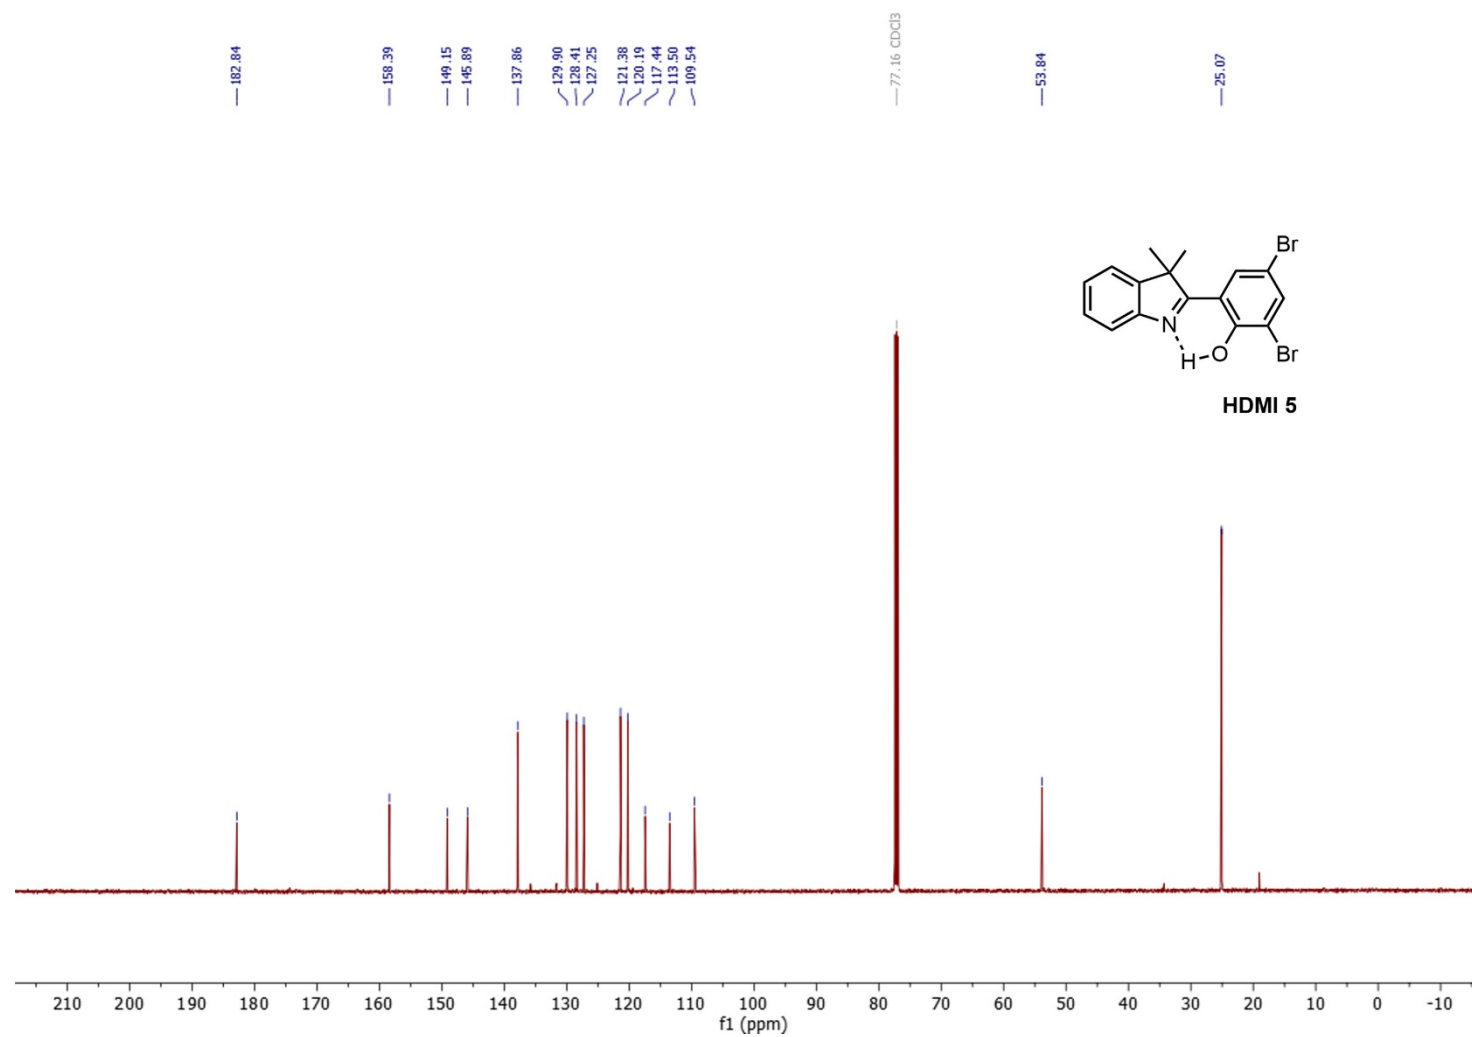

Figure S6. <sup>13</sup>C NMR spectrum of HDMI 5

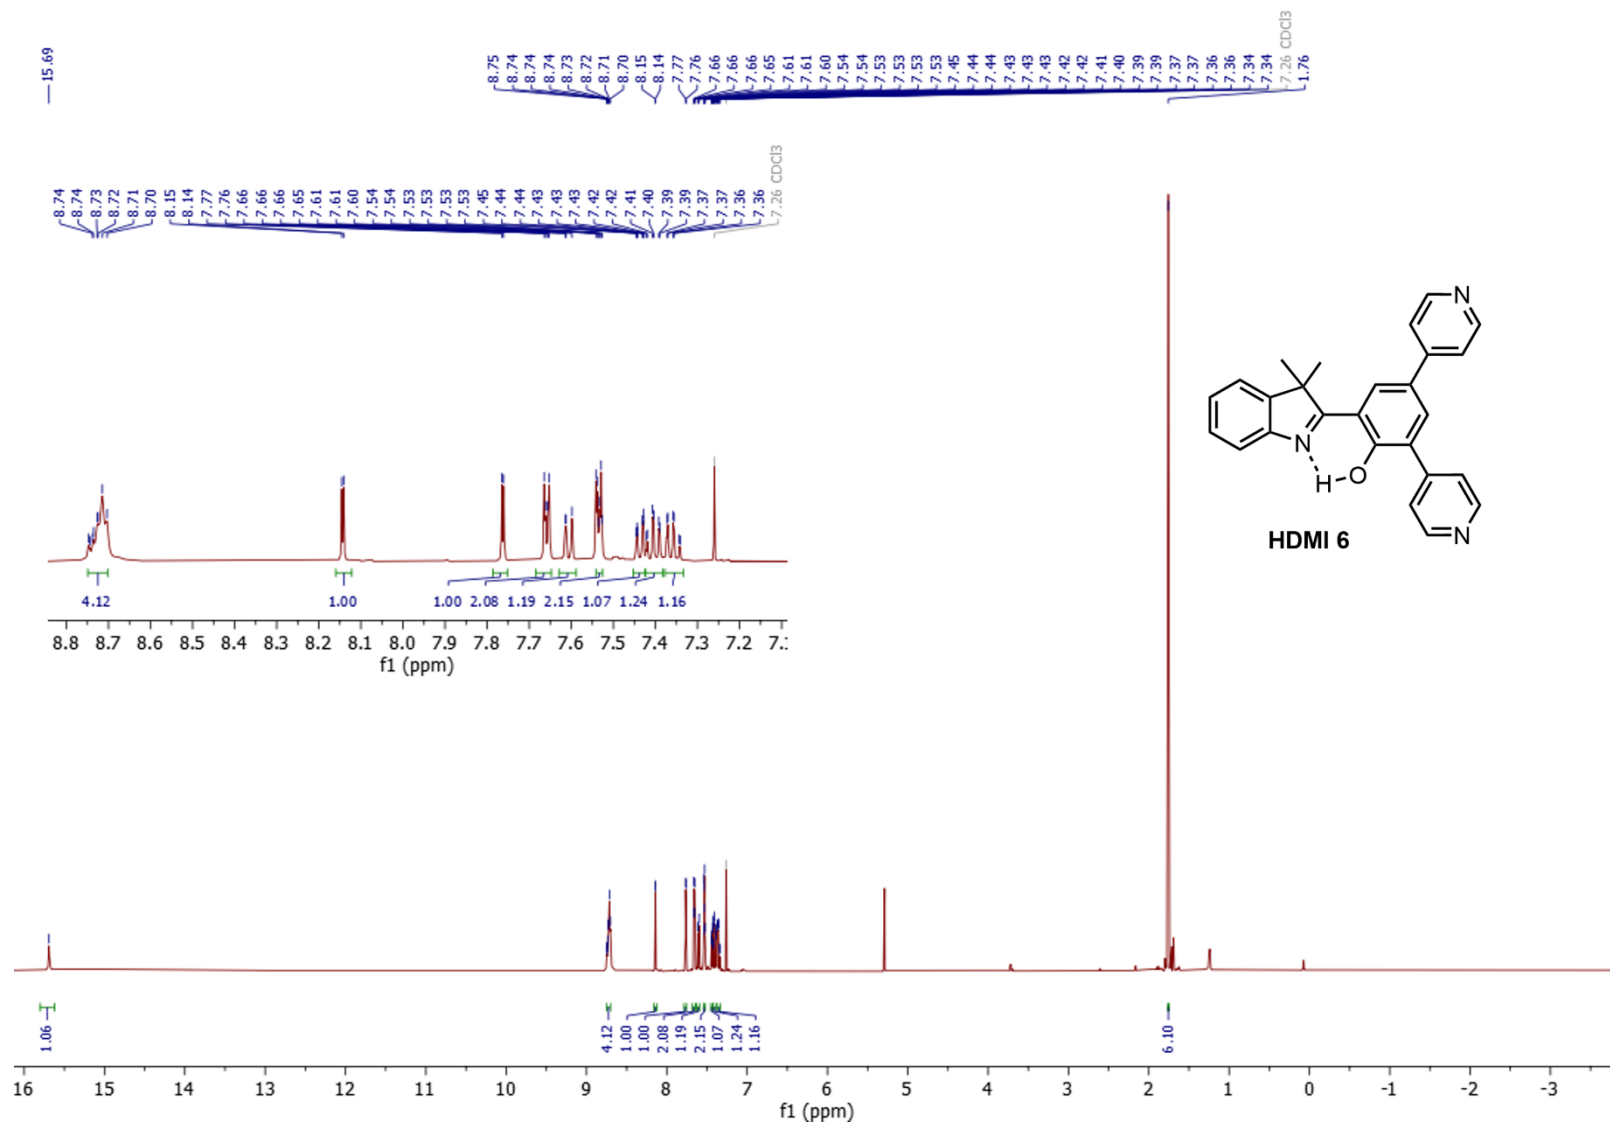

**Figure S7.** <sup>1</sup>H NMR spectrum of **HDMI 6**

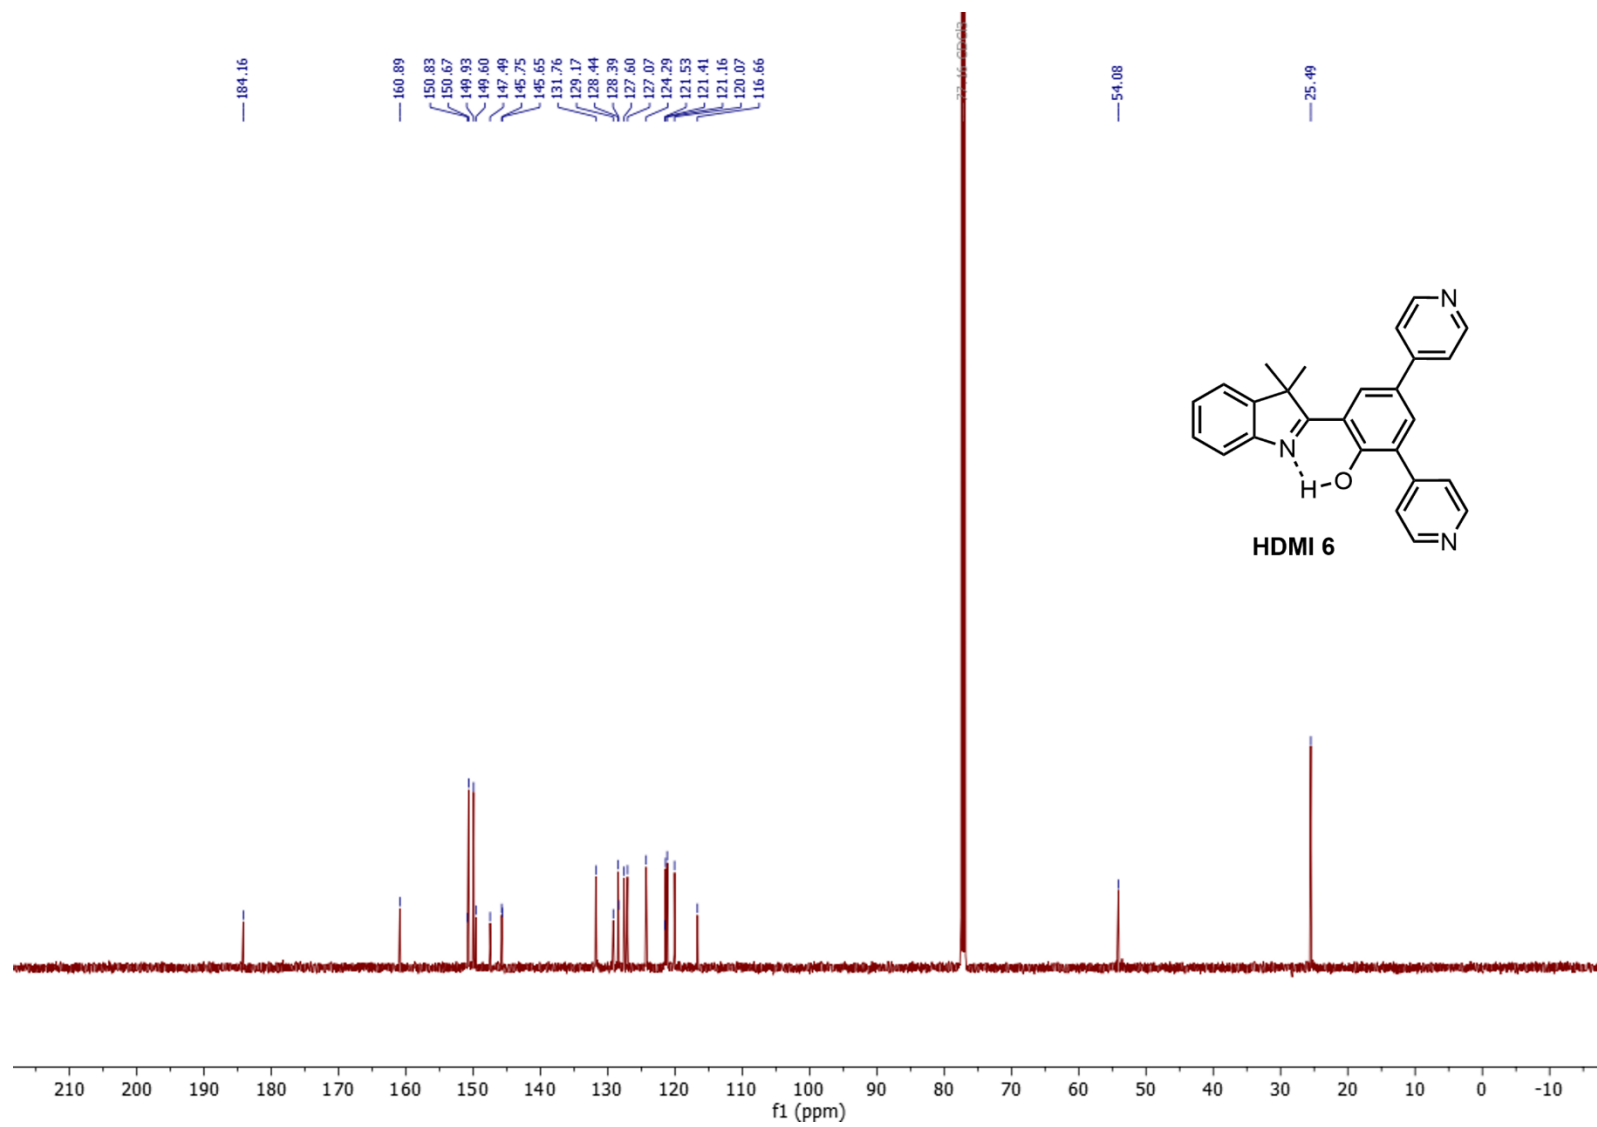

Figure S8.  $^{13}\text{C}$  NMR spectrum of HDMI 6

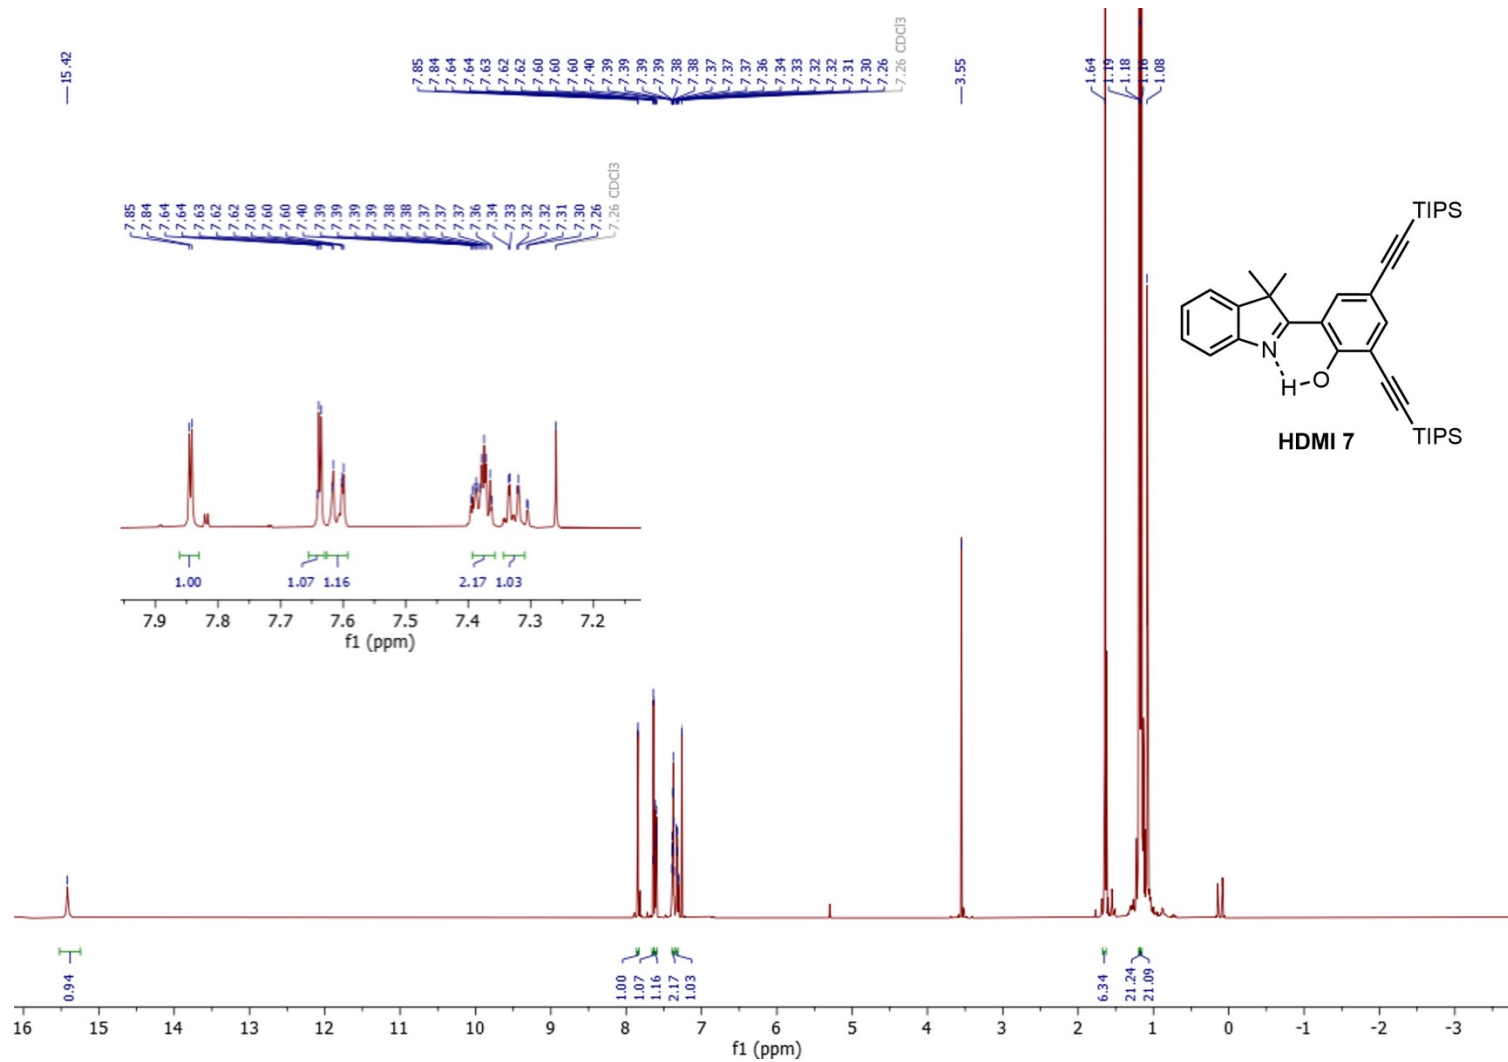

Figure S9. <sup>1</sup>H NMR spectrum of HDMI 7

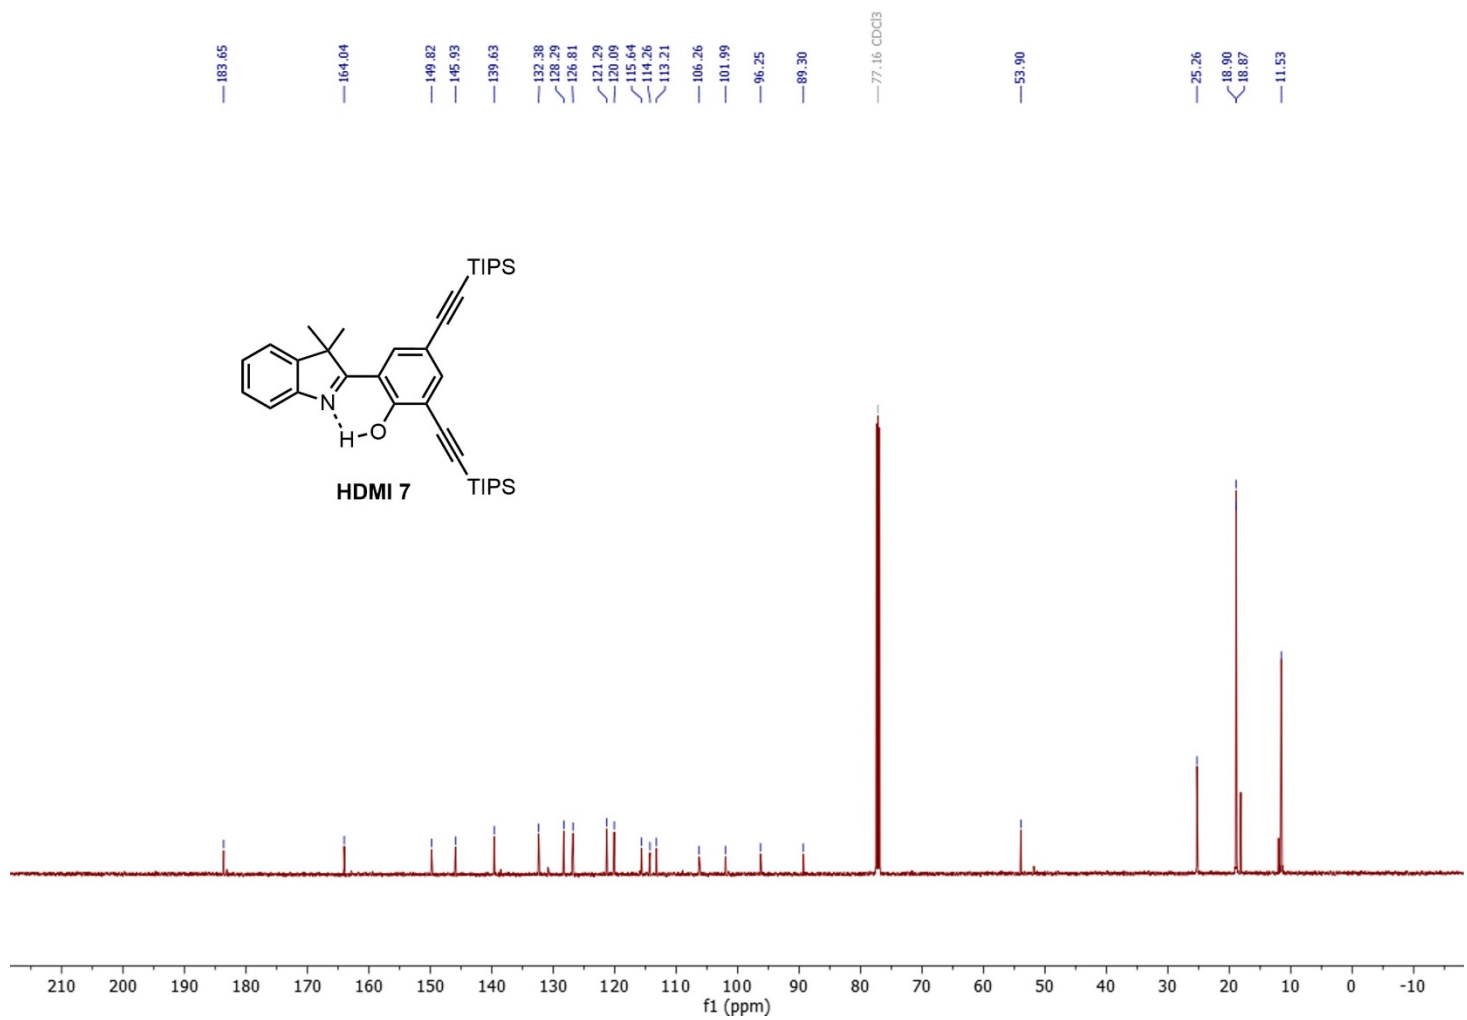

Figure S10. <sup>13</sup>C NMR spectrum of HDMI 7

### S3. X-Ray diffraction data

Crystals suitable to Single Crystal X-ray Diffraction analyses were obtained for HDMI **5** and **6** by slow evaporation from dichloromethane/methanol solutions. Shortlisted samples cleaned and isolated in Paratone® oil were transferred upon an appropriate nylon loop for X-ray Mo( $K\alpha$ ) irradiation under a liquid nitrogen flow at 173K. The diffractometer used was a RIGAKU XtaLABPro equipped with a microfocus sealed tube generator coupled to a double-bounce confocal Max-Flux® multilayer optic and a HPAD PILATUS3R 200K detector *CrysAlisPro 1.171.42.90a*<sup>1</sup> was employed for the data strategy collection and data reduction applying an empirical absorption correction using spherical harmonics, implemented in the SCALE3 ABSPACK<sup>1</sup> scaling algorithm, combined with a numerical absorption correction based on Gaussian integration over a multifaceted crystal model. Both structures were readily solved by intrinsic phasing methods (*SHELXT* program),<sup>2</sup> then refined according to the canonical Independent-atom model (IAM) by full-matrix least-squares methods on  $F^2$  using *SHELX-L*.<sup>3</sup> Thermal parameters for all non-hydrogen atoms were refined anisotropically and all the hydrogen atoms could be located in the difference Fourier maps. The final structure refinements for HDMI **5** and **6** were carried out by Hirshfeld Atom Refinement (HAR) with non-spherical atomic form factors using *NoSpherA2*<sup>4</sup> partitioning in *OLEX2*<sup>5</sup> based on electron density from iterative single-determinant SCF single-point DFT calculations using *ORCA* (version 5.0)<sup>6</sup> with a *R2SCAN* functional<sup>7</sup> and a *def2-TZVPP*<sup>8</sup> or cc-pVTZ basis set,<sup>9</sup> for **5** and **6** respectively. ISOR instruction was applied to restrain few hydrogen anisotropic displacement parameters in **5**. However, HAR refinement allowed the hydrogen atoms to be anisotropically refined in position, with also some similarity restraints on distances (concerning the aromatic H in **5**) comparable to those obtained by neutron diffraction. In addition, enhanced rigid-bond restraints (RIGU command) were also applied to the atoms of the two pyridine groups in **6**.

Crystal data, data collection and structure refinement details are summarized in Table S1. CCDC 2260125- 2260126 (for **5** and **6**, respectively) contain the supplementary crystallographic data for this paper. These data can be obtained free of charge from the Cambridge Crystallographic Data Centre via [www.ccdc.cam.ac.uk/data\\_request/cif](http://www.ccdc.cam.ac.uk/data_request/cif).

**Table S1.** Crystal data and structure refinement for HDMI dyes **5** and **6**.

| Identification code                     |                      | HDMI 5                                                                            | HDMI 6                                                                              |
|-----------------------------------------|----------------------|-----------------------------------------------------------------------------------|-------------------------------------------------------------------------------------|
|                                         |                      | 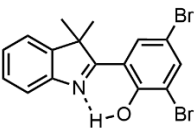 |  |
| Empirical formula                       |                      | C <sub>16</sub> H <sub>13</sub> Br <sub>2</sub> NO                                | C <sub>26</sub> H <sub>21</sub> N <sub>3</sub> O                                    |
| Formula weight                          |                      | 395.09                                                                            | 391.48                                                                              |
| Temperature                             | (K)                  | 173.0 (2)                                                                         |                                                                                     |
| Diffractionmeter                        | Rigaku®              | XtaLABPro mm003 Pilatus 200 K                                                     |                                                                                     |
| Wavelength                              | (Å)                  | 0.71073                                                                           |                                                                                     |
| Crystal system,<br>Space group          |                      | Monoclinic,<br>P 2 <sub>1</sub> /m                                                | Triclinic,<br>P -1                                                                  |
| Unit cell dimensions                    | (Å)                  | 8.6747(5)<br>6.9706(5)<br>12.3186(6)                                              | 8.50238(18)<br>10.0282(2)<br>12.6916(3)                                             |
|                                         | (°)                  | 90<br>107.234(6)<br>90                                                            | 70.6975(19)<br>89.7069(17)<br>85.8279(17)                                           |
| Volume                                  | (Å <sup>3</sup> )    | 711.44(8)                                                                         | 1018.39                                                                             |
| Z,                                      |                      | 2,                                                                                | 2,                                                                                  |
| Calculated density                      | (Mg/m <sup>3</sup> ) | 1.844                                                                             | 1.277                                                                               |
| Absorption coefficient                  | (mm <sup>-1</sup> )  | 5.690                                                                             | 0.079                                                                               |
| F(000)                                  |                      | 388                                                                               | 412                                                                                 |
| Crystal size                            | (mm)                 | 0.12 x 0.07 x 0.05                                                                | 0.27 x 0.19 x 0.17                                                                  |
| θ range for data collection             | (°)                  | 2.55 to 28.68                                                                     | 3.11 to 28.70                                                                       |
| Limiting indices                        |                      | -12 ≤ h ≤ 13,<br>-10 ≤ k ≤ 10,<br>-18 ≤ l ≤ 18                                    | -12 ≤ h ≤ 12,<br>-15 ≤ k ≤ 13,<br>-19 ≤ l ≤ 17                                      |
| Reflections collected / unique          |                      | 17279 / 1983                                                                      | 39300 / 5266                                                                        |
| Rint                                    |                      | 0.048                                                                             | 0.028                                                                               |
| Completeness to θ <sub>max</sub> =25.2° | (%)                  | 99.9                                                                              | 99.8                                                                                |
| Absorption correction                   |                      | Semi-empirical from equivalents & Gaussian                                        |                                                                                     |
| Max. and min. transmission              |                      | 1.000 and 0.138                                                                   | 1.000 and 0.554                                                                     |
| Refinement method                       |                      | Full-matrix least-squares on F <sup>2</sup>                                       |                                                                                     |
| Data / restraints / parameters          |                      | 1983 / 18 / 187                                                                   | 5266 / 72 / 461                                                                     |
| Goodness-of-fit on F <sup>2</sup>       |                      | 1.035                                                                             | 1.071                                                                               |
| Final R indices [I>2σ(I)]               | R1,<br>wR2           | 0.0199,<br>0.0326                                                                 | 0.0153,<br>0.0325                                                                   |
| R indices (all data)                    | R1,<br>wR2           | 0.0331,<br>0.0347                                                                 | 0.0200,<br>0.0336                                                                   |
| Extinction coefficient                  |                      | -                                                                                 | 0.008(7)                                                                            |
| Largest diff. peak and hole             | e.Å <sup>-3</sup>    | 0.411 and -0.587                                                                  | 0.111 and -0.125                                                                    |
| CCDC deposit number                     |                      | 2260125                                                                           | 2260126                                                                             |

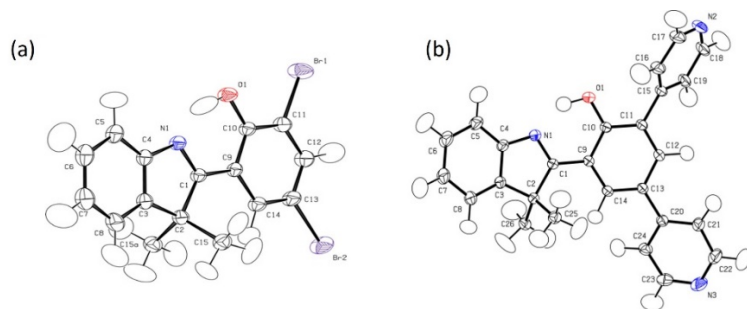

**Figure S11.** ORTEP drawings of (a) HDMI **5** and (b) HDMI **6**. Intramolecular hydrogen bond characteristics, for **5**:  $d(\text{O}_1\text{--H}_1) = 1.01(3)\text{\AA}$ ;  $d(\text{O}_1\dots\text{N}_1) = 2.563(2)\text{\AA}$ ;  $d(\text{H}_1\dots\text{N}_1) = 1.63(3)\text{\AA}$ ;  $\angle\text{O}_1\text{--H}_1\dots\text{N}_1 = 152(3)^\circ$  and for **6**:  $d(\text{O}_1\text{--H}_1) = 1.009(7)\text{\AA}$ ;  $d(\text{O}_1\dots\text{N}_1) = 2.5363(3)\text{\AA}$ ;  $d(\text{H}_1\dots\text{N}_1) = 1.621(6)\text{\AA}$ ;  $\angle\text{O}_1\text{--H}_1\dots\text{N}_1 = 148.4(6)^\circ$ .

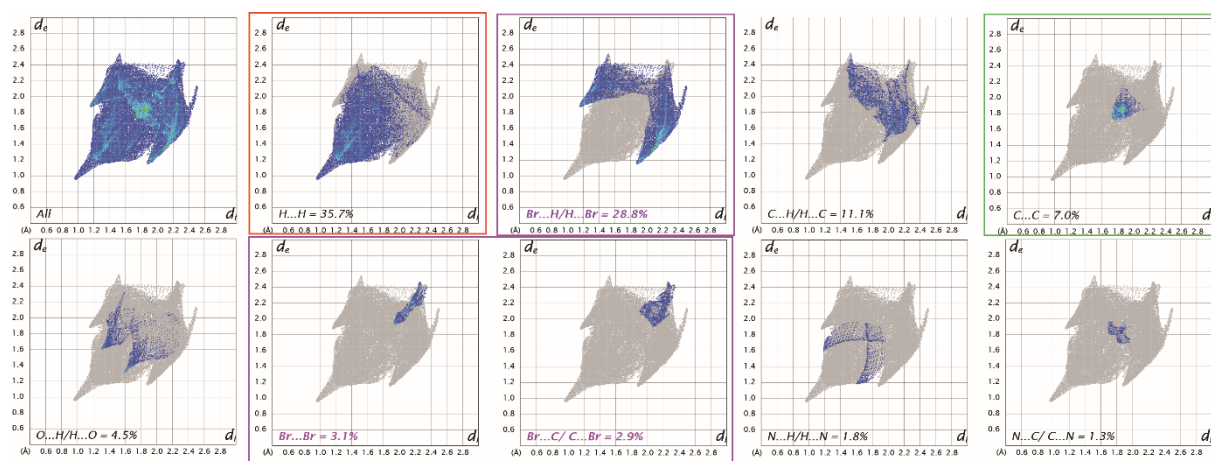

**Figure S12.** Full two-dimensional fingerprint plot for **5**, and those delineated into  $\text{H}\cdots\text{H}$ ,  $\text{Br}\cdots\text{H}/\text{H}\cdots\text{Br}$ ,  $\text{C}\cdots\text{H}/\text{H}\cdots\text{C}$ ,  $\text{C}\cdots\text{C}$ ,  $\text{Br}\cdots\text{Br}$ ,  $\text{Br}\cdots\text{C}/\text{C}\cdots\text{Br}$ ,  $\text{N}\cdots\text{H}/\text{H}\cdots\text{N}$ , and  $\text{N}\cdots\text{C}/\text{C}\cdots\text{N}$  contacts.



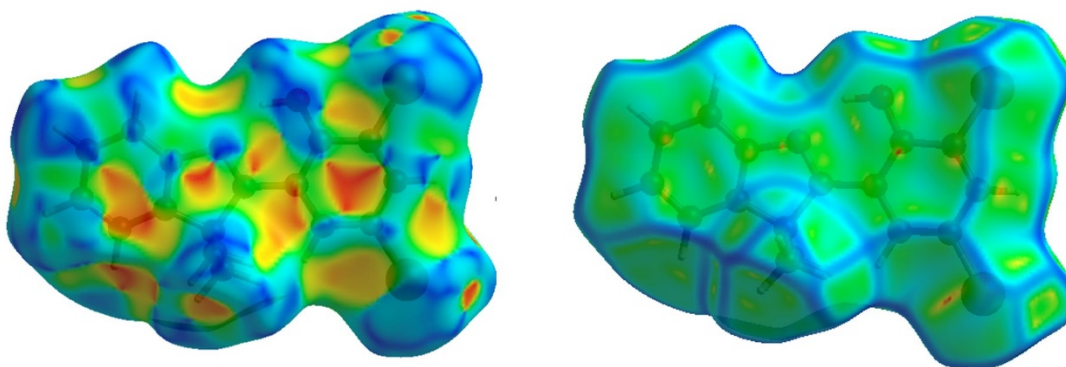

**Figure S13.** Two views of the Hirshfeld surface for **5** mapped over the shape-index property (left). The  $\pi$ - $\pi$  stacking between the rings is indicated by the appearance of blue regions surrounding bright-red spots within the indol and phenol rings-, and over curvedness (right) - evident as the flat region outlined in blue that encompasses the indol-phenol platform.

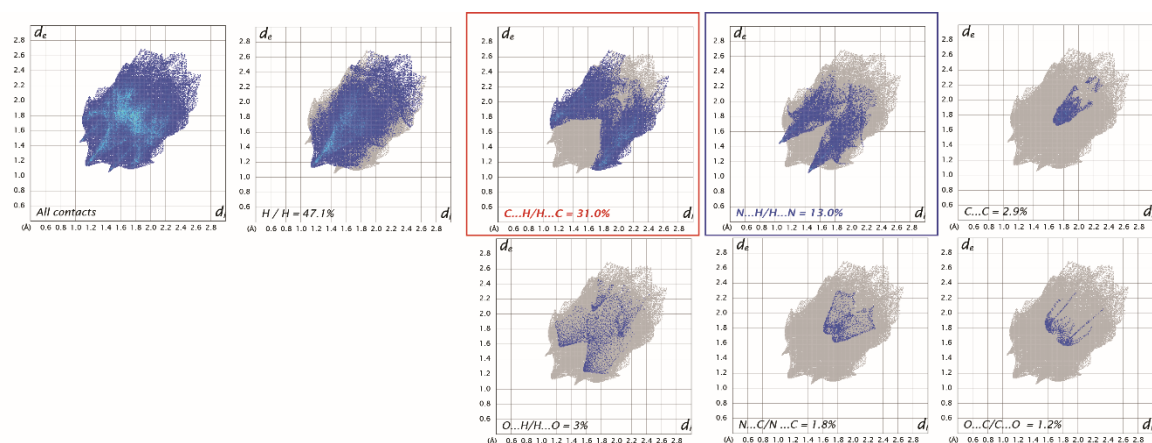

**Figure S14.** Full two-dimensional fingerprint plot for **6**, and those delineated into  $H\cdots H$ ,  $C\cdots H/H\cdots C$ ,  $N\cdots H/H\cdots N$ ,  $C\cdots C$ ,  $O\cdots H/H\cdots O$ ,  $N\cdots C/C\cdots N$ , and  $O\cdots C/C\cdots O$  contacts.

## S4. Photophysical data

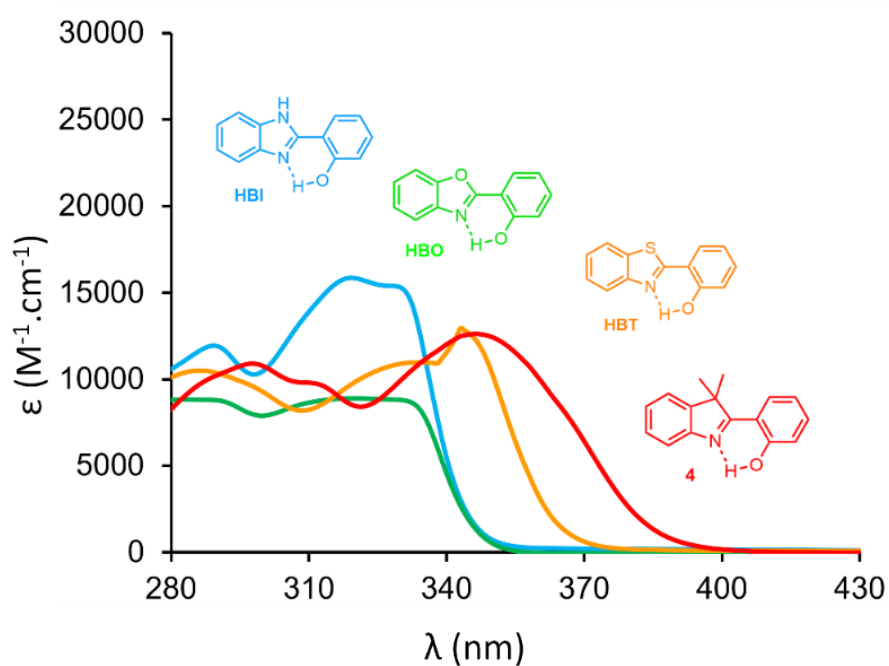

Figure S15. Absorption spectra of HBX dyes and HDMI 4 in dichloromethane.

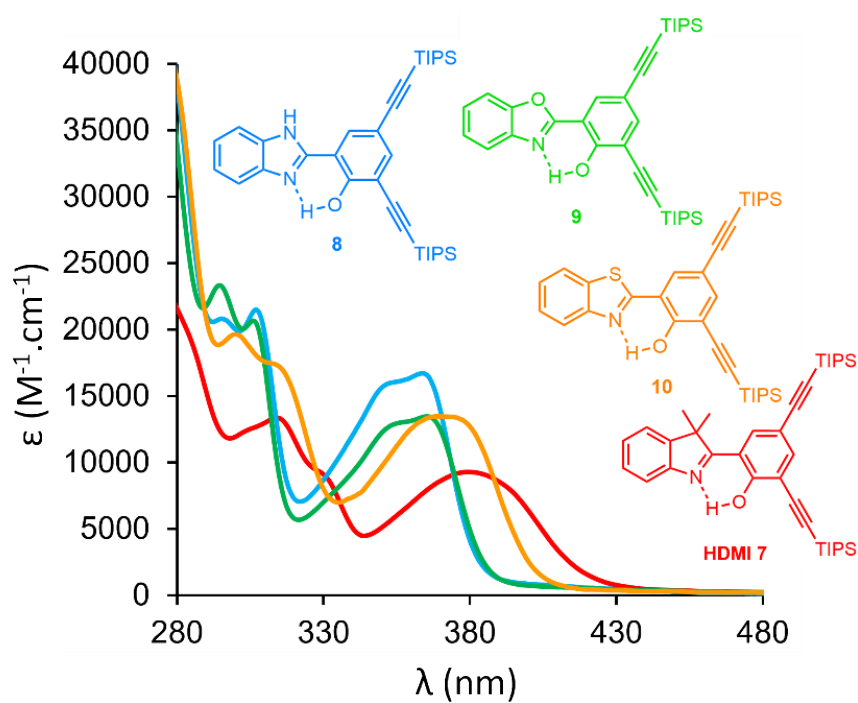

Figure S16. Absorption spectra of HBX dyes 7-10 in dichloromethane.

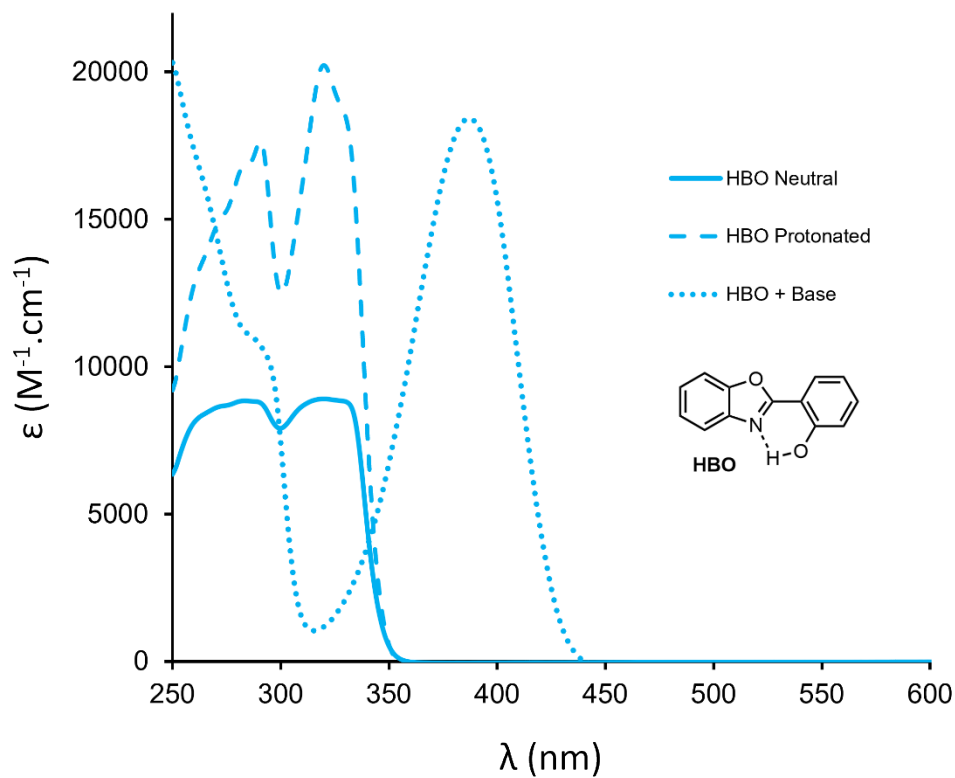

**Figure S17.** Absorption spectra of **HBO** in dichloromethane (neutral, plain; protonated with  $\text{HCl}_g$ , dashed and deprotonated with  $\text{Bu}_4\text{NOH}$ , dotted).

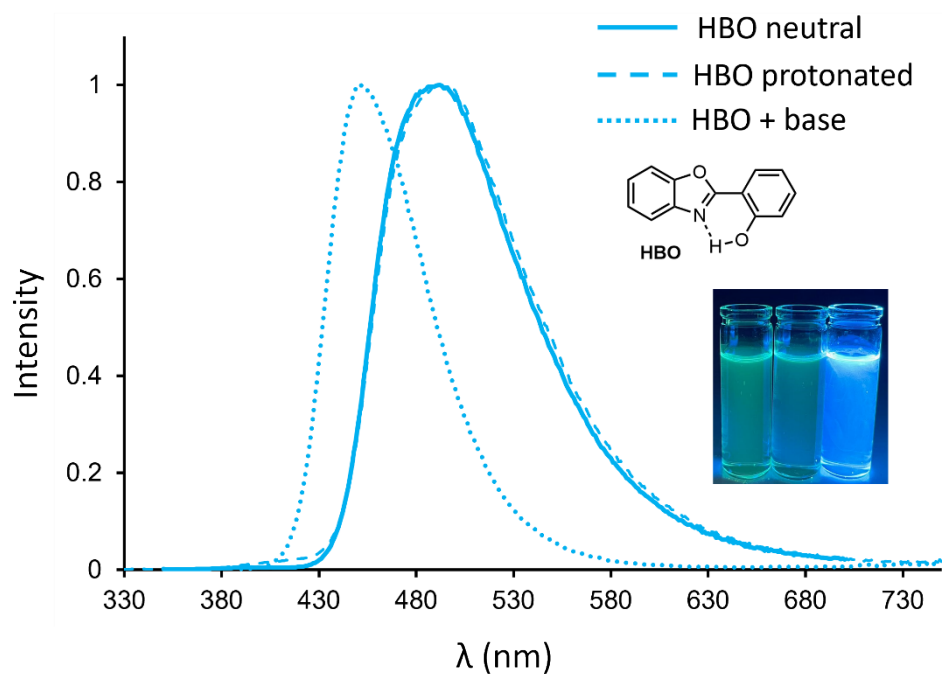

**Figure S18.** Emission spectra of **HBO** in dichloromethane (neutral, plain; protonated with  $\text{HCl}_g$ , dashed and deprotonated with  $\text{Bu}_4\text{NOH}$ , dotted).

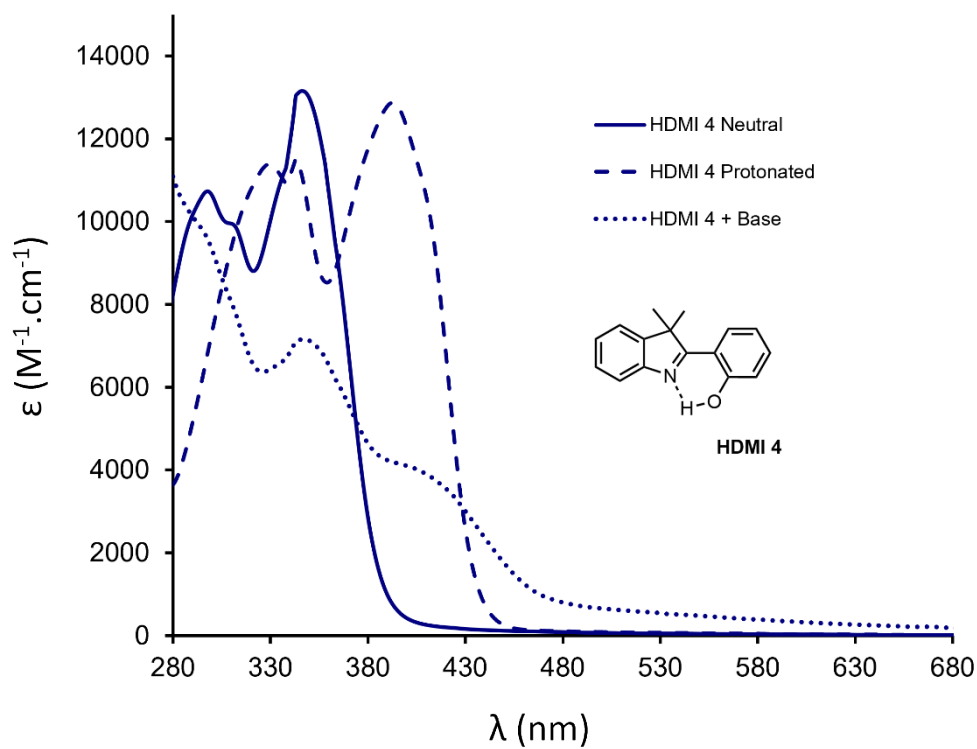

**Figure S19.** Absorption spectra of HDMI 4 in dichloromethane (neutral, plain; protonated with  $HCl_g$ , dashed and deprotonated with  $Bu_4NOH$ , dotted).

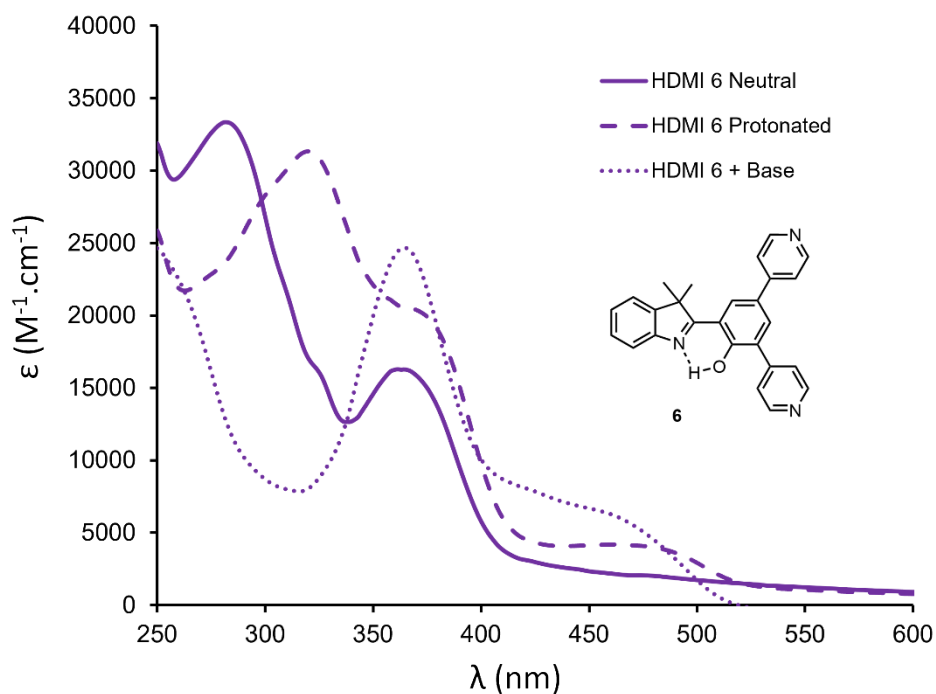

**Figure S20.** Absorption spectra of HDMI 6 in dichloromethane (neutral, plain; protonated with  $HCl_g$ , dashed and deprotonated with  $Bu_4NOH$ , dotted).

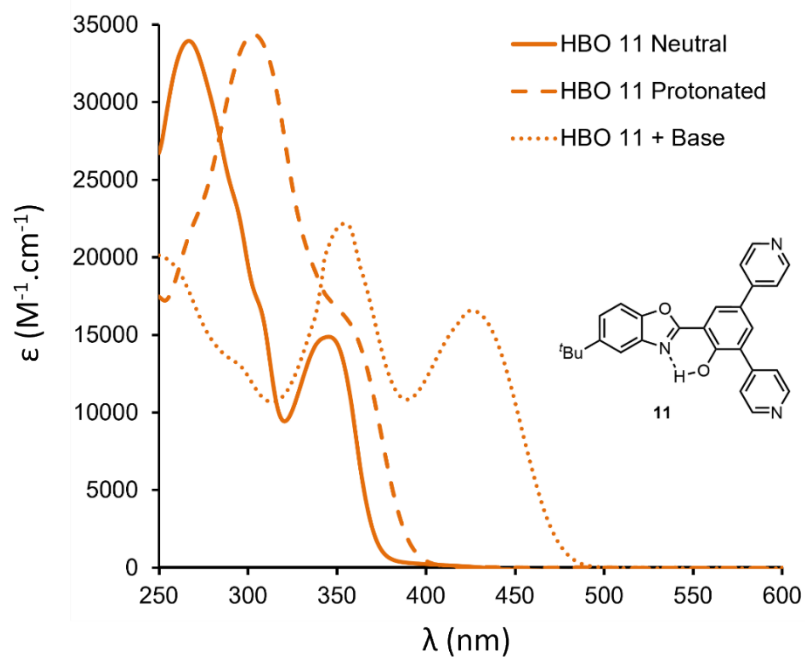

**Figure S21.** Absorption spectra of HBO 11 in dichloromethane (neutral, plain; protonated with  $\text{HCl}_g$ , dashed and deprotonated with  $\text{Bu}_4\text{NOH}$ , dotted).

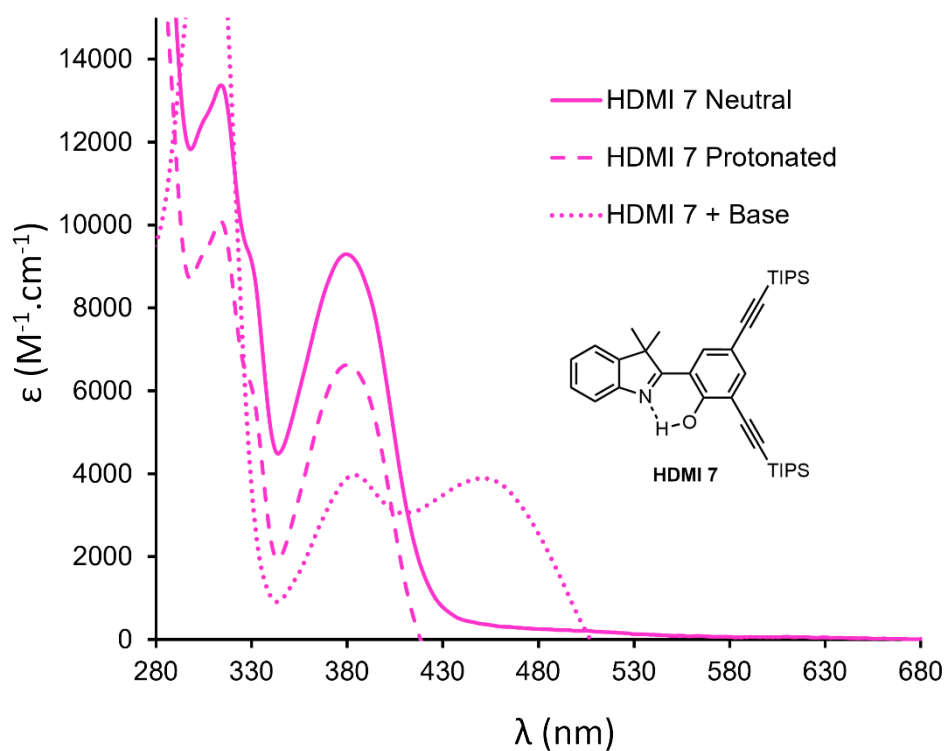

**Figure S22.** Absorption spectra of HDMI 7 in dichloromethane (neutral, plain; protonated with  $\text{HCl}_g$ , dashed and deprotonated with  $\text{Bu}_4\text{NOH}$ , dotted).

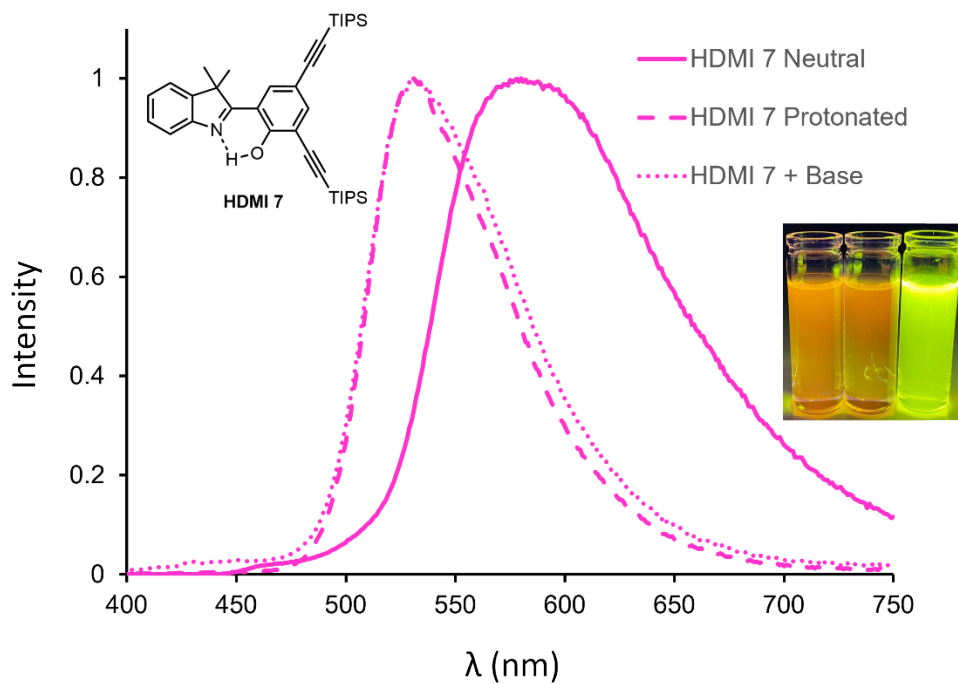

**Figure S23.** Emission spectra of HDMI **7** in dichloromethane (neutral, plain; protonated with  $\text{HCl}_g$ , dashed and deprotonated with  $\text{Bu}_4\text{NOH}$ , dotted).

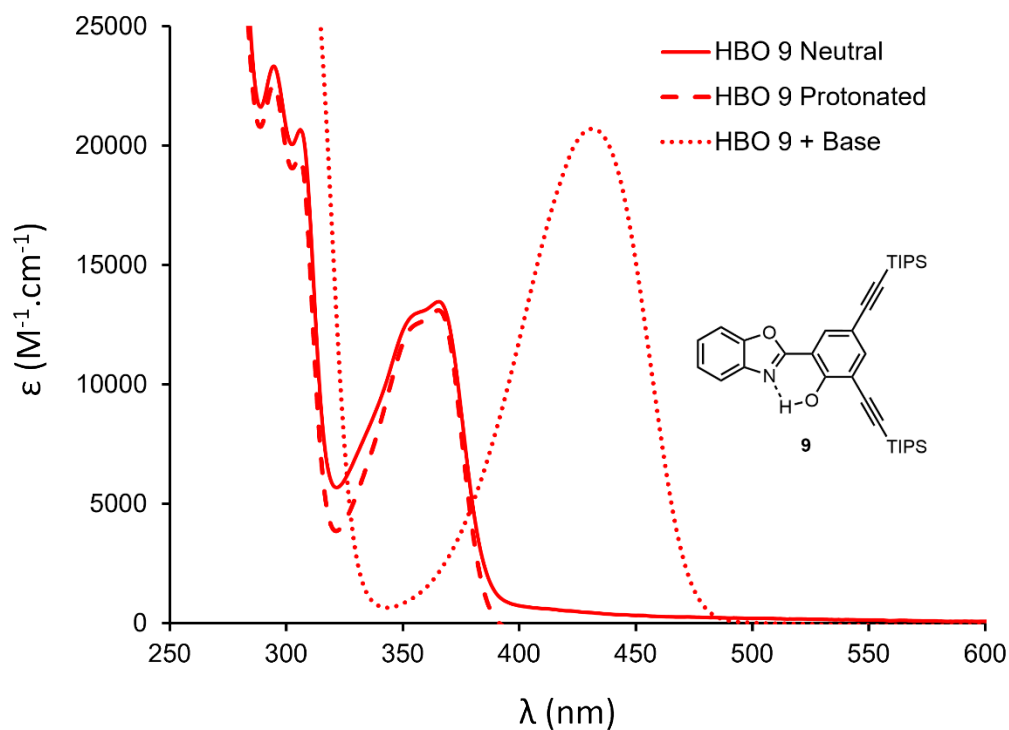

**Figure S24.** Absorption spectra of HBO **9** in dichloromethane (neutral, plain; protonated with  $\text{HCl}_g$ , dashed and deprotonated with  $\text{Bu}_4\text{NOH}$ , dotted).

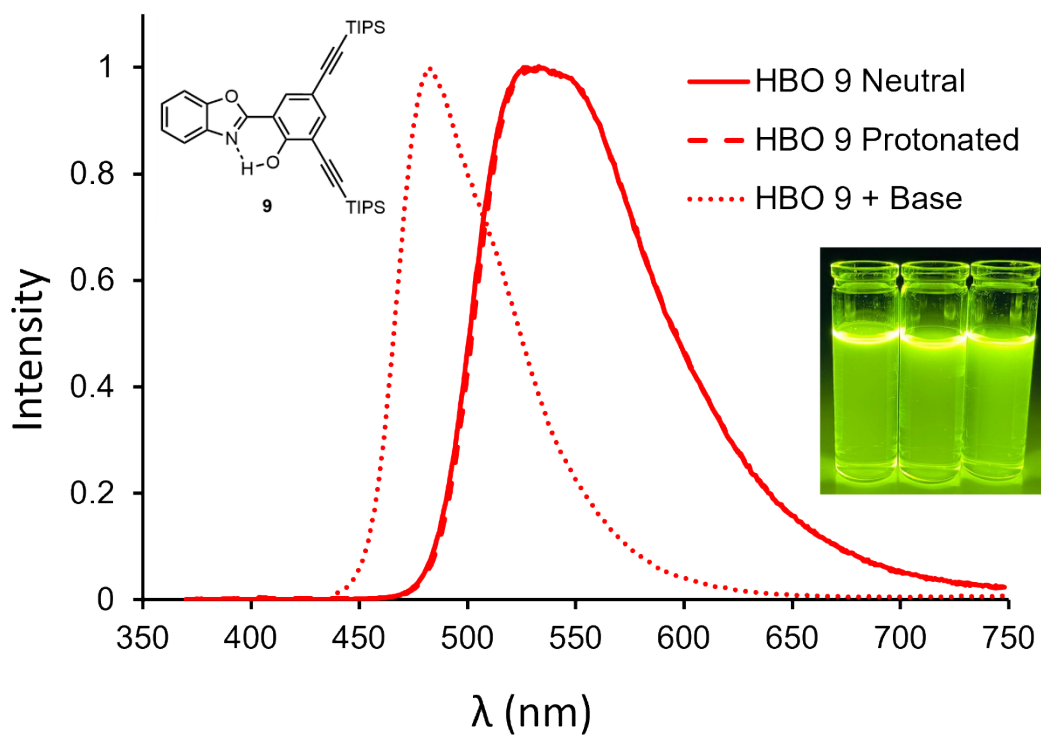

**Figure S25.** Emission spectra of HBO 9 in dichloromethane (neutral, plain; protonated with  $\text{HCl}_g$ , dashed and deprotonated with  $\text{Bu}_4\text{NOH}$ , dotted).

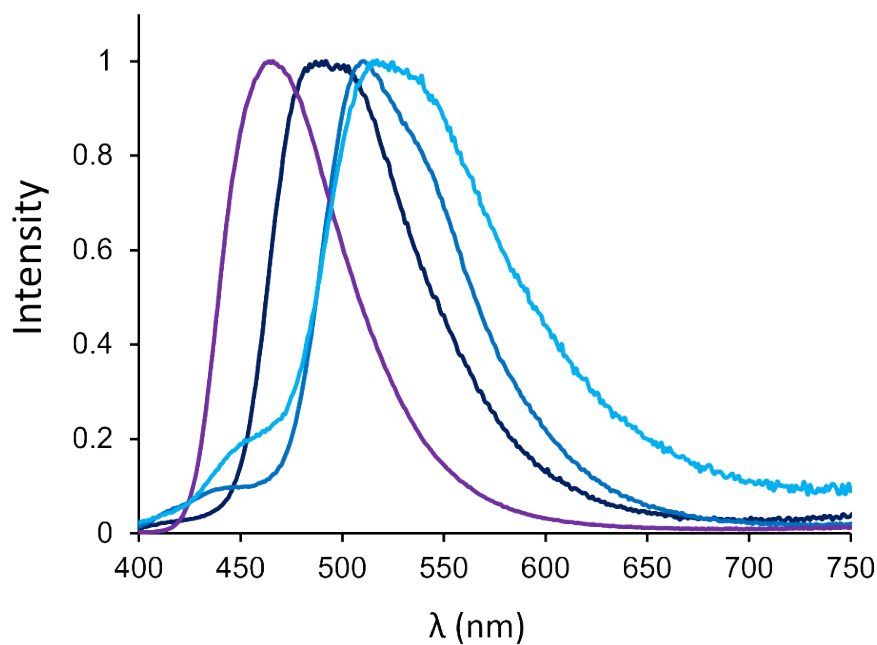

**Figure S26.** Emission spectra of HBX dyes (HBI = purple, HBO = navy blue, HBT = blue) and HDMI 4 (light blue) in the solid-state.

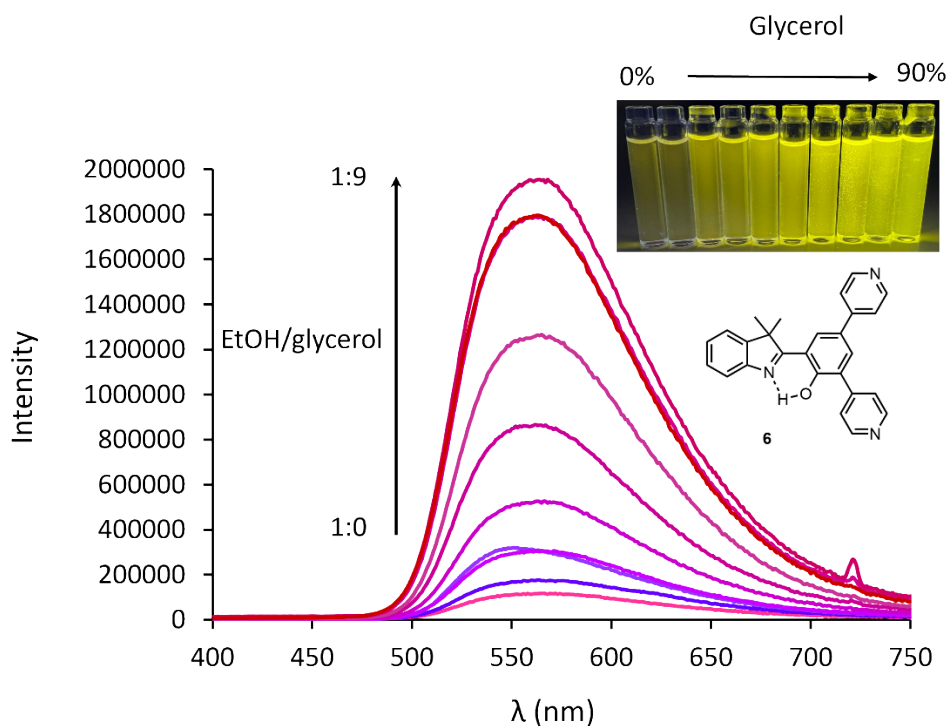

**Figure S27.** Emission spectra of HDMI **6** in ethanol/glycerol mixtures from EtOH (100%) to EtOH/glycerol (90/10). (Inset) Photographs of solutions of **6** in ethanol/glycerol mixtures under irradiation from a UV bench lamp ( $\lambda_{\text{exc}} = 365$  nm).

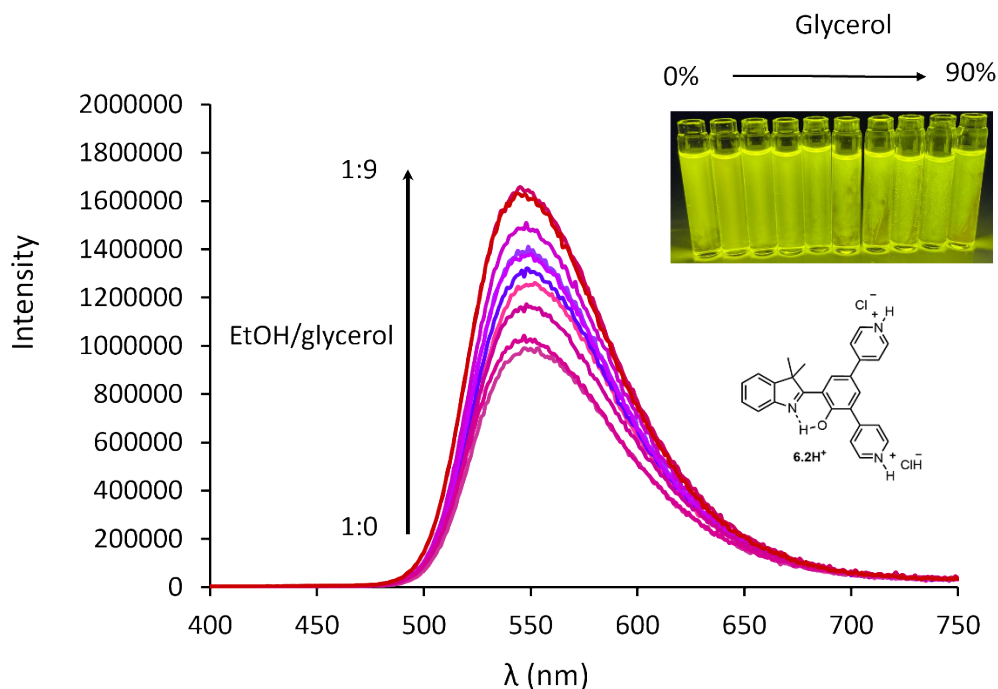

**Figure S28.** Emission spectra of HDMI **6.2H<sup>+</sup>** in ethanol/glycerol mixtures from EtOH (100%) to EtOH/glycerol (90/10). (Inset) Photographs of solutions of **6.2H<sup>+</sup>** in ethanol/glycerol mixtures under irradiation from a UV bench lamp ( $\lambda_{\text{exc}} = 365$  nm).



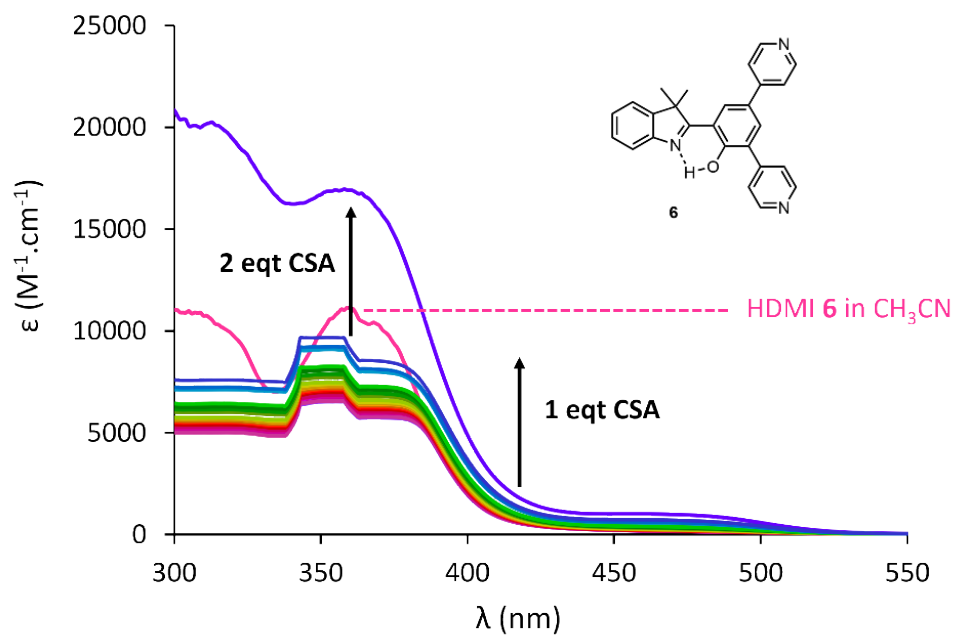

**Figure S29.** UV-Vis titration of HDMI 6 with 0 to 2 equivalents of Camphorsulfonic acid (CSA) in CH<sub>3</sub>CN.

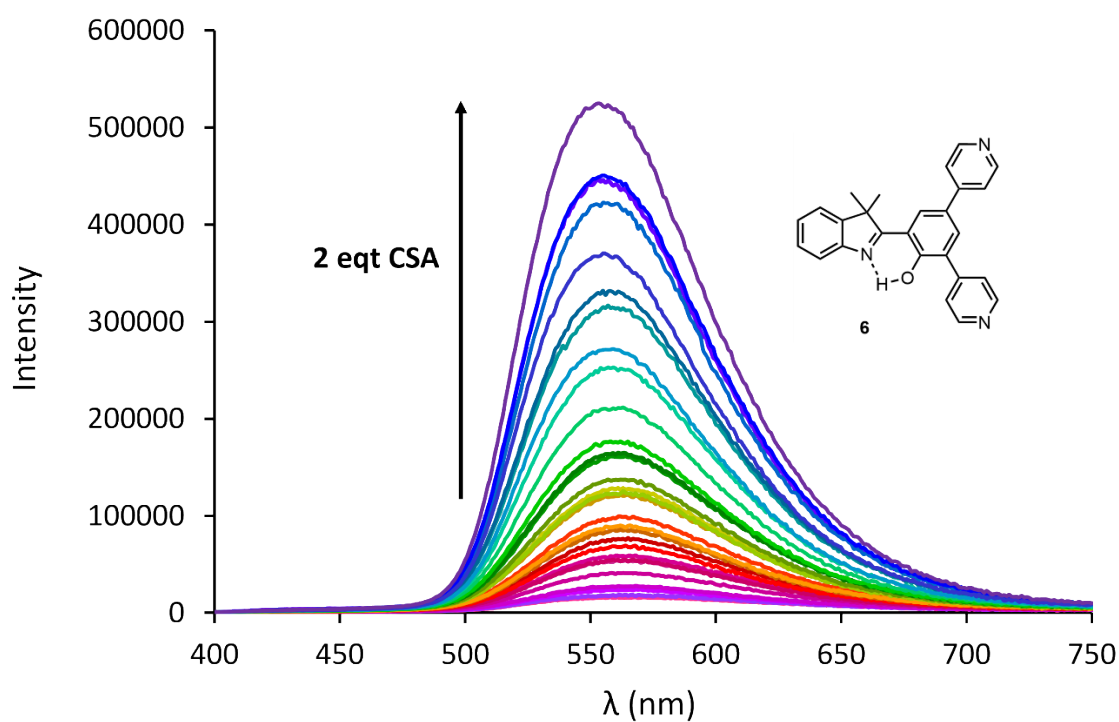

**Figure S30.** Fluorescence titration of HDMI 6 with 0 to 2 equivalents of with Camphorsulfonic acid (CSA) in CH<sub>3</sub>CN ( $\lambda_{\text{exc}} = 360$  nm).

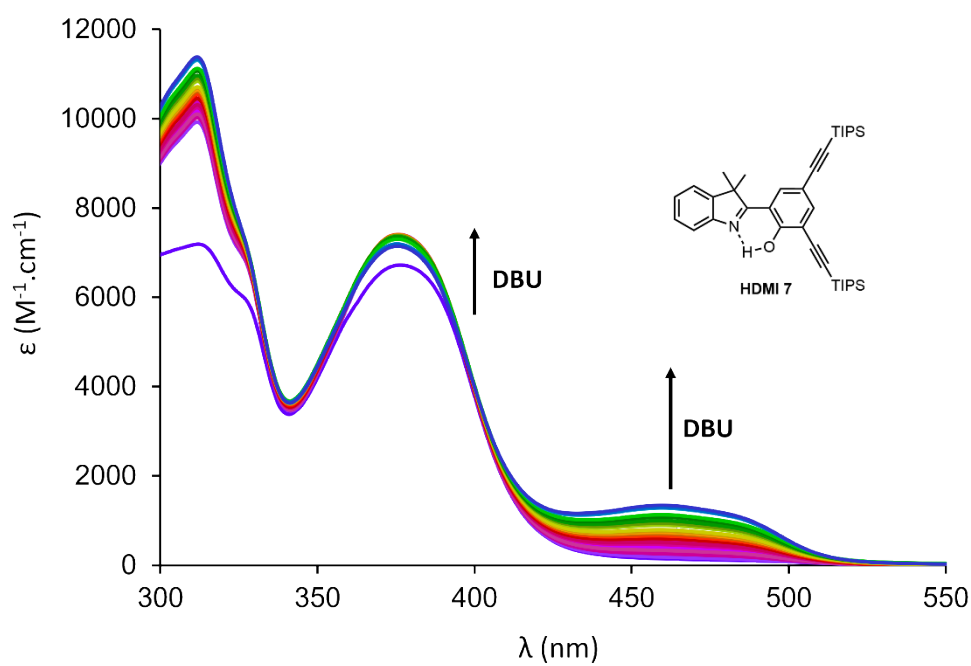

**Figure S31.** UV-Vis titration of HDMI 7 with 1,8-Diazabicyclo(5.4.0)undec-7-ene (DBU) in  $\text{CH}_3\text{CN}$ .

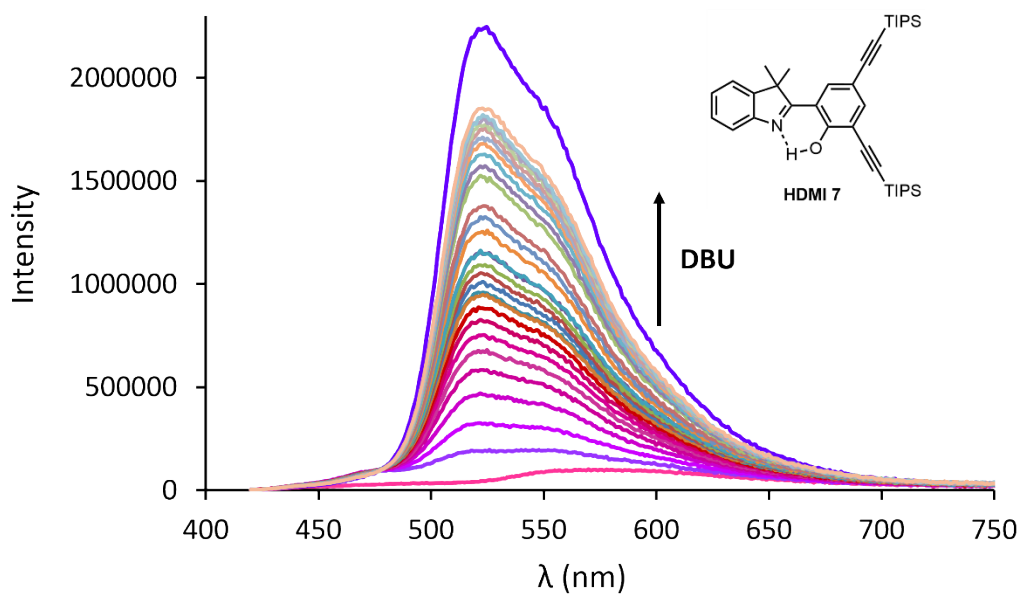

**Figure S32.** Fluorescence titration of HDMI 7 with 1,8-Diazabicyclo(5.4.0)undec-7-ene (DBU) in  $\text{CH}_3\text{CN}$  ( $\lambda_{\text{exc}} = 400 \text{ nm}$ ).

## S5. Theoretical methods and data

### Methods

To model ESIPT, we have relied on both Time-Dependent Density Functional Theory (TD-DFT) and a wavefunction coupled-cluster-based approach. We have used exact dye structures but for the replacement of the TIPS by TMS moieties for obvious computational reasons. We have optimized and computed the vibrational frequencies of the enol tautomer in its ground electronic state, and both enol and keto tautomers in their first excited state with TD-DFT. Depending on the considered structures, protonated or deprotonated structures were also computed. The comparison between E\* and K\* allowed computing the relative energies of the two species, and hence to determine if a driving force and a small barrier allow for ESIPT to take place (see below). The optimization and vibrational calculations were performed with the M06-2X functional<sup>9</sup> and the 6-31G(d) atomic basis set, including solvent effects (DCM as in the experiment) using the Polarizable Continuum Model (PCM), using the standard linear-response (LR) version of PCM for the TD-DFT part.<sup>10</sup> Next the vertical absorption and emission wavelengths have been respectively computed on both the optimal ground and excited state geometries. These calculations were done both in gas phase and in solution at the TD-M06-2X/6-311+G(2d,p) level, using the cLR<sup>2</sup> model<sup>11,12</sup> for the solution calculation, so as to simultaneously accounts for *linear-response* and *state-specific* solvent effects. All DFT and TD-DFT calculations were performed with Gaussian 16, using default algorithms but improved convergence thresholds for both ground state energies and residual forces.<sup>13</sup>

Secondly, we computed the vertical transition energies in gas-phase at the second-order coupled-cluster level, CC2,<sup>14</sup> with the *aug-cc-pVDZ* atomic basis set. These latter calculations were performed with the Turbomole package,<sup>15</sup> applying the RI approximation and freezing the core electrons. It was then possible to obtain theoretical best estimates of the vertical fluorescence energies using a combinatory approach

$$\Delta E^{\text{fluo}} = \Delta E_{\text{Gas}}^{\text{CC2}} + (\Delta E_{\text{cLR}^2\text{-PCM}}^{\text{TD-DFT}} - \Delta E_{\text{Gas}}^{\text{TD-DFT}}) \quad (\text{S1})$$

Therefore, the reported vertical transition wavelengths in the main text are CC2 values computed on TD-DFT geometries and corrected for solvation thanks to cLR<sup>2</sup>-TD-M06-2X calculations. Such combination allows to obtain accurate estimates at a reasonable computational cost.

For the molecules for which both E\* and K\* minima could be identified, we have also determined the ESIPT transition state, performing a true TS\* search (not a scan) thanks to analytical TD-DFT Hessian implemented in Gaussian. It was checked that the final TS\* had a single imaginary frequency corresponding to the ESIPT.

### Electron density difference (EDD) Plots

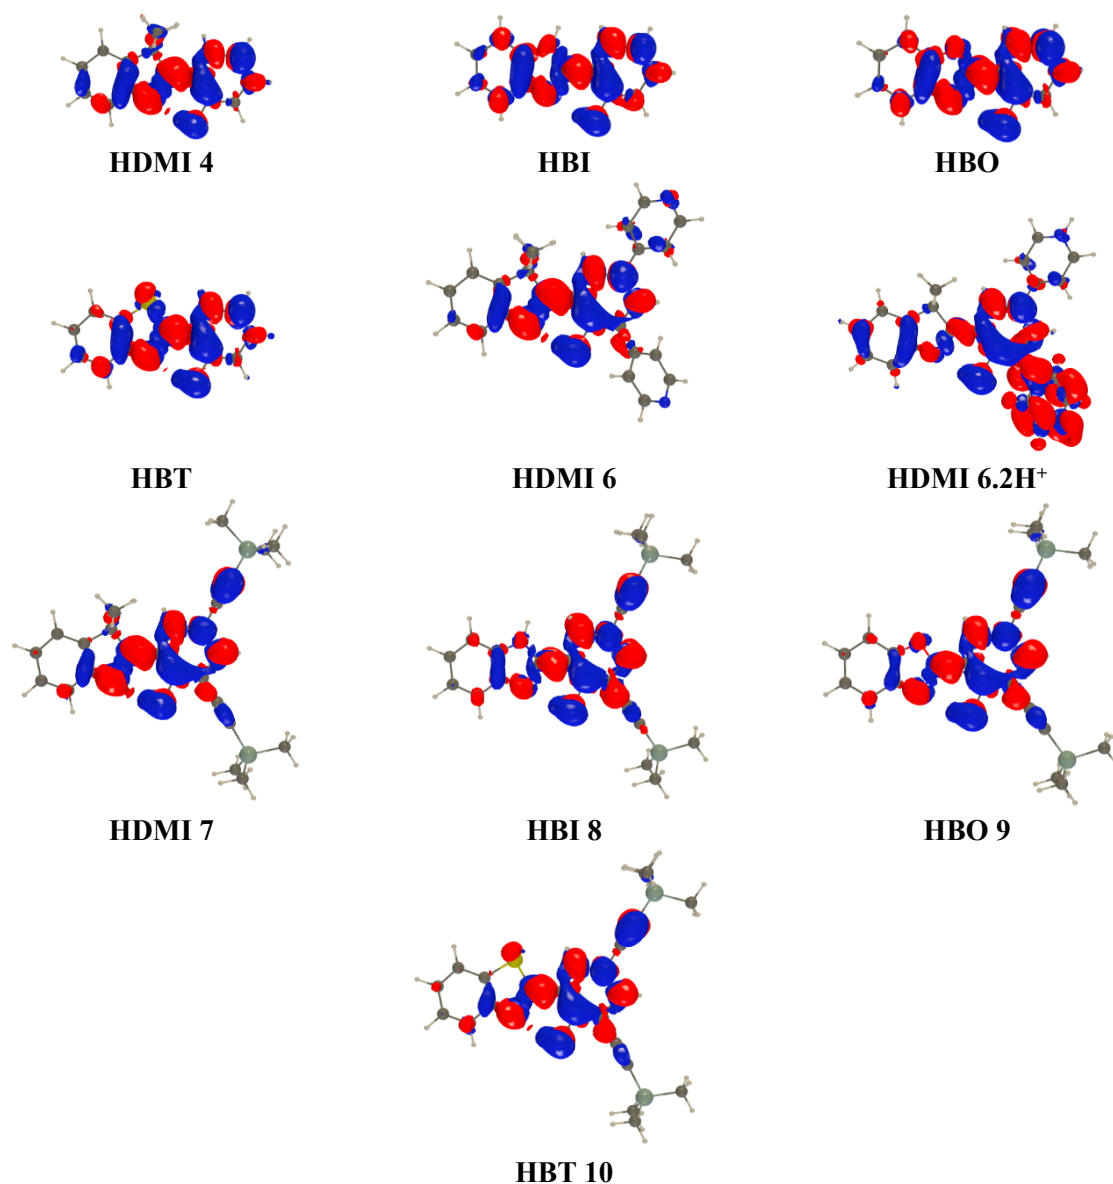

**Figure S33.** Electron density difference (EDD) plots showing changes of density upon absorption from the ground-state. Blue and red lobes correspond to regions of decrease and increase of electron density upon absorption. Contour threshold: 0.001 au.

## PES scans around the central ring

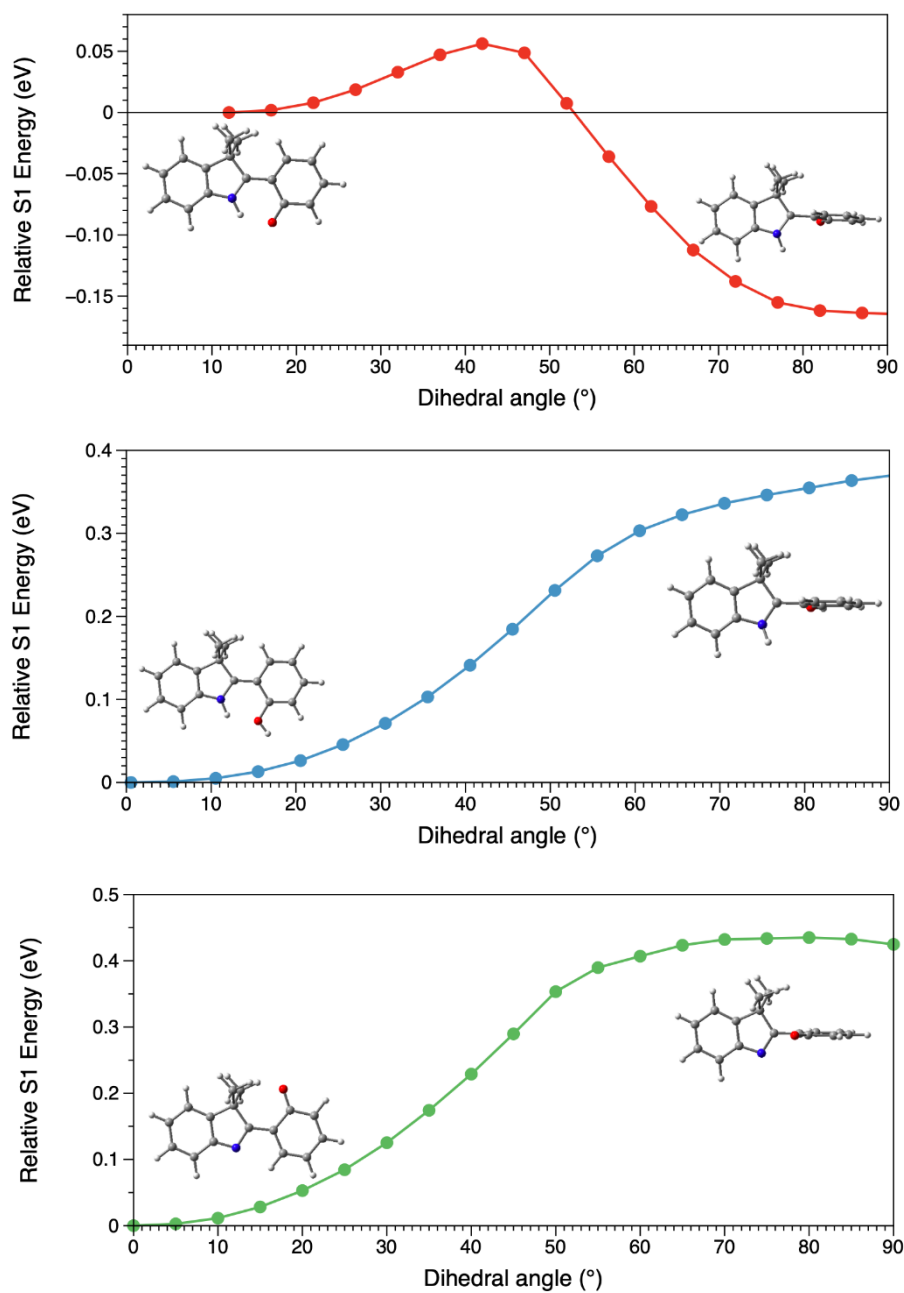

**Figure S34.** Potential energy surfaces of the  $S_1$  state obtained by a relaxed (LR-PCM)-TD-DFT scan around the inter-ring dihedral angle for HDMI **4**, under its keto (top), protonated (center) and deprotonated (bottom) forms.

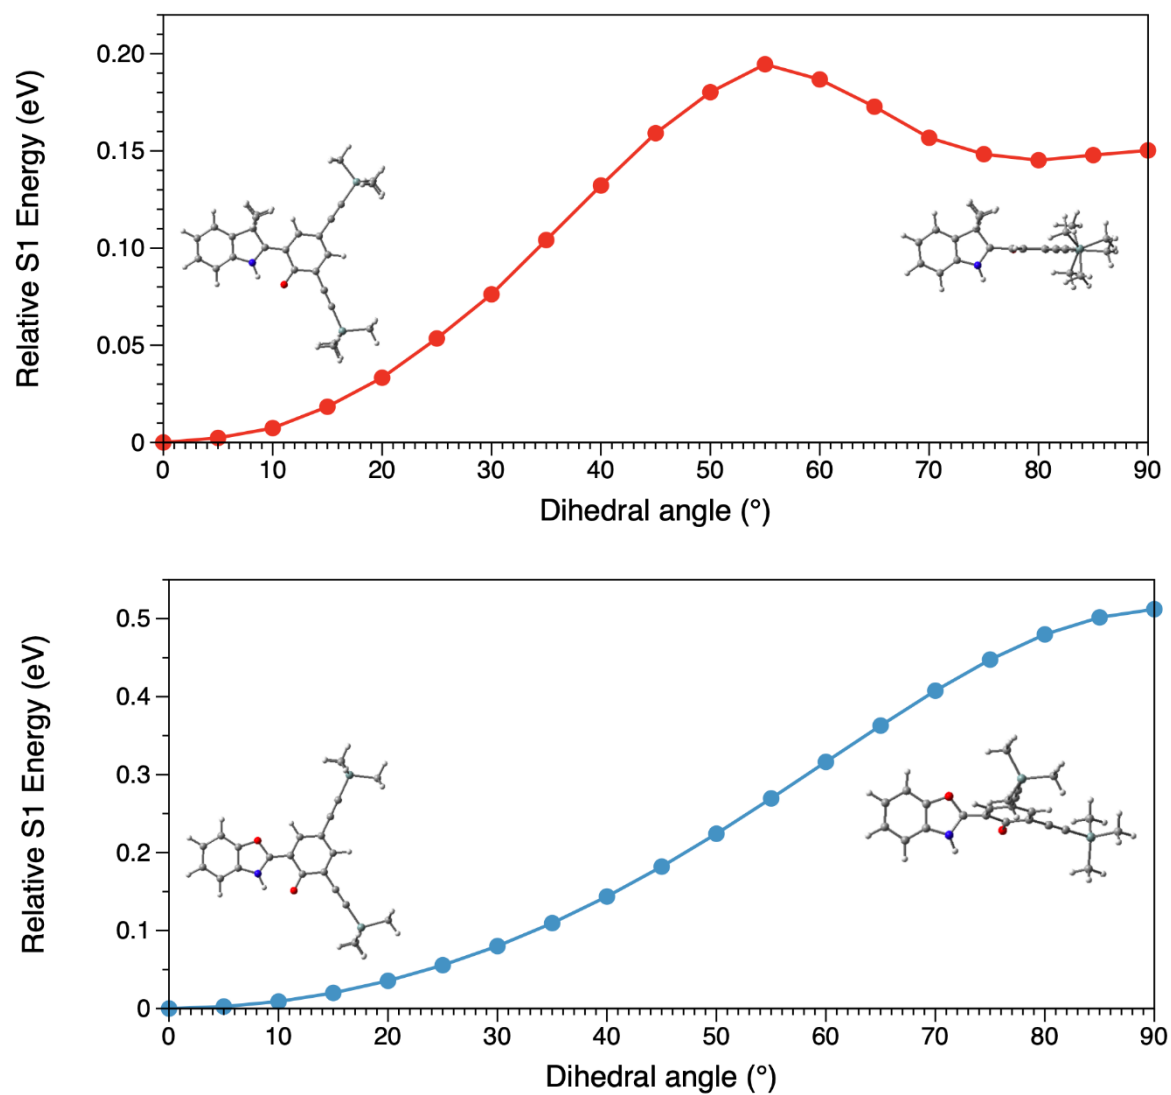

**Figure S35.** Potential energy surfaces of the  $S_1$  state obtained by a relaxed (LR-PCM)-TD-DFT scan around the inter-ring dihedral angle of the keto forms of HDMI **7** (top) and HBO **9** (bottom).

## Comparisons of HBO and 4 emissive $K^*$ geometries

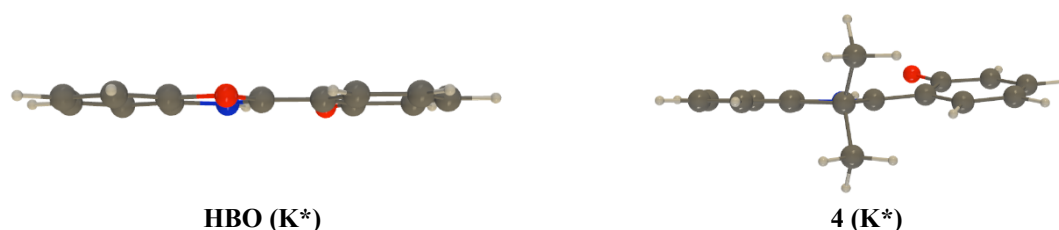

**Figure S36.** Top views of the optimal excited-state geometries of the keto forms of **HBO** (left) and **HDMI 4** (right).

## H-bond strength in the $E^*$ form

To estimate the H-bond strength in the excited-state (enol form), we have taken the optimal  $E^*$  structures of **HDMI 4**, **HBI**, **HBO** and **HBT** and simply “flipped” the hydroxyl group (see Figure S31) without reoptimizing the structure. We have next compared the cLR<sup>2</sup>-TD-M06-2X energies of the two structures to estimate the H-bond strength. While this approach is obviously approximated, what is of interest for our purposes are the trends in the series. We obtain the following estimates: 17.9 kcal.mol<sup>-1</sup> for **HDMI 4**, 15.5 kcal.mol<sup>-1</sup> for **HBI**, 13.2 kcal.mol<sup>-1</sup> for **HBO**, and 16.7 kcal.mol<sup>-1</sup> for **HBT**.

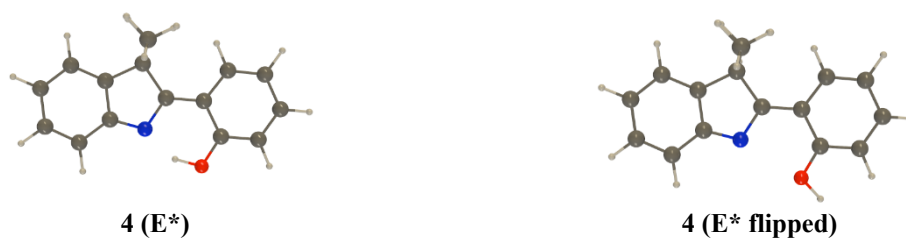

**Figure S37.** Illustration for **HDMI 4** of the optimal  $E^*$  structure (left) and the “flipped OH” one (right) used for estimating the H-bond strength. Similar structures are used for the other compounds.

## Computed wavelengths and oscillator strengths

In Table S2, we compare theoretical vertical absorption energies to experimental wavelengths of maximal absorption. In all cases, the transition reported corresponds to a  $S_0$ - $S_1$  excitation, and all transitions are bright, as indicated by the large oscillator strengths.

It should be recalled that, the former values do not account for vibronic couplings, hence, one cannot expect a perfect match with the experimental wavelengths, yet similar trends are often observed. In Table S2, one observes that the theoretical wavelengths are nearly systematically (one exception only) smaller than their experimental counterparts, which is the expected trend for absorption since the account of vibronic effects typically tends to redshift the experimental estimates. The mean absolute deviation between experiment and theory attains 28 nm (or 0.28 eV). In addition, the linear correlation coefficient ( $R$ ) between experimental and theoretical energies attains 0.94, indicating that theory provides ca. 89% of the experimental variability.

**Table S2.** Comparison between the computed vertical absorption wavelengths and the experimentally measured  $\lambda_{\max}$  (in nm). We also provide the computed oscillator strengths ( $f$ ). The theoretical wavelengths are the ones obtained using Eq. (S1), whereas the oscillator strengths are the LR(neq)-PCM-TD-DFT ones. In all case, the reported (bright) state corresponds to a  $S_0$ - $S_1$  transition.

| Dye                   | $\lambda_{\text{abs}}^{\text{vert-theo}}$<br>(nm) | $f^{\text{theo}}$ | $\lambda_{\text{max}}^{\text{exp}}$<br>(nm) |
|-----------------------|---------------------------------------------------|-------------------|---------------------------------------------|
| <b>HDMI 4</b>         | 327                                               | 0.609             | 349                                         |
| <i>Protonated</i>     | 353                                               | 0.602             | 393                                         |
| <i>Deprotonated</i>   | 444                                               | 0.478             | 411                                         |
| <b>HBI</b>            | 300                                               | 0.733             | 320                                         |
| <b>HBO</b>            | 300                                               | 0.687             | 321                                         |
| <b>HBT</b>            | 316                                               | 0.628             | 343                                         |
| <b>HDMI 6</b>         | 345                                               | 0.580             | 367                                         |
| <i>(di)Protonated</i> | 356                                               | 0.487             |                                             |
| <i>Deprotonated</i>   | 469                                               | 0.533             | 460                                         |
| <b>HDMI 7</b>         | 351                                               | 0.505             | 382                                         |
| <b>HBI 8</b>          | 327                                               | 0.554             | 362                                         |
| <b>HBO 9</b>          | 327                                               | 0.474             | 367                                         |
| <b>HBT 10</b>         | 341                                               | 0.491             | 373                                         |



Table S3 does provide the equivalent of Table S2 for emission. First, it should be noted that irrespective of the considered molecule (and form), all states are bright (large  $f$ ) compatible with emission. There is no reason to expect an anti-Kasha emission here, and the lowest excited state was considered. As above, one has to be cautious in assessing the theoretical accuracy using such *vertical versus maximum* comparison. Yet, from the values listed in Table S3, we obtain MAE of 26 nm or 0.13 eV, which are very satisfying for this level of theory. The  $R$  determined on the basis of excitation energies remains very large, 0.87, though slightly below its value for absorption.

**Table S3.** Comparison between the computed vertical emission wavelengths and the experimentally measured  $\lambda_{fl}$  (in nm). We also provide the computed oscillator strengths ( $f$ ) in parenthesis. The theoretical wavelengths are the ones obtained using Eq. (S1), whereas the oscillator strengths are the LR(neq)-PCM-TD-DFT ones. In all case, the reported (bright) state corresponds to a  $S_1$ - $S_0$  transition.

| Dye            | $\lambda_{fl}^{\text{vert-theo}} (E^*/D^*)$<br>(nm) | $\lambda_{fl}^{\text{vert-theo}} (K^*)$<br>(nm) | $\lambda_{fl}^{\text{exp}} (E^*/D^*)$<br>(nm) | $\lambda_{fl}^{\text{exp}} (K^*)$<br>(nm) |
|----------------|-----------------------------------------------------|-------------------------------------------------|-----------------------------------------------|-------------------------------------------|
| HDMI 4         | 399 (0.695)                                         | 505 (0.380)                                     |                                               | 519                                       |
| Protonated     | 442(0.667)                                          |                                                 | 476                                           |                                           |
| Deprotonated   | 517(0.531)                                          |                                                 | 512                                           |                                           |
| HBI            | 345 (0.875)                                         | 440 (0.506)                                     |                                               | 467                                       |
| HBO            | 348 (0.853)                                         | 448 (0.437)                                     |                                               | 495                                       |
| HBT            | 371 (0.730)                                         | 479 (0.462)                                     |                                               | 528                                       |
| HDMI 6         | <sup>[a]</sup>                                      | 529 (0.624)                                     |                                               | 537                                       |
| (di)Protonated | <sup>[a]</sup>                                      | 524 (0.667)                                     |                                               | 535                                       |
| Deprotonated   | 544(0.616)                                          |                                                 | 532                                           |                                           |
| HDMI 7         | <sup>[a]</sup>                                      | 538 (0.509)                                     |                                               | 580                                       |
| HBI 8          | 376 (0.624)                                         | 481 (0.589)                                     |                                               | 504                                       |
| HBO 9          | 379 (0.554)                                         | 496 (0.525)                                     |                                               | 533                                       |
| HBT 10         | 412 (0.556)                                         | 532 (0.546)                                     |                                               | 566                                       |

<sup>[a]</sup> During the TD-DFT optimization, the  $E^*$  form transforms into the  $K^*$  spontaneously.

## Cartesian coordinates

Below are the Cartesian coordinates (Å) for all compounds listed in Table 2 of the main text. We also provide the LR-PCM-TD-DFT free energies for all species. All structures are true minima of their respective PES (no imaginary frequency), but for the ES IPT TS for which one imaginary frequency is found.

### HDMI 4 — E ( $S_0$ ) — $G = -748.183934$ au.

|   |            |            |            |
|---|------------|------------|------------|
| C | -1.2085070 | -1.5992110 | 0.0000000  |
| C | 0.0961370  | -2.0970350 | 0.0000000  |
| C | 0.3247080  | -3.4631990 | 0.0000000  |
| C | -0.7804500 | -4.3209420 | 0.0000000  |
| C | -2.0819290 | -3.8131020 | 0.0000000  |
| C | -2.3160790 | -2.4374110 | 0.0000000  |
| C | 0.0234570  | 0.2265930  | 0.0000000  |
| H | 1.3343150  | -3.8665150 | 0.0000000  |
| H | -0.6252610 | -5.3951090 | 0.0000000  |
| H | -2.9233990 | -4.4986970 | 0.0000000  |
| H | -3.3218930 | -2.0302860 | 0.0000000  |
| C | 0.3169180  | 1.6610680  | 0.0000000  |
| C | -0.7465360 | 2.6039840  | 0.0000000  |
| C | 1.6344900  | 2.1562180  | 0.0000000  |
| C | -0.4621830 | 3.9759880  | 0.0000000  |
| C | 1.9075020  | 3.5132270  | 0.0000000  |
| H | 2.4635830  | 1.4603170  | 0.0000000  |
| C | 0.8471530  | 4.4249330  | 0.0000000  |
| H | -1.2998220 | 4.6655030  | 0.0000000  |
| H | 2.9343970  | 3.8611490  | 0.0000000  |
| H | 1.0468060  | 5.4921450  | 0.0000000  |
| N | -1.2089390 | -0.1907470 | 0.0000000  |
| O | -2.0386940 | 2.2483580  | 0.0000000  |
| H | -2.0779910 | 1.2521550  | 0.0000000  |
| C | 1.0468690  | -0.9211970 | 0.0000000  |
| C | 1.9075020  | -0.9410440 | 1.2760360  |
| H | 2.5974400  | -0.0958860 | 1.3231870  |
| H | 1.2751350  | -0.9217460 | 2.1681920  |
| H | 2.4984550  | -1.8619980 | 1.2947340  |
| C | 1.9075020  | -0.9410440 | -1.2760360 |
| H | 1.2751350  | -0.9217460 | -2.1681920 |
| H | 2.5974400  | -0.0958860 | -1.3231870 |
| H | 2.4984550  | -1.8619980 | -1.2947340 |

### HDMI 4 — E\* ( $S_1$ ) — $G = -748.058774$ au.

|   |            |            |           |
|---|------------|------------|-----------|
| C | -0.1673430 | -1.9677100 | 0.0000000 |
| C | 1.2352840  | -1.6714000 | 0.0000000 |
| C | 2.1680970  | -2.6867440 | 0.0000000 |
| C | 1.7207720  | -4.0148430 | 0.0000000 |
| C | 0.3402450  | -4.3135200 | 0.0000000 |
| C | -0.6134390 | -3.3170980 | 0.0000000 |
| C | -0.0663720 | 0.2425080  | 0.0000000 |
| H | 3.2333470  | -2.4681330 | 0.0000000 |
| H | 2.4410110  | -4.8264980 | 0.0000000 |
| H | 0.0277420  | -5.3532500 | 0.0000000 |
| H | -1.6754580 | -3.5386560 | 0.0000000 |
| C | -0.6137500 | 1.5362620  | 0.0000000 |
| C | -2.0707620 | 1.7282960  | 0.0000000 |
| C | 0.1744870  | 2.7279770  | 0.0000000 |
| C | -2.6204240 | 3.0177720  | 0.0000000 |
| C | -0.3978730 | 3.9802980  | 0.0000000 |
| H | 1.2536010  | 2.6417650  | 0.0000000 |

|   |            |            |            |
|---|------------|------------|------------|
| C | -1.8037690 | 4.1355200  | 0.0000000  |
| H | -3.7023670 | 3.0990900  | 0.0000000  |
| H | 0.2384200  | 4.8594350  | 0.0000000  |
| H | -2.2410170 | 5.1283990  | 0.0000000  |
| N | -0.9138540 | -0.8572790 | 0.0000000  |
| O | -2.9013610 | 0.7018700  | 0.0000000  |
| H | -2.3335140 | -0.1533500 | 0.0000000  |
| C | 1.4084390  | -0.1686840 | 0.0000000  |
| C | 2.1680970  | 0.2778910  | 1.2668110  |
| H | 2.2980770  | 1.3625930  | 1.3015910  |
| H | 1.6332110  | -0.0357520 | 2.1673430  |
| H | 3.1624010  | -0.1814930 | 1.2777720  |
| C | 2.1680970  | 0.2778910  | -1.2668110 |
| H | 1.6332110  | -0.0357520 | -2.1673430 |
| H | 2.2980770  | 1.3625930  | -1.3015910 |
| H | 3.1624010  | -0.1814930 | -1.2777720 |

**HDMI 4 — K\* ( $S_I$ ) —  $G = -748.069009$  au.**

|   |            |            |            |
|---|------------|------------|------------|
| C | 1.8100970  | -0.9066070 | -0.1366080 |
| C | 2.0297450  | 0.4694580  | 0.0499070  |
| C | 3.3196710  | 0.9463490  | 0.1960320  |
| C | 4.3838510  | 0.0374980  | 0.1583080  |
| C | 4.1476820  | -1.3298620 | -0.0283850 |
| C | 2.8582200  | -1.8290860 | -0.1815610 |
| C | -0.2656910 | 0.0280990  | -0.1086930 |
| H | 3.5082090  | 2.0072180  | 0.3404060  |
| H | 5.4016160  | 0.3949590  | 0.2738280  |
| H | 4.9873100  | -2.0173260 | -0.0535120 |
| H | 2.6708950  | -2.8879640 | -0.3242050 |
| C | -1.6936990 | 0.0167400  | -0.0586900 |
| C | -2.4211610 | -1.2750210 | 0.0964870  |
| C | -2.4555990 | 1.1812640  | -0.1579210 |
| C | -3.8517220 | -1.2322490 | 0.1031210  |
| C | -3.8637280 | 1.1658760  | -0.1004380 |
| H | -1.9632840 | 2.1360870  | -0.2997080 |
| C | -4.5611600 | -0.0384440 | 0.0247580  |
| H | -4.3576140 | -2.1844040 | 0.2297580  |
| H | -4.4011160 | 2.1061670  | -0.1678280 |
| H | -5.6456510 | -0.0416370 | 0.0584350  |
| N | 0.4565090  | -1.1181830 | -0.2601670 |
| O | -1.7976500 | -2.3635690 | 0.2301910  |
| C | 0.6995660  | 1.2014890  | 0.0211040  |
| C | 0.4822980  | 2.0136640  | 1.3110230  |
| H | -0.4916710 | 2.5099840  | 1.3085540  |
| H | 0.5398970  | 1.3659020  | 2.1896500  |
| H | 1.2572860  | 2.7824750  | 1.3942470  |
| C | 0.6668710  | 2.1311210  | -1.2154760 |
| H | 0.7911950  | 1.5533170  | -2.1352720 |
| H | -0.2679170 | 2.6927240  | -1.2796610 |
| H | 1.4896030  | 2.8500920  | -1.1446730 |
| H | -0.0445670 | -2.0134830 | -0.2481890 |

**HDMI 4 — TS\* ( $S_I$ ) —  $G = -748.060859$  au,  $\nu = 1090.3$   $i$   $\text{cm}^{-1}$**

|   |            |            |            |
|---|------------|------------|------------|
| C | 1.7304650  | -0.9090390 | -0.0898120 |
| C | 2.0180720  | 0.4810690  | 0.0289090  |
| C | 3.3242540  | 0.9179390  | 0.1252080  |
| C | 4.3567480  | -0.0286210 | 0.1083480  |
| C | 4.0709550  | -1.4012870 | -0.0082770 |
| C | 2.7700270  | -1.8631200 | -0.1114740 |
| C | -0.2617410 | 0.0891620  | -0.0803800 |
| H | 3.5537060  | 1.9772920  | 0.2119850  |

|   |            |            |            |
|---|------------|------------|------------|
| H | 5.3888750  | 0.2978560  | 0.1826630  |
| H | 4.8909960  | -2.1127670 | -0.0173530 |
| H | 2.5442620  | -2.9205650 | -0.1998840 |
| C | -1.6700320 | 0.0738620  | -0.0207860 |
| C | -2.3548390 | -1.2367570 | 0.0559940  |
| C | -2.4940600 | 1.2247540  | -0.0402090 |
| C | -3.7656800 | -1.2954110 | 0.0269440  |
| C | -3.8760620 | 1.1235170  | -0.0282330 |
| H | -2.0354510 | 2.2055250  | -0.0893240 |
| C | -4.5194390 | -0.1357930 | 0.0010910  |
| H | -4.2235460 | -2.2781630 | 0.0692180  |
| H | -4.4749990 | 2.0282510  | -0.0533530 |
| H | -5.6028750 | -0.1889640 | 0.0063250  |
| N | 0.3982230  | -1.1163650 | -0.1909710 |
| O | -1.6619600 | -2.3289400 | 0.1676680  |
| H | -0.5529980 | -2.0194420 | 0.0048450  |
| C | 0.7156450  | 1.2564040  | -0.0040710 |
| C | 0.5501700  | 2.1079000  | 1.2686340  |
| H | -0.3993100 | 2.6501090  | 1.2674710  |
| H | 0.5892530  | 1.4793350  | 2.1622810  |
| H | 1.3590100  | 2.8438860  | 1.3268390  |
| C | 0.6586270  | 2.1531800  | -1.2596390 |
| H | 0.7818820  | 1.5551920  | -2.1666500 |
| H | -0.2934760 | 2.6877550  | -1.3230490 |
| H | 1.4641240  | 2.8942350  | -1.2200420 |

**HDMI 4 — P ( $S_0$ ) —  $G = -748.603466$  au.**

|   |            |            |            |
|---|------------|------------|------------|
| C | -1.8559250 | -0.8895140 | -0.0000050 |
| C | -2.0518270 | 0.4847950  | 0.0000040  |
| C | -3.3428800 | 0.9884710  | 0.0000090  |
| C | -4.4042250 | 0.0799120  | 0.0000040  |
| C | -4.1784930 | -1.2997730 | -0.0000050 |
| C | -2.8842150 | -1.8179550 | -0.0000090 |
| C | 0.2469090  | -0.0148910 | -0.0000050 |
| H | -3.5305530 | 2.0580190  | 0.0000160  |
| H | -5.4231770 | 0.4516920  | 0.0000070  |
| H | -5.0226090 | -1.9805920 | -0.0000090 |
| H | -2.6938830 | -2.8854810 | -0.0000160 |
| C | 1.6940820  | 0.0048590  | -0.0000050 |
| C | 2.4638770  | -1.1864610 | 0.0000030  |
| C | 2.3926120  | 1.2323490  | -0.0000080 |
| C | 3.8561680  | -1.1344330 | 0.0000030  |
| C | 3.7723710  | 1.2820980  | -0.0000080 |
| H | 1.8406650  | 2.1610690  | -0.0000100 |
| C | 4.5038800  | 0.0910340  | -0.0000030 |
| H | 4.4219800  | -2.0613050 | 0.0000090  |
| H | 4.2798410  | 2.2391790  | -0.0000120 |
| H | 5.5884090  | 0.1177870  | -0.0000030 |
| N | -0.4634120 | -1.1199930 | -0.0000080 |
| O | 1.8107290  | -2.3690250 | 0.0000120  |
| H | 2.4336070  | -3.1141160 | 0.0000150  |
| C | -0.7082480 | 1.1832420  | 0.0000030  |
| C | -0.5680700 | 2.0297900  | -1.2823780 |
| H | 0.3784990  | 2.5700950  | -1.3248220 |
| H | -0.6545110 | 1.4021120  | -2.1730410 |
| H | -1.3788230 | 2.7630770  | -1.2982560 |
| C | -0.5680550 | 2.0297780  | 1.2823900  |
| H | -0.6544620 | 1.4020890  | 2.1730490  |
| H | 0.3785060  | 2.5701000  | 1.3248150  |
| H | -1.3788190 | 2.7630510  | 1.2982960  |
| H | -0.0343890 | -2.0444290 | -0.0000090 |

**HDMI 4 — P\* (S<sub>i</sub>) — G= -748.484366 au.**

|   |            |            |            |
|---|------------|------------|------------|
| C | 1.8274170  | 0.9259870  | 0.0062970  |
| C | 2.0348630  | -0.4852680 | -0.0026850 |
| C | 3.3206220  | -0.9859640 | -0.0056810 |
| C | 4.3871250  | -0.0822100 | 0.0010090  |
| C | 4.1689250  | 1.3186780  | 0.0106180  |
| C | 2.8977380  | 1.8479650  | 0.0134490  |
| C | -0.2568450 | -0.0064030 | -0.0019760 |
| H | 3.5071460  | -2.0554590 | -0.0124410 |
| H | 5.4054140  | -0.4555680 | -0.0006760 |
| H | 5.0259160  | 1.9831250  | 0.0158330  |
| H | 2.7156310  | 2.9164430  | 0.0208170  |
| C | -1.6635070 | -0.0145200 | -0.0034330 |
| C | -2.4742930 | 1.1936190  | -0.0070760 |
| C | -2.3934070 | -1.2425960 | 0.0016790  |
| C | -3.8630630 | 1.1389080  | 0.0062770  |
| C | -3.7689180 | -1.2781350 | 0.0113560  |
| H | -1.8490150 | -2.1759200 | 0.0000540  |
| C | -4.5177590 | -0.0838240 | 0.0158170  |
| H | -4.4245830 | 2.0689530  | 0.0062290  |
| H | -4.2794090 | -2.2346870 | 0.0164810  |
| H | -5.6015330 | -0.1159840 | 0.0248950  |
| N | 0.5018200  | 1.1697820  | 0.0071230  |
| O | -1.8288040 | 2.3719890  | -0.0267290 |
| H | -2.4553780 | 3.1155420  | -0.0286310 |
| C | 0.7016440  | -1.1992420 | -0.0051790 |
| C | 0.5924030  | -2.0668190 | -1.2803250 |
| H | -0.3526370 | -2.6113190 | -1.3244910 |
| H | 0.6802360  | -1.4475580 | -2.1764810 |
| H | 1.4038050  | -2.8009090 | -1.2835010 |
| C | 0.5942790  | -2.0733750 | 1.2661100  |
| H | 0.6800400  | -1.4582040 | 2.1652990  |
| H | -0.3488510 | -2.6212700 | 1.3076210  |
| H | 1.4081510  | -2.8047380 | 1.2657660  |
| H | 0.0794110  | 2.0923610  | 0.0096570  |

**HDMI 4 — D (S<sub>i</sub>) — G= -747.696325 au.**

|   |            |            |           |
|---|------------|------------|-----------|
| C | -0.8930130 | -1.9228710 | 0.0000000 |
| C | 0.5036460  | -2.0126850 | 0.0000000 |
| C | 1.1359320  | -3.2432080 | 0.0000000 |
| C | 0.3488330  | -4.4030200 | 0.0000000 |
| C | -1.0439310 | -4.3113060 | 0.0000000 |
| C | -1.6838160 | -3.0690620 | 0.0000000 |
| C | -0.2837140 | 0.1891960  | 0.0000000 |
| H | 2.2216840  | -3.3157300 | 0.0000000 |
| H | 0.8246850  | -5.3790910 | 0.0000000 |
| H | -1.6399110 | -5.2196080 | 0.0000000 |
| H | -2.7668840 | -2.9912130 | 0.0000000 |
| C | -0.4528860 | 1.6454250  | 0.0000000 |
| C | 0.6307700  | 2.6150480  | 0.0000000 |
| C | -1.7906500 | 2.1127740  | 0.0000000 |
| C | 0.2150630  | 4.0034220  | 0.0000000 |
| C | -2.1338990 | 3.4471550  | 0.0000000 |
| H | -2.5707940 | 1.3580190  | 0.0000000 |
| C | -1.0960800 | 4.4039170  | 0.0000000 |
| H | 1.0234120  | 4.7309950  | 0.0000000 |
| H | -3.1752850 | 3.7532870  | 0.0000000 |
| H | -1.3366740 | 5.4657750  | 0.0000000 |
| N | -1.3355020 | -0.5934880 | 0.0000000 |
| O | 1.8675740  | 2.3452270  | 0.0000000 |

|   |           |            |            |
|---|-----------|------------|------------|
| C | 1.0433270 | -0.6030440 | 0.0000000  |
| C | 1.8675740 | -0.3563030 | 1.2740920  |
| H | 2.2011410 | 0.6807260  | 1.3002030  |
| H | 1.2698960 | -0.5807070 | 2.1641370  |
| H | 2.7386150 | -1.0223510 | 1.2760040  |
| C | 1.8675740 | -0.3563030 | -1.2740920 |
| H | 1.2698960 | -0.5807070 | -2.1641370 |
| H | 2.2011410 | 0.6807260  | -1.3002030 |
| H | 2.7386150 | -1.0223510 | -1.2760040 |

**HDMI 4 —  $D^*(S_j)$  —  $G = -747.592567$  au.**

|   |            |            |            |
|---|------------|------------|------------|
| C | -0.9834820 | -1.8561650 | 0.0000000  |
| C | 0.4294140  | -2.0173760 | 0.0000000  |
| C | 1.0049700  | -3.2731030 | 0.0000000  |
| C | 0.1760500  | -4.4056590 | 0.0000000  |
| C | -1.2215560 | -4.2535320 | 0.0000000  |
| C | -1.8161570 | -3.0006600 | 0.0000000  |
| C | -0.2357550 | 0.2140800  | 0.0000000  |
| H | 2.0880440  | -3.3881100 | 0.0000000  |
| H | 0.6118830  | -5.4000530 | 0.0000000  |
| H | -1.8500140 | -5.1407890 | 0.0000000  |
| H | -2.8964940 | -2.8874960 | 0.0000000  |
| C | -0.4129510 | 1.6354920  | 0.0000000  |
| C | 0.7016050  | 2.6194370  | 0.0000000  |
| C | -1.7334810 | 2.1623870  | 0.0000000  |
| C | 0.3666360  | 4.0162710  | 0.0000000  |
| C | -1.9939720 | 3.5271850  | 0.0000000  |
| H | -2.5512920 | 1.4520680  | 0.0000000  |
| C | -0.9414290 | 4.4660910  | 0.0000000  |
| H | 1.2069410  | 4.7048540  | 0.0000000  |
| H | -3.0245460 | 3.8723570  | 0.0000000  |
| H | -1.1596430 | 5.5305750  | 0.0000000  |
| N | -1.3640890 | -0.5564820 | 0.0000000  |
| O | 1.9053470  | 2.2529450  | 0.0000000  |
| C | 1.0492320  | -0.6380020 | 0.0000000  |
| C | 1.9053470  | -0.4589850 | 1.2682420  |
| H | 2.3206880  | 0.5497210  | 1.3001370  |
| H | 1.2977360  | -0.6293410 | 2.1633910  |
| H | 2.7226150  | -1.1916040 | 1.2706110  |
| C | 1.9053470  | -0.4589850 | -1.2682420 |
| H | 1.2977360  | -0.6293410 | -2.1633910 |
| H | 2.3206880  | 0.5497210  | -1.3001370 |
| H | 2.7226150  | -1.1916040 | -1.2706110 |

**HBI —  $E(S_0)$  —  $G = -685.724167$  au.**

|   |            |            |            |
|---|------------|------------|------------|
| C | 1.1784210  | 1.5995870  | 0.0000000  |
| C | 2.0917470  | 0.5273730  | 0.0000000  |
| C | 3.4732740  | 0.7199770  | 0.0000000  |
| C | 3.9168470  | 2.0347050  | 0.0000000  |
| C | 3.0163940  | 3.1182030  | 0.0000000  |
| C | 1.6444740  | 2.9189130  | 0.0000000  |
| C | -0.0000000 | -0.2109390 | 0.0000000  |
| H | 4.1649490  | -0.1155860 | 0.0000000  |
| H | 4.9836920  | 2.2331110  | 0.0000000  |
| H | 3.4091650  | 4.1297610  | 0.0000000  |
| H | 0.9464870  | 3.7494980  | 0.0000000  |
| C | -1.1430810 | -1.1224020 | -0.0000000 |
| C | -2.4524180 | -0.5884420 | -0.0000000 |
| C | -0.9785250 | -2.5154170 | -0.0000000 |
| C | -3.5487630 | -1.4596590 | -0.0000000 |
| C | -2.0682470 | -3.3702690 | -0.0000000 |

|   |            |            |            |
|---|------------|------------|------------|
| H | 0.0206160  | -2.9413380 | 0.0000000  |
| C | -3.3588420 | -2.8319590 | -0.0000000 |
| H | -4.5424710 | -1.0242420 | -0.0000000 |
| H | -1.9178220 | -4.4439660 | -0.0000000 |
| H | -4.2218060 | -3.4905590 | -0.0000000 |
| N | -0.1117810 | 1.1055800  | -0.0000000 |
| O | -2.7066960 | 0.7308460  | -0.0000000 |
| H | -1.8406820 | 1.2173390  | -0.0000000 |
| N | 1.3082210  | -0.6084020 | 0.0000000  |
| H | 1.6486740  | -1.5590550 | 0.0000000  |

**HBI — E\* (S<sub>j</sub>) — G= -685.583031au.**

|   |            |            |            |
|---|------------|------------|------------|
| C | 1.0996030  | 1.6286280  | -0.0000000 |
| C | 2.0806290  | 0.5705930  | -0.0000000 |
| C | 3.4507160  | 0.8220050  | -0.0000000 |
| C | 3.8421180  | 2.1614310  | -0.0000000 |
| C | 2.8977600  | 3.2137610  | -0.0000000 |
| C | 1.5337000  | 2.9763500  | -0.0000000 |
| C | 0.0000000  | -0.2585310 | 0.0000000  |
| H | 4.1742260  | 0.0146340  | -0.0000000 |
| H | 4.9000350  | 2.4031230  | -0.0000000 |
| H | 3.2597010  | 4.2371920  | -0.0000000 |
| H | 0.8082810  | 3.7819560  | -0.0000000 |
| C | -1.0586020 | -1.1610670 | 0.0000000  |
| C | -2.4375370 | -0.6482630 | 0.0000000  |
| C | -0.8951180 | -2.5855740 | 0.0000000  |
| C | -3.5207960 | -1.5268550 | 0.0000000  |
| C | -1.9918870 | -3.4194750 | 0.0000000  |
| H | 0.1030190  | -3.0101860 | 0.0000000  |
| C | -3.3106850 | -2.9041220 | 0.0000000  |
| H | -4.5173250 | -1.0983560 | 0.0000000  |
| H | -1.8424860 | -4.4947250 | 0.0000000  |
| H | -4.1569060 | -3.5823200 | 0.0000000  |
| N | -0.1372970 | 1.1122100  | -0.0000000 |
| O | -2.6731790 | 0.6530920  | 0.0000000  |
| H | -1.7888780 | 1.1484840  | 0.0000000  |
| N | 1.3600790  | -0.5863390 | -0.0000000 |
| H | 1.7468810  | -1.5189130 | -0.0000000 |

**HBI — K\* (S<sub>j</sub>) — G= -685.596701au.**

|   |            |            |            |
|---|------------|------------|------------|
| C | 0.8855590  | -1.8319140 | -0.0000000 |
| C | 1.9527690  | -0.9014220 | -0.0000000 |
| C | 3.2805180  | -1.3180460 | -0.0000000 |
| C | 3.5126500  | -2.6957320 | -0.0000000 |
| C | 2.4582190  | -3.6169070 | -0.0000000 |
| C | 1.1245810  | -3.2054520 | -0.0000000 |
| C | 0.0000000  | 0.2459370  | -0.0000000 |
| H | 4.0951360  | -0.6026710 | -0.0000000 |
| H | 4.5352300  | -3.0580930 | -0.0000000 |
| H | 2.6817080  | -4.6786880 | -0.0000000 |
| H | 0.3062470  | -3.9161890 | -0.0000000 |
| C | -0.9257510 | 1.3171770  | 0.0000000  |
| C | -2.3840180 | 1.0103740  | 0.0000000  |
| C | -0.5223520 | 2.6589780  | 0.0000000  |
| C | -3.2914500 | 2.1116140  | 0.0000000  |
| C | -1.4693160 | 3.6996520  | 0.0000000  |
| H | 0.5317630  | 2.9192370  | -0.0000000 |
| C | -2.8448380 | 3.4330420  | 0.0000000  |
| H | -4.3488950 | 1.8667230  | 0.0000000  |
| H | -1.1161690 | 4.7260790  | 0.0000000  |
| H | -3.5557700 | 4.2525310  | 0.0000000  |

|   |            |            |            |
|---|------------|------------|------------|
| N | -0.2720600 | -1.1007940 | 0.0000000  |
| O | -2.7710480 | -0.1879820 | 0.0000000  |
| N | 1.3771660  | 0.3490410  | -0.0000000 |
| H | 1.8861790  | 1.2211940  | -0.0000000 |
| H | -1.2422170 | -1.4077930 | 0.0000000  |

**HBI — TS\* ( $S_T$ ) —  $G = -685.584196$  au,  $v = 1260.7$  i cm<sup>-1</sup>**

|   |            |            |            |
|---|------------|------------|------------|
| C | 1.2939280  | -1.4482400 | -0.0000000 |
| C | 2.1482030  | -0.2987810 | -0.0000000 |
| C | 3.5361520  | -0.4093760 | -0.0000000 |
| C | 4.0674440  | -1.7007860 | -0.0000000 |
| C | 3.2394950  | -2.8382510 | -0.0000000 |
| C | 1.8530120  | -2.7379550 | -0.0000000 |
| C | -0.0000000 | 0.3393430  | 0.0000000  |
| H | 4.1719440  | 0.4690760  | -0.0000000 |
| H | 5.1448920  | -1.8291050 | -0.0000000 |
| H | 3.6988880  | -3.8217390 | -0.0000000 |
| H | 1.2146380  | -3.6141490 | -0.0000000 |
| C | -1.1866730 | 1.0770800  | 0.0000000  |
| C | -2.4551190 | 0.3001560  | 0.0000000  |
| C | -1.2795300 | 2.4917790  | 0.0000000  |
| C | -3.6888750 | 0.9809390  | 0.0000000  |
| C | -2.5217240 | 3.1130380  | 0.0000000  |
| H | -0.3769840 | 3.0940900  | 0.0000000  |
| C | -3.7273150 | 2.3714990  | 0.0000000  |
| H | -4.5910640 | 0.3787580  | 0.0000000  |
| H | -2.5678330 | 4.1977000  | 0.0000000  |
| H | -4.6790360 | 2.8910830  | 0.0000000  |
| N | 0.0068360  | -1.0327810 | -0.0000000 |
| O | -2.4088910 | -0.9935580 | 0.0000000  |
| H | -1.2705790 | -1.3111950 | 0.0000000  |
| N | 1.3137710  | 0.7893600  | -0.0000000 |
| H | 1.6080310  | 1.7552140  | -0.0000000 |

**HBO — E ( $S_0$ ) —  $G = -705.586834$  au.**

|   |            |            |            |
|---|------------|------------|------------|
| C | 0.5135320  | 1.9461380  | 0.0000000  |
| C | 1.6979840  | 1.2078430  | 0.0000000  |
| C | 2.9614020  | 1.7733790  | 0.0000000  |
| C | 2.9935780  | 3.1659910  | 0.0000000  |
| C | 1.8157640  | 3.9321640  | 0.0000000  |
| C | 0.5575850  | 3.3397990  | 0.0000000  |
| C | -0.0000000 | -0.1282030 | -0.0000000 |
| H | 3.8613250  | 1.1698400  | 0.0000000  |
| H | 3.9536890  | 3.6709250  | 0.0000000  |
| H | 1.8929030  | 5.0143310  | 0.0000000  |
| H | -0.3531540 | 3.9282060  | 0.0000000  |
| C | -0.6893010 | -1.4062280 | -0.0000000 |
| C | -2.1008760 | -1.4308710 | -0.0000000 |
| C | 0.0286920  | -2.6117840 | -0.0000000 |
| C | -2.7586650 | -2.6662080 | -0.0000000 |
| C | -0.6322450 | -3.8275620 | -0.0000000 |
| H | 1.1131480  | -2.5724760 | -0.0000000 |
| C | -2.0319280 | -3.8461050 | -0.0000000 |
| H | -3.8434050 | -2.6671420 | -0.0000000 |
| H | -0.0700450 | -4.7545100 | -0.0000000 |
| H | -2.5597980 | -4.7946930 | -0.0000000 |
| N | -0.5524250 | 1.0498160  | 0.0000000  |
| O | -2.8570430 | -0.3194030 | -0.0000000 |
| H | -2.2711490 | 0.4732340  | 0.0000000  |
| O | 1.3583350  | -0.1189160 | -0.0000000 |



**HBO — E\* ( $S_l$ ) —  $G = -705.446564$  au.**

|   |            |            |            |
|---|------------|------------|------------|
| C | 0.7675480  | 1.8326530  | 0.0000000  |
| C | 1.8720820  | 0.9262950  | 0.0000000  |
| C | 3.1917280  | 1.3226960  | 0.0000000  |
| C | 3.4135940  | 2.7071290  | 0.0000000  |
| C | 2.3452990  | 3.6287800  | 0.0000000  |
| C | 1.0203000  | 3.2250080  | 0.0000000  |
| C | -0.0000000 | -0.1831660 | -0.0000000 |
| H | 4.0031260  | 0.6046330  | 0.0000000  |
| H | 4.4327110  | 3.0787600  | 0.0000000  |
| H | 2.5756650  | 4.6894750  | 0.0000000  |
| H | 0.2004190  | 3.9337870  | 0.0000000  |
| C | -0.8348560 | -1.2915950 | -0.0000000 |
| C | -2.2915320 | -1.0899930 | -0.0000000 |
| C | -0.3532330 | -2.6359920 | -0.0000000 |
| C | -3.1535810 | -2.1864510 | -0.0000000 |
| C | -1.2392800 | -3.6918710 | -0.0000000 |
| H | 0.7175480  | -2.8032470 | -0.0000000 |
| C | -2.6411160 | -3.4799920 | -0.0000000 |
| H | -4.2204700 | -1.9913320 | -0.0000000 |
| H | -0.8574090 | -4.7078540 | -0.0000000 |
| H | -3.3154110 | -4.3292230 | -0.0000000 |
| N | -0.3761440 | 1.1278420  | -0.0000000 |
| O | -2.8064190 | 0.1282760  | -0.0000000 |
| H | -2.0677030 | 0.8083720  | -0.0000000 |
| O | 1.3792710  | -0.3381850 | 0.0000000  |

**HBO — K\* ( $S_l$ ) —  $G = -705.454711$  au.**

|   |            |            |            |
|---|------------|------------|------------|
| C | 0.4844910  | -1.9904720 | -0.0000000 |
| C | 1.6727580  | -1.2419850 | -0.0000000 |
| C | 2.9261460  | -1.8171760 | -0.0000000 |
| C | 2.9584990  | -3.2175710 | -0.0000000 |
| C | 1.7822680  | -3.9756620 | -0.0000000 |
| C | 0.5183280  | -3.3836880 | -0.0000000 |
| C | -0.0000000 | 0.1903220  | 0.0000000  |
| H | 3.8257740  | -1.2135970 | -0.0000000 |
| H | 3.9180680  | -3.7226960 | -0.0000000 |
| H | 1.8526630  | -5.0583210 | -0.0000000 |
| H | -0.3912970 | -3.9721720 | 0.0000000  |
| C | -0.6575720 | 1.4401310  | 0.0000000  |
| C | -2.1429210 | 1.4578640  | 0.0000000  |
| C | 0.0449220  | 2.6433120  | -0.0000000 |
| C | -2.7771160 | 2.7349270  | 0.0000000  |
| C | -0.6449480 | 3.8768830  | 0.0000000  |
| H | 1.1299400  | 2.6327070  | -0.0000000 |
| C | -2.0416010 | 3.9240720  | 0.0000000  |
| H | -3.8625860 | 2.7386070  | 0.0000000  |
| H | -0.0691300 | 4.7967160  | 0.0000000  |
| H | -2.5520650 | 4.8812340  | 0.0000000  |
| N | -0.5274210 | -1.0643680 | 0.0000000  |
| O | -2.7802890 | 0.3705950  | 0.0000000  |
| O | 1.3606530  | 0.0912180  | -0.0000000 |
| H | -1.5418480 | -1.1721500 | 0.0000000  |

**HBO — TS\* ( $S_l$ ) —  $G = -705.445825$  au,  $v = 1269.2$  i cm<sup>-1</sup>**

|   |           |            |            |
|---|-----------|------------|------------|
| C | 1.8543590 | -0.6290160 | -0.0001070 |
| C | 1.9557070 | 0.7847450  | -0.0000040 |
| C | 3.1557870 | 1.4628020  | 0.0000080  |
| C | 4.3104160 | 0.6686010  | -0.0000890 |
| C | 4.2350720 | -0.7329190 | -0.0001920 |

|   |            |            |            |
|---|------------|------------|------------|
| C | 3.0193240  | -1.4101330 | -0.0002040 |
| C | -0.1507520 | 0.2372470  | 0.0000220  |
| H | 3.1955040  | 2.5456890  | 0.0000880  |
| H | 5.2825450  | 1.1495410  | -0.0000850 |
| H | 5.1562580  | -1.3067650 | -0.0002650 |
| H | 2.9649010  | -2.4924360 | -0.0002830 |
| C | -1.5453300 | 0.3174930  | 0.0000740  |
| C | -2.2715250 | -0.9814120 | -0.0000040 |
| C | -2.2971160 | 1.5060210  | 0.0001910  |
| C | -3.6831710 | -0.9795890 | 0.0000450  |
| C | -3.6917200 | 1.4495240  | 0.0002340  |
| H | -1.7831450 | 2.4608030  | 0.0002490  |
| C | -4.3881860 | 0.2197690  | 0.0001630  |
| H | -4.1834000 | -1.9420050 | -0.0000140 |
| H | -4.2546550 | 2.3775230  | 0.0003260  |
| H | -5.4722760 | 0.2148960  | 0.0001990  |
| N | 0.5311690  | -0.9365250 | -0.0000880 |
| O | -1.5988790 | -2.0827490 | -0.0001140 |
| H | -0.4153980 | -1.7991700 | -0.0001270 |
| O | 0.6956670  | 1.3163490  | 0.0000770  |

**HBT — E ( $S_0$ ) —  $G = -1028.555265$  au.**

|   |            |            |           |
|---|------------|------------|-----------|
| C | -0.5475250 | 1.8613250  | 0.0000000 |
| C | -1.8479470 | 1.3244250  | 0.0000000 |
| C | -2.9743330 | 2.1473300  | 0.0000000 |
| C | -2.7751820 | 3.5212060  | 0.0000000 |
| C | -1.4810280 | 4.0667560  | 0.0000000 |
| C | -0.3629140 | 3.2487520  | 0.0000000 |
| C | -0.0000000 | -0.2989050 | 0.0000000 |
| H | -3.9741390 | 1.7270530  | 0.0000000 |
| H | -3.6352520 | 4.1826070  | 0.0000000 |
| H | -1.3566230 | 5.1445170  | 0.0000000 |
| H | 0.6428290  | 3.6554410  | 0.0000000 |
| C | 0.8558310  | -1.4834720 | 0.0000000 |
| C | 2.2634660  | -1.3373330 | 0.0000000 |
| C | 0.3097280  | -2.7775030 | 0.0000000 |
| C | 3.0728520  | -2.4806730 | 0.0000000 |
| C | 1.1160250  | -3.9015030 | 0.0000000 |
| H | -0.7706820 | -2.8980160 | 0.0000000 |
| C | 2.5067040  | -3.7441480 | 0.0000000 |
| H | 4.1485140  | -2.3399170 | 0.0000000 |
| H | 0.6727960  | -4.8908190 | 0.0000000 |
| H | 3.1513440  | -4.6175480 | 0.0000000 |
| N | 0.4638260  | 0.9171560  | 0.0000000 |
| O | 2.8804980  | -0.1447020 | 0.0000000 |
| H | 2.1919380  | 0.5648200  | 0.0000000 |
| S | -1.7609730 | -0.4167590 | 0.0000000 |

**HBT — E\* ( $S_l$ ) —  $G = -1028.423091$  au.**

|   |            |            |           |
|---|------------|------------|-----------|
| C | -0.5941130 | 1.8175710  | 0.0000000 |
| C | -1.9052940 | 1.2266790  | 0.0000000 |
| C | -3.0549900 | 2.0054740  | 0.0000000 |
| C | -2.9176930 | 3.3919390  | 0.0000000 |
| C | -1.6392560 | 3.9914010  | 0.0000000 |
| C | -0.4877640 | 3.2346930  | 0.0000000 |
| C | -0.0000000 | -0.3462020 | 0.0000000 |
| H | -4.0373010 | 1.5447110  | 0.0000000 |
| H | -3.8039320 | 4.0173980  | 0.0000000 |
| H | -1.5653130 | 5.0744170  | 0.0000000 |
| H | 0.4969930  | 3.6892890  | 0.0000000 |
| C | 0.8684620  | -1.4420070 | 0.0000000 |

|   |            |            |           |
|---|------------|------------|-----------|
| C | 2.3252980  | -1.2139510 | 0.0000000 |
| C | 0.4291160  | -2.7976630 | 0.0000000 |
| C | 3.2139880  | -2.2952170 | 0.0000000 |
| C | 1.3355420  | -3.8374530 | 0.0000000 |
| H | -0.6364880 | -3.0058260 | 0.0000000 |
| C | 2.7319820  | -3.5958030 | 0.0000000 |
| H | 4.2757790  | -2.0741460 | 0.0000000 |
| H | 0.9735870  | -4.8604500 | 0.0000000 |
| H | 3.4237760  | -4.4309600 | 0.0000000 |
| N | 0.4249710  | 0.9520570  | 0.0000000 |
| O | 2.8105030  | 0.0091170  | 0.0000000 |
| H | 2.0317680  | 0.6683310  | 0.0000000 |
| S | -1.7780850 | -0.5123050 | 0.0000000 |

**HBT — K\* ( $S_I$ ) —  $G = -1028.433139$  au.**

|   |            |            |            |
|---|------------|------------|------------|
| C | -0.5532160 | -1.8939980 | -0.0000000 |
| C | -1.8453410 | -1.3249690 | -0.0000000 |
| C | -2.9813800 | -2.1252300 | -0.0000000 |
| C | -2.8148360 | -3.5084360 | -0.0000000 |
| C | -1.5320080 | -4.0751040 | -0.0000000 |
| C | -0.3910190 | -3.2868530 | -0.0000000 |
| C | 0.0000000  | 0.3556670  | -0.0000000 |
| H | -3.9710880 | -1.6814440 | -0.0000000 |
| H | -3.6881060 | -4.1513540 | -0.0000000 |
| H | -1.4268840 | -5.1550910 | -0.0000000 |
| H | 0.6022180  | -3.7219910 | 0.0000000  |
| C | 0.8538100  | 1.4968390  | 0.0000000  |
| C | 2.3300890  | 1.3097830  | 0.0000000  |
| C | 0.3447280  | 2.7948970  | 0.0000000  |
| C | 3.1390180  | 2.4888090  | 0.0000000  |
| C | 1.1949420  | 3.9183310  | 0.0000000  |
| H | -0.7306240 | 2.9546820  | -0.0000000 |
| C | 2.5856430  | 3.7655010  | 0.0000000  |
| H | 4.2133440  | 2.3344030  | 0.0000000  |
| H | 0.7542680  | 4.9098560  | 0.0000000  |
| H | 3.2279600  | 4.6399180  | 0.0000000  |
| N | 0.4236490  | -0.9426880 | 0.0000000  |
| O | 2.8306440  | 0.1532720  | 0.0000000  |
| S | -1.7509150 | 0.4273860  | -0.0000000 |
| H | 1.4402770  | -1.0859290 | 0.0000000  |

**HBT — TS\* ( $S_I$ ) —  $G = -1028.424663$  au,  $v = 1177.3$   $i$   $\text{cm}^{-1}$**

|   |            |            |            |
|---|------------|------------|------------|
| C | -0.8318640 | -1.6986190 | 0.0000000  |
| C | -2.0548190 | -0.9616610 | 0.0000000  |
| C | -3.2874190 | -1.6020380 | 0.0000000  |
| C | -3.3112370 | -2.9953550 | 0.0000000  |
| C | -2.1134760 | -3.7333030 | 0.0000000  |
| C | -0.8793830 | -3.1102640 | 0.0000000  |
| C | 0.0000000  | 0.4098350  | -0.0000000 |
| H | -4.2093340 | -1.0298930 | 0.0000000  |
| H | -4.2637430 | -3.5140780 | 0.0000000  |
| H | -2.1597210 | -4.8178010 | 0.0000000  |
| H | 0.0458060  | -3.6762510 | 0.0000000  |
| C | 1.0377430  | 1.3593780  | -0.0000000 |
| C | 2.4323310  | 0.8489140  | -0.0000000 |
| C | 0.8519520  | 2.7558240  | -0.0000000 |
| C | 3.5093380  | 1.7630500  | -0.0000000 |
| C | 1.9444480  | 3.6172410  | -0.0000000 |

|   |            |            |            |
|---|------------|------------|------------|
| H | -0.1564520 | 3.1592210  | -0.0000000 |
| C | 3.2719110  | 3.1287150  | -0.0000000 |
| H | 4.5127350  | 1.3510660  | -0.0000000 |
| H | 1.7725340  | 4.6887300  | -0.0000000 |
| H | 4.1019620  | 3.8264550  | -0.0000000 |
| N | 0.2724860  | -0.9268430 | -0.0000000 |
| O | 2.6434320  | -0.4259750 | -0.0000000 |
| H | 1.5867460  | -0.9485050 | -0.0000000 |
| S | -1.7314090 | 0.7604030  | 0.0000000  |

**HDMI 6** —  $E(S_0)$  —  $G = -1242.056643$  au.

|   |            |            |            |
|---|------------|------------|------------|
| C | -1.8549230 | -0.0746110 | 0.0053640  |
| C | -2.8117690 | 1.1280670  | 0.0342890  |
| C | -4.1309790 | 0.3890660  | 0.0091690  |
| C | -5.4383570 | 0.8464630  | 0.0164090  |
| C | -6.4704090 | -0.0971140 | -0.0132850 |
| C | -6.1912060 | -1.4657210 | -0.0490200 |
| C | -4.8756020 | -1.9303730 | -0.0560190 |
| C | -3.8631490 | -0.9804080 | -0.0262870 |
| H | -5.6639490 | 1.9094870  | 0.0443180  |
| H | -7.5026310 | 0.2379520  | -0.0085260 |
| H | -7.0098720 | -2.1778560 | -0.0717100 |
| H | -4.6447180 | -2.9901340 | -0.0837650 |
| C | -0.3889710 | -0.0324800 | 0.0087580  |
| C | 0.3091190  | 1.1815500  | 0.0248290  |
| C | 0.3548520  | -1.2449220 | -0.0057410 |
| C | 1.6986600  | 1.2381300  | 0.0239430  |
| H | -0.2446460 | 2.1106700  | 0.0661890  |
| C | 1.7670660  | -1.2027440 | -0.0058790 |
| C | 2.4070810  | 0.0310200  | 0.0078250  |
| C | -2.6919720 | 1.9438170  | 1.3344650  |
| H | -1.7464220 | 2.4867660  | 1.3988650  |
| H | -3.5045290 | 2.6757980  | 1.3711340  |
| H | -2.7778030 | 1.2924510  | 2.2087140  |
| C | -2.6851290 | 2.0167800  | -1.2166110 |
| H | -3.5021500 | 2.7447540  | -1.2198140 |
| H | -1.7431300 | 2.5695610  | -1.2407710 |
| H | -2.7577790 | 1.4158150  | -2.1273660 |
| O | -0.2345630 | -2.4411390 | -0.0379560 |
| H | -1.2269330 | -2.2926610 | -0.0478140 |
| N | -2.4742270 | -1.2167760 | -0.0269020 |
| H | 3.4938480  | 0.0507320  | 0.0019090  |
| C | 2.5760150  | -2.4468270 | -0.0458550 |
| C | 2.2816880  | -3.5622850 | 0.7447090  |
| C | 3.7083920  | -2.5264740 | -0.8616930 |
| C | 3.1192910  | -4.6703940 | 0.6862360  |
| H | 1.4175830  | -3.5662620 | 1.3977570  |
| C | 4.4787020  | -3.6846880 | -0.8468240 |
| H | 3.9802610  | -1.7038740 | -1.5156650 |
| N | 4.2048810  | -4.7507510 | -0.0903740 |
| H | 2.9051460  | -5.5417470 | 1.3010290  |
| H | 5.3595120  | -3.7577150 | -1.4807850 |
| C | 2.4059740  | 2.5386190  | 0.0432350  |
| C | 1.8973680  | 3.6556740  | -0.6272300 |
| C | 3.6120670  | 2.7071250  | 0.7306280  |
| C | 2.5963560  | 4.8563780  | -0.5754530 |
| H | 0.9812340  | 3.5892210  | -1.2059780 |
| C | 4.2344200  | 3.9505720  | 0.7154650  |
| H | 4.0534720  | 1.8899480  | 1.2920590  |
| N | 3.7494780  | 5.0215100  | 0.0797630  |

|   |           |           |            |
|---|-----------|-----------|------------|
| H | 2.2110420 | 5.7298230 | -1.0965720 |
| H | 5.1705460 | 4.0931890 | 1.2504760  |

**HDMI 6 —  $K^*(S_j)$  —  $G = -1241.952004$  au.**

|   |            |            |            |
|---|------------|------------|------------|
| C | -1.8334220 | -0.0857130 | -0.0367660 |
| C | -2.8249890 | 1.0758750  | 0.0368790  |
| C | -4.1460590 | 0.3283310  | 0.0339160  |
| C | -5.4474270 | 0.7929810  | 0.0904180  |
| C | -6.4951770 | -0.1350640 | 0.0653330  |
| C | -6.2318150 | -1.5071440 | -0.0162400 |
| C | -4.9290940 | -1.9932930 | -0.0747140 |
| C | -3.9003630 | -1.0505170 | -0.0472720 |
| H | -5.6577470 | 1.8575930  | 0.1527750  |
| H | -7.5220730 | 0.2119480  | 0.1090680  |
| H | -7.0594310 | -2.2090610 | -0.0343780 |
| H | -4.7197920 | -3.0556790 | -0.1379590 |
| C | -0.4074460 | -0.0361880 | -0.0387480 |
| C | 0.2829170  | 1.1705150  | -0.0290350 |
| C | 0.3884570  | -1.3014650 | -0.0509610 |
| C | 1.7026750  | 1.2399870  | 0.0096730  |
| H | -0.2665730 | 2.1016520  | -0.0068040 |
| C | 1.8397260  | -1.1985220 | -0.0087440 |
| C | 2.4517010  | 0.0617150  | 0.0215330  |
| C | -2.6910160 | 1.8925830  | 1.3391840  |
| H | -1.7473930 | 2.4407560  | 1.3849630  |
| H | -3.5083110 | 2.6186550  | 1.3924100  |
| H | -2.7543620 | 1.2371740  | 2.2118310  |
| C | -2.7541410 | 1.9943670  | -1.2028830 |
| H | -3.5758900 | 2.7161070  | -1.1602090 |
| H | -1.8162260 | 2.5525690  | -1.2497310 |
| H | -2.8556130 | 1.4094760  | -2.1208800 |
| O | -0.1885680 | -2.4053720 | -0.1254120 |
| H | -2.0385160 | -2.1352330 | -0.1437740 |
| N | -2.5375960 | -1.2467370 | -0.0910960 |
| H | 3.5341420  | 0.1224870  | 0.0549030  |
| C | 2.6635010  | -2.4105360 | -0.0306650 |
| C | 2.2682690  | -3.6271590 | 0.5549410  |
| C | 3.9390620  | -2.3972910 | -0.6248660 |
| C | 3.1340680  | -4.7123570 | 0.5214130  |
| H | 1.3073780  | -3.7185780 | 1.0422210  |
| C | 4.7204900  | -3.5441020 | -0.6076040 |
| H | 4.3084870  | -1.5107790 | -1.1294170 |
| N | 4.3463390  | -4.6989490 | -0.0457610 |
| H | 2.8341830  | -5.6507540 | 0.9833490  |
| H | 5.7021230  | -3.5343080 | -1.0767350 |
| C | 2.3688050  | 2.5507400  | 0.0347740  |
| C | 1.7927290  | 3.6789470  | -0.5670120 |
| C | 3.6108710  | 2.7355110  | 0.6593620  |
| C | 2.4669410  | 4.8935360  | -0.5225870 |
| H | 0.8470140  | 3.6119710  | -1.0945230 |
| C | 4.1966630  | 3.9948230  | 0.6498230  |
| H | 4.1036950  | 1.9186050  | 1.1751800  |
| N | 3.6500030  | 5.0708670  | 0.0729090  |
| H | 2.0311510  | 5.7705520  | -0.9955000 |
| H | 5.1555210  | 4.1482020  | 1.1392330  |

**HDMI 6.2H<sup>+</sup> —  $E(S_0)$  —  $G = -1242.897491$  au.**

|   |           |            |            |
|---|-----------|------------|------------|
| C | 1.8875640 | -0.0317840 | -0.0183920 |
| C | 2.8420490 | 1.1683690  | 0.0093150  |
| C | 4.1597260 | 0.4254810  | 0.0093720  |
| C | 5.4675020 | 0.8815470  | 0.0255130  |

|   |            |            |            |
|---|------------|------------|------------|
| C | 6.4967520  | -0.0650000 | 0.0206410  |
| C | 6.2169470  | -1.4342290 | -0.0002040 |
| C | 4.9016750  | -1.8979900 | -0.0168490 |
| C | 3.8929060  | -0.9442410 | -0.0118880 |
| H | 5.6948320  | 1.9441330  | 0.0416000  |
| H | 7.5293310  | 0.2682420  | 0.0331780  |
| H | 7.0352500  | -2.1467660 | -0.0035480 |
| H | 4.6693790  | -2.9575280 | -0.0331770 |
| C | 0.4191600  | -0.0024780 | -0.0163470 |
| C | -0.2962020 | 1.1926520  | -0.0127220 |
| C | -0.3056010 | -1.2303530 | -0.0179010 |
| C | -1.6935620 | 1.2249540  | -0.0158510 |
| H | 0.2482450  | 2.1277700  | -0.0470320 |
| C | -1.7212770 | -1.2078860 | 0.0007580  |
| C | -2.3886210 | 0.0117730  | -0.0017500 |
| C | 2.7327710  | 2.0471800  | -1.2503190 |
| H | 1.7929150  | 2.6028790  | -1.2935090 |
| H | 3.5508770  | 2.7735360  | -1.2465520 |
| H | 2.8185030  | 1.4394750  | -2.1551730 |
| C | 2.7007840  | 1.9916090  | 1.3030030  |
| H | 3.5111620  | 2.7248760  | 1.3477280  |
| H | 1.7535790  | 2.5351300  | 1.3486220  |
| H | 2.7724570  | 1.3463710  | 2.1828340  |
| O | 0.3008920  | -2.4052720 | -0.0105930 |
| H | 1.3036710  | -2.2365980 | -0.0137930 |
| N | 2.5021480  | -1.1745130 | -0.0265480 |
| H | -3.4751230 | 0.0127530  | 0.0105940  |
| C | -2.4949490 | -2.4651680 | 0.0421100  |
| C | -2.1294660 | -3.5895390 | -0.7170140 |
| C | -3.6475600 | -2.5511010 | 0.8390090  |
| C | -2.9030370 | -4.7278090 | -0.6685920 |
| H | -1.2509800 | -3.5764970 | -1.3468960 |
| C | -4.3887350 | -3.7123100 | 0.8599930  |
| H | -3.9557280 | -1.7247040 | 1.4679800  |
| N | -3.9993790 | -4.7587860 | 0.1114040  |
| H | -2.6849680 | -5.6235000 | -1.2350090 |
| H | -5.2789270 | -3.8463730 | 1.4600800  |
| C | -2.4134070 | 2.5075510  | -0.0436430 |
| C | -1.8773800 | 3.6544750  | 0.5677510  |
| C | -3.6572310 | 2.6291940  | -0.6872970 |
| C | -2.5612510 | 4.8476450  | 0.5198720  |
| H | -0.9385660 | 3.6191880  | 1.1063700  |
| C | -4.3085240 | 3.8413260  | -0.7075550 |
| H | -4.1098260 | 1.7909430  | -1.2022260 |
| N | -3.7484990 | 4.9098210  | -0.1110160 |
| H | -2.2038820 | 5.7615610  | 0.9757970  |
| H | -5.2615820 | 4.0010180  | -1.1941440 |
| H | -4.5525790 | -5.6122080 | 0.1391430  |
| H | -4.2412480 | 5.7995970  | -0.1410880 |

**HDMI 6.2H<sup>+</sup> — K\* (S<sub>i</sub>) — G= -1242.801102 au.**

|   |            |            |            |
|---|------------|------------|------------|
| C | -1.8736210 | -0.0944770 | -0.0137570 |
| C | -2.8659480 | 1.0688860  | 0.0526770  |
| C | -4.1857550 | 0.3261650  | 0.0310670  |
| C | -5.4882860 | 0.7906500  | 0.0684750  |
| C | -6.5285700 | -0.1431900 | 0.0282700  |
| C | -6.2642230 | -1.5172940 | -0.0474940 |
| C | -4.9613870 | -2.0007880 | -0.0850620 |
| C | -3.9416150 | -1.0506760 | -0.0436210 |
| H | -5.7039950 | 1.8537400  | 0.1260140  |
| H | -7.5570550 | 0.2003940  | 0.0552730  |

|   |            |            |            |
|---|------------|------------|------------|
| H | -7.0915080 | -2.2183150 | -0.0774900 |
| H | -4.7461260 | -3.0619820 | -0.1435180 |
| C | -0.4529880 | -0.0329000 | -0.0056170 |
| C | 0.2335810  | 1.1872920  | 0.0145030  |
| C | 0.3460290  | -1.2926700 | -0.0241660 |
| C | 1.6436080  | 1.2421330  | 0.0384360  |
| H | -0.3183430 | 2.1150650  | 0.0572700  |
| C | 1.8181440  | -1.1966970 | 0.0146900  |
| C | 2.4130560  | 0.0673130  | 0.0477690  |
| C | -2.7453670 | 1.8703390  | 1.3659020  |
| H | -1.8065240 | 2.4241490  | 1.4275040  |
| H | -3.5670630 | 2.5904810  | 1.4150730  |
| H | -2.8160170 | 1.2063340  | 2.2311900  |
| C | -2.7762520 | 1.9882550  | -1.1846780 |
| H | -3.6019780 | 2.7046980  | -1.1502860 |
| H | -1.8418250 | 2.5524740  | -1.2153030 |
| H | -2.8622280 | 1.4063390  | -2.1058590 |
| O | -0.2136610 | -2.3905300 | -0.1094980 |
| H | -2.0947530 | -2.1441740 | -0.1226760 |
| N | -2.5720770 | -1.2456490 | -0.0685110 |
| H | 3.4933940  | 0.1468780  | 0.0765040  |
| C | 2.6242310  | -2.3975600 | -0.0245580 |
| C | 2.1872970  | -3.6557610 | 0.4738300  |
| C | 3.9469610  | -2.3504550 | -0.5470400 |
| C | 3.0202080  | -4.7430070 | 0.4414930  |
| H | 1.2057310  | -3.7716370 | 0.9068710  |
| C | 4.7360630  | -3.4686480 | -0.5685200 |
| H | 4.3435910  | -1.4432990 | -0.9845770 |
| N | 4.2679790  | -4.6383580 | -0.0756380 |
| H | 2.7388260  | -5.7149100 | 0.8248930  |
| H | 5.7382960  | -3.4818000 | -0.9760360 |
| C | 2.3189200  | 2.5468020  | 0.0398680  |
| C | 1.7396170  | 3.6591100  | -0.5977640 |
| C | 3.5610560  | 2.7263020  | 0.6750210  |
| C | 2.3896190  | 4.8725110  | -0.5931870 |
| H | 0.7988010  | 3.5784630  | -1.1278600 |
| C | 4.1734640  | 3.9588320  | 0.6563070  |
| H | 4.0413970  | 1.9185060  | 1.2123320  |
| N | 3.5776610  | 4.9896600  | 0.0274790  |
| H | 2.0019330  | 5.7608290  | -1.0740390 |
| H | 5.1231750  | 4.1633210  | 1.1324180  |
| H | 4.8656760  | -5.4581840 | -0.0952050 |
| H | 4.0439010  | 5.8945070  | 0.0231020  |

**HDMI 6 —  $D^*(S_j)$  —  $G = -1241.481006\text{au}$ .**

|   |            |            |            |
|---|------------|------------|------------|
| C | 1.8652840  | -0.0717920 | 0.0108820  |
| C | 2.8163860  | -1.2896470 | 0.0149080  |
| C | 4.1439260  | -0.5647920 | -0.0052320 |
| C | 5.4408060  | -1.0410750 | -0.0151700 |
| C | 6.5011490  | -0.1229170 | -0.0282880 |
| C | 6.2404410  | 1.2552940  | -0.0303010 |
| C | 4.9407470  | 1.7466110  | -0.0200780 |
| C | 3.8754610  | 0.8242700  | -0.0074630 |
| H | 5.6429950  | -2.1108050 | -0.0127600 |
| H | 7.5269050  | -0.4784070 | -0.0364720 |
| H | 7.0739770  | 1.9526620  | -0.0402580 |
| H | 4.7387120  | 2.8137450  | -0.0220420 |
| C | 0.4354630  | 0.0006930  | 0.0014340  |
| C | -0.1760360 | 1.2776460  | -0.0088450 |
| C | -0.4512340 | -1.1893300 | 0.0076300  |
| C | -1.5655680 | 1.4411700  | -0.0321100 |

|   |            |            |            |
|---|------------|------------|------------|
| H | 0.4760840  | 2.1405160  | -0.0429850 |
| C | -1.9050110 | -0.9854880 | -0.0140560 |
| C | -2.4127350 | 0.3127750  | -0.0373410 |
| C | 2.7270620  | -2.1333730 | 1.3005660  |
| H | 1.7671940  | -2.6460600 | 1.3606510  |
| H | 3.5335110  | -2.8767110 | 1.3064070  |
| H | 2.8512910  | -1.4955280 | 2.1818580  |
| C | 2.7004800  | -2.1690650 | -1.2434800 |
| H | 3.5084980  | -2.9106650 | -1.2469060 |
| H | 1.7416820  | -2.6869460 | -1.2671480 |
| H | 2.8022570  | -1.5565890 | -2.1453570 |
| O | 0.0273370  | -2.3357920 | 0.0666200  |
| N | 2.5398930  | 1.1018460  | 0.0030530  |
| H | -3.4871830 | 0.4621330  | -0.0605550 |
| C | -2.8142360 | -2.1293720 | 0.0329730  |
| C | -2.5184070 | -3.4003410 | -0.5053650 |
| C | -4.1010550 | -2.0048390 | 0.6016020  |
| C | -3.4683870 | -4.4091220 | -0.4530210 |
| H | -1.5613440 | -3.5890060 | -0.9708050 |
| C | -4.9718920 | -3.0831510 | 0.6034710  |
| H | -4.4087970 | -1.0784660 | 1.0752920  |
| N | -4.6899310 | -4.2868490 | 0.0873000  |
| H | -3.2340370 | -5.3829860 | -0.8801490 |
| H | -5.9572920 | -2.9752310 | 1.0541210  |
| C | -2.1530430 | 2.7935560  | -0.0478510 |
| C | -1.4959780 | 3.8861040  | 0.5369260  |
| C | -3.3924920 | 3.0617680  | -0.6468990 |
| C | -2.0892670 | 5.1419280  | 0.5006110  |
| H | -0.5433340 | 3.7544950  | 1.0383530  |
| C | -3.8963060 | 4.3561660  | -0.6297530 |
| H | -3.9499230 | 2.2778770  | -1.1483250 |
| N | -3.2718340 | 5.3981140  | -0.0690520 |
| H | -1.5857240 | 5.9899580  | 0.9600580  |
| H | -4.8544050 | 4.5685120  | -1.0995120 |

**HDMI 7 — E ( $S_0$ ) —  $G = -1717.404489$  au.**

|   |            |            |            |
|---|------------|------------|------------|
| C | -1.9839830 | 1.4852300  | 0.0000000  |
| C | -1.9874460 | 3.0212260  | 0.0000000  |
| C | -3.4807170 | 3.2596130  | 0.0000000  |
| C | -4.2227950 | 4.4292160  | 0.0000000  |
| C | -5.6178480 | 4.3284290  | 0.0000000  |
| C | -6.2479220 | 3.0813090  | 0.0000000  |
| C | -5.5040290 | 1.9009260  | 0.0000000  |
| C | -4.1203460 | 2.0187230  | 0.0000000  |
| H | -3.7408510 | 5.4035790  | 0.0000000  |
| H | -6.2199860 | 5.2313340  | 0.0000000  |
| H | -7.3320050 | 3.0301450  | 0.0000000  |
| H | -5.9802500 | 0.9260540  | 0.0000000  |
| C | -0.8081630 | 0.6082500  | 0.0000000  |
| C | 0.4942130  | 1.1196620  | 0.0000000  |
| C | -0.9826580 | -0.8029510 | 0.0000000  |
| C | 1.6164770  | 0.2891970  | 0.0000000  |
| H | 0.6552080  | 2.1895030  | 0.0000000  |
| C | 0.1513260  | -1.6494660 | 0.0000000  |
| C | 1.4296850  | -1.0993590 | 0.0000000  |
| C | -1.3597060 | 3.6102480  | 1.2763790  |
| H | -0.2808810 | 3.4463220  | 1.3219220  |
| H | -1.5379160 | 4.6897120  | 1.2956220  |
| H | -1.8149990 | 3.1715910  | 2.1687180  |
| C | -1.3597060 | 3.6102480  | -1.2763790 |
| H | -1.5379160 | 4.6897120  | -1.2956220 |



|    |            |            |            |
|----|------------|------------|------------|
| H  | -0.2808810 | 3.4463220  | -1.3219220 |
| H  | -1.8149990 | 3.1715910  | -2.1687180 |
| O  | -2.1776260 | -1.3845160 | 0.0000000  |
| H  | -2.8690980 | -0.6579620 | 0.0000000  |
| N  | -3.1773080 | 0.9714340  | 0.0000000  |
| H  | 2.2900240  | -1.7601380 | 0.0000000  |
| C  | -0.0319830 | -3.0691730 | 0.0000000  |
| C  | -0.1713780 | -4.2785870 | 0.0000000  |
| C  | 2.9358220  | 0.8487870  | 0.0000000  |
| C  | 4.0571770  | 1.3240250  | 0.0000000  |
| Si | -0.4021390 | -6.1138030 | 0.0000000  |
| Si | 5.7590230  | 2.0485170  | 0.0000000  |
| C  | -1.3597060 | -6.5912410 | -1.5426890 |
| H  | -1.5139410 | -7.6753410 | -1.5700290 |
| H  | -2.3413660 | -6.1083960 | -1.5630850 |
| H  | -0.8185260 | -6.3027330 | -2.4488660 |
| C  | 1.2925190  | -6.9218990 | 0.0000000  |
| H  | 1.8671060  | -6.6362140 | 0.8863320  |
| H  | 1.1894930  | -8.0123500 | 0.0000000  |
| H  | 1.8671060  | -6.6362140 | -0.8863320 |
| C  | -1.3597060 | -6.5912410 | 1.5426890  |
| H  | -0.8185260 | -6.3027330 | 2.4488660  |
| H  | -2.3413660 | -6.1083960 | 1.5630850  |
| H  | -1.5139410 | -7.6753410 | 1.5700290  |
| C  | 5.5997850  | 3.9193330  | 0.0000000  |
| H  | 5.0630040  | 4.2706660  | -0.8864440 |
| H  | 5.0630040  | 4.2706660  | 0.8864440  |
| H  | 6.5927830  | 4.3815310  | 0.0000000  |
| C  | 6.6564870  | 1.4640890  | 1.5421180  |
| H  | 6.1356270  | 1.7860190  | 2.4489450  |
| H  | 6.7363740  | 0.3729890  | 1.5635300  |
| H  | 7.6700950  | 1.8785380  | 1.5676390  |
| C  | 6.6564870  | 1.4640890  | -1.5421180 |
| H  | 6.7363740  | 0.3729890  | -1.5635300 |
| H  | 6.1356270  | 1.7860190  | -2.4489450 |
| H  | 7.6700950  | 1.8785380  | -1.5676390 |

**HDMI 7 — K\* ( $S_j$ ) —  $G = -1717.303952$  au.**

|   |            |            |           |
|---|------------|------------|-----------|
| C | -1.9431730 | 1.4783670  | 0.0000000 |
| C | -1.9740780 | 3.0059360  | 0.0000000 |
| C | -3.4702290 | 3.2639510  | 0.0000000 |
| C | -4.1826520 | 4.4492580  | 0.0000000 |
| C | -5.5816580 | 4.3943730  | 0.0000000 |
| C | -6.2470250 | 3.1636050  | 0.0000000 |
| C | -5.5470030 | 1.9603190  | 0.0000000 |
| C | -4.1538730 | 2.0388060  | 0.0000000 |
| H | -3.6705480 | 5.4081510  | 0.0000000 |
| H | -6.1562240 | 5.3145480  | 0.0000000 |
| H | -7.3322280 | 3.1437800  | 0.0000000 |
| H | -6.0583410 | 1.0036880  | 0.0000000 |
| C | -0.8115900 | 0.6108420  | 0.0000000 |
| C | 0.4907180  | 1.0950060  | 0.0000000 |
| C | -1.0063080 | -0.8698370 | 0.0000000 |
| C | 1.6315580  | 0.2333380  | 0.0000000 |
| H | 0.6833160  | 2.1596440  | 0.0000000 |
| C | 0.1852880  | -1.7083260 | 0.0000000 |
| C | 1.4742130  | -1.1540020 | 0.0000000 |
| C | -1.3423690 | 3.6104000  | 1.2719170 |
| H | -0.2652270 | 3.4352340  | 1.3173850 |
| H | -1.5113190 | 4.6918620  | 1.2772440 |
| H | -1.8016010 | 3.1848420  | 2.1680890 |

|    |            |            |            |
|----|------------|------------|------------|
| C  | -1.3423690 | 3.6104000  | -1.2719170 |
| H  | -1.5113190 | 4.6918620  | -1.2772440 |
| H  | -0.2652270 | 3.4352340  | -1.3173850 |
| H  | -1.8016010 | 3.1848420  | -2.1680890 |
| O  | -2.1436770 | -1.3751350 | 0.0000000  |
| H  | -3.3990210 | 0.0165570  | 0.0000000  |
| N  | -3.2235550 | 1.0220040  | 0.0000000  |
| H  | 2.3435040  | -1.8014870 | 0.0000000  |
| C  | 0.0007980  | -3.1098800 | 0.0000000  |
| C  | -0.1392020 | -4.3254280 | 0.0000000  |
| C  | 2.9278880  | 0.8109630  | 0.0000000  |
| C  | 4.0384530  | 1.3204740  | 0.0000000  |
| Si | -0.3797900 | -6.1552910 | 0.0000000  |
| Si | 5.7279750  | 2.0819590  | 0.0000000  |
| C  | -1.3423690 | -6.6346460 | -1.5405160 |
| H  | -1.5039570 | -7.7180120 | -1.5603870 |
| H  | -2.3206450 | -6.1451030 | -1.5627020 |
| H  | -0.8000680 | -6.3555550 | -2.4489010 |
| C  | 1.3076270  | -6.9796320 | 0.0000000  |
| H  | 1.8850800  | -6.6997420 | 0.8863100  |
| H  | 1.1938670  | -8.0690740 | 0.0000000  |
| H  | 1.8850800  | -6.6997420 | -0.8863100 |
| C  | -1.3423690 | -6.6346460 | 1.5405160  |
| H  | -0.8000680 | -6.3555550 | 2.4489010  |
| H  | -2.3206450 | -6.1451030 | 1.5627020  |
| H  | -1.5039570 | -7.7180120 | 1.5603870  |
| C  | 5.5281120  | 3.9476930  | 0.0000000  |
| H  | 4.9841570  | 4.2871950  | -0.8865870 |
| H  | 4.9841570  | 4.2871950  | 0.8865870  |
| H  | 6.5111170  | 4.4306750  | 0.0000000  |
| C  | 6.6272910  | 1.5075020  | 1.5440290  |
| H  | 6.0991910  | 1.8203940  | 2.4496690  |
| H  | 6.7233900  | 0.4177990  | 1.5628940  |
| H  | 7.6342300  | 1.9376900  | 1.5721080  |
| C  | 6.6272910  | 1.5075020  | -1.5440290 |
| H  | 6.7233900  | 0.4177990  | -1.5628940 |
| H  | 6.0991910  | 1.8203940  | -2.4496690 |
| H  | 7.6342300  | 1.9376900  | -1.5721080 |

**HBI 8** — E ( $S_0$ ) —  $G = -1654.945442$  au.

|   |            |            |            |
|---|------------|------------|------------|
| C | -1.9311520 | -1.9259970 | 0.0002030  |
| C | -2.9981030 | -3.8677930 | -0.0000170 |
| C | -3.4133820 | -5.1999800 | -0.0001450 |
| C | -4.7823560 | -5.4223730 | -0.0003040 |
| C | -5.7055520 | -4.3574360 | -0.0003330 |
| C | -5.2864050 | -3.0368220 | -0.0002050 |
| C | -3.9083760 | -2.7933880 | -0.0000450 |
| H | -2.7024940 | -6.0191030 | -0.0001240 |
| H | -5.1521410 | -6.4425040 | -0.0004090 |
| H | -6.7673210 | -4.5809740 | -0.0004620 |
| H | -5.9914740 | -2.2124030 | -0.0002290 |
| C | -0.8514530 | -0.9379980 | 0.0003390  |
| C | 0.4903320  | -1.3190680 | 0.0005000  |
| C | -1.1856400 | 0.4374910  | 0.0002690  |
| C | 1.5174950  | -0.3727480 | 0.0005800  |
| H | 0.7630370  | -2.3694420 | 0.0005560  |
| C | -0.1491460 | 1.3992820  | 0.0003450  |
| C | 1.1813860  | 0.9874280  | 0.0005000  |
| O | -2.4417890 | 0.8807930  | 0.0001240  |
| H | -3.0551150 | 0.0919950  | 0.0000860  |
| N | -3.2107010 | -1.6013650 | 0.0000940  |

|    |            |            |            |
|----|------------|------------|------------|
| H  | 1.9660760  | 1.7362280  | 0.0005410  |
| C  | -0.4812870 | 2.7918080  | 0.0002320  |
| C  | -0.7473290 | 3.9797220  | 0.0001190  |
| C  | 2.8892870  | -0.7873100 | 0.0006630  |
| C  | 4.0545390  | -1.1412690 | 0.0006490  |
| Si | -1.1597030 | 5.7831440  | -0.0000880 |
| Si | 5.8253400  | -1.6768190 | -0.0000410 |
| C  | -2.1628240 | 6.1620510  | 1.5407740  |
| H  | -2.4247400 | 7.2252570  | 1.5683730  |
| H  | -3.0912410 | 5.5833520  | 1.5590420  |
| H  | -1.5971360 | 5.9284520  | 2.4477810  |
| C  | 0.4476160  | 6.7537680  | 0.0037720  |
| H  | 1.0492860  | 6.5258370  | -0.8813140 |
| H  | 0.2385200  | 7.8289220  | 0.0037330  |
| H  | 1.0454550  | 6.5251460  | 0.8912720  |
| C  | -2.1561060 | 6.1632870  | -1.5450140 |
| H  | -1.5864600 | 5.9304770  | -2.4497440 |
| H  | -3.0844210 | 5.5845850  | -1.5678180 |
| H  | -2.4179320 | 7.2265100  | -1.5728540 |
| C  | 6.9020600  | -0.1446570 | -0.1280470 |
| H  | 6.6954150  | 0.4073750  | -1.0499160 |
| H  | 6.7340120  | 0.5284830  | 0.7180710  |
| H  | 7.9603570  | -0.4267610 | -0.1318180 |
| C  | 6.1696930  | -2.5950330 | 1.6012630  |
| H  | 5.9947020  | -1.9535770 | 2.4702570  |
| H  | 5.5314930  | -3.4789280 | 1.6953550  |
| H  | 7.2133040  | -2.9264340 | 1.6288420  |
| C  | 6.1034700  | -2.8050770 | -1.4749070 |
| H  | 5.4639820  | -3.6914080 | -1.4211750 |
| H  | 5.8903650  | -2.2868550 | -2.4147280 |
| H  | 7.1457180  | -3.1408130 | -1.5014870 |
| N  | -1.7492860 | -3.2793410 | 0.0001480  |
| H  | -0.8665530 | -3.7706910 | 0.0001610  |

**HBI 8** —  $E^*(S_i)$  —  $G = -1654.812245$  au.

|    |            |            |            |
|----|------------|------------|------------|
| C  | -1.7182110 | -2.0802100 | 0.0004070  |
| C  | -2.7570870 | -4.0551330 | -0.0001030 |
| C  | -3.1431960 | -5.3928740 | -0.0004290 |
| C  | -4.5118380 | -5.6519670 | -0.0006920 |
| C  | -5.4598820 | -4.6100220 | -0.0006300 |
| C  | -5.0788180 | -3.2759670 | -0.0003070 |
| C  | -3.7037470 | -2.9888050 | -0.0000410 |
| H  | -2.4119250 | -6.1937860 | -0.0004780 |
| H  | -4.8555070 | -6.6811470 | -0.0009520 |
| H  | -6.5158330 | -4.8609560 | -0.0008450 |
| H  | -5.8068980 | -2.4722840 | -0.0002670 |
| C  | -0.7125930 | -1.0944850 | 0.0006870  |
| C  | 0.6763940  | -1.3570750 | 0.0009290  |
| C  | -1.1445300 | 0.3045380  | 0.0006130  |
| C  | 1.5981680  | -0.2918170 | 0.0009290  |
| H  | 1.0513310  | -2.3735020 | 0.0010590  |
| C  | -0.1928850 | 1.3718320  | 0.0006820  |
| C  | 1.1808510  | 1.0584690  | 0.0008430  |
| O  | -2.4060830 | 0.6012180  | 0.0004460  |
| N  | -3.0454960 | -1.7993270 | 0.0002760  |
| H  | 1.9170710  | 1.8522390  | 0.0008220  |
| C  | -0.6668530 | 2.7029060  | 0.0004610  |
| C  | -1.0597810 | 3.8621050  | 0.0002220  |
| C  | 2.9905070  | -0.5763490 | 0.0007940  |
| C  | 4.1874330  | -0.8199790 | 0.0004430  |
| Si | -1.6685300 | 5.6040830  | -0.0002810 |

|    |            |            |            |
|----|------------|------------|------------|
| Si | 6.0070500  | -1.1847600 | -0.0003710 |
| C  | -2.7100620 | 5.8815160  | 1.5389540  |
| H  | -3.0929670 | 6.9078750  | 1.5535350  |
| H  | -3.5657100 | 5.1999970  | 1.5647910  |
| H  | -2.1216610 | 5.7256620  | 2.4481360  |
| C  | -0.1805800 | 6.7504390  | 0.0006650  |
| H  | 0.4417970  | 6.5918980  | -0.8852420 |
| H  | -0.5104970 | 7.7949410  | 0.0003590  |
| H  | 0.4405850  | 6.5920300  | 0.8874440  |
| C  | -2.7079350 | 5.8813700  | -1.5409810 |
| H  | -2.1182900 | 5.7253860  | -2.4493350 |
| H  | -3.5635750 | 5.1998840  | -1.5679170 |
| H  | -3.0907730 | 6.9077450  | -1.5562070 |
| C  | 6.9282020  | 0.4472620  | -0.0764800 |
| H  | 6.6743120  | 1.0021730  | -0.9846160 |
| H  | 6.6902360  | 1.0759880  | 0.7867250  |
| H  | 8.0087650  | 0.2688700  | -0.0787420 |
| C  | 6.4091890  | -2.1109050 | 1.5815420  |
| H  | 6.1655170  | -1.5117440 | 2.4638680  |
| H  | 5.8537130  | -3.0515550 | 1.6415480  |
| H  | 7.4786160  | -2.3451320 | 1.6148430  |
| C  | 6.3822750  | -2.2395020 | -1.5065170 |
| H  | 5.8277610  | -3.1821780 | -1.4772460 |
| H  | 6.1209130  | -1.7163700 | -2.4311250 |
| H  | 7.4513520  | -2.4751830 | -1.5403720 |
| N  | -1.5245540 | -3.4485440 | 0.0002110  |
| H  | -0.6323610 | -3.9216100 | 0.0000450  |
| H  | -2.9663580 | -0.2964900 | 0.0003610  |

**HBI 8 — K\* ( $S_I$ ) —  $G = -1654.831304$  au.**

|    |            |            |            |
|----|------------|------------|------------|
| C  | -2.6664210 | -0.2927800 | 0.0064580  |
| C  | -4.7533390 | -1.1661150 | -0.0199960 |
| C  | -5.8803260 | -1.9808030 | -0.0457700 |
| C  | -7.1213030 | -1.3434980 | -0.0322500 |
| C  | -7.2281520 | 0.0531130  | 0.0054810  |
| C  | -6.1007540 | 0.8729610  | 0.0307270  |
| C  | -4.8594570 | 0.2412250  | 0.0169850  |
| H  | -5.7937770 | -3.0610080 | -0.0750480 |
| H  | -8.0235100 | -1.9454890 | -0.0513320 |
| H  | -8.2121190 | 0.5099100  | 0.0151230  |
| H  | -6.1797840 | 1.9536770  | 0.0591840  |
| C  | -1.2551250 | -0.2032740 | 0.0146380  |
| C  | -0.4357160 | -1.3348020 | 0.0202030  |
| C  | -0.6301060 | 1.1453350  | 0.0170260  |
| C  | 0.9828790  | -1.2114090 | 0.0097650  |
| H  | -0.8527990 | -2.3357470 | 0.0355910  |
| C  | 0.8241860  | 1.2178640  | 0.0087640  |
| C  | 1.6023200  | 0.0462730  | 0.0029140  |
| O  | -1.3378990 | 2.1672870  | 0.0262300  |
| N  | -3.5762860 | 0.7313980  | 0.0324340  |
| H  | 2.6838150  | 0.1145780  | -0.0060680 |
| C  | 1.4203070  | 2.4969200  | 0.0037990  |
| C  | 1.9539720  | 3.5996230  | -0.0009180 |
| C  | 1.7767140  | -2.3894750 | 0.0061270  |
| C  | 2.4514940  | -3.4078490 | 0.0022830  |
| Si | 2.7323350  | 5.2687420  | -0.0096570 |
| Si | 3.4839870  | -4.9457950 | -0.0011520 |
| C  | 2.1949670  | 6.2029760  | 1.5307780  |
| H  | 2.6372610  | 7.2053500  | 1.5366970  |
| H  | 1.1067630  | 6.3123020  | 1.5661240  |
| H  | 2.5154230  | 5.6850680  | 2.4397900  |

|   |            |            |            |
|---|------------|------------|------------|
| C | 4.5998900  | 5.0608530  | -0.0232400 |
| H | 4.9308340  | 4.5130990  | -0.9108590 |
| H | 5.0880720  | 6.0414680  | -0.0289320 |
| H | 4.9442050  | 4.5167170  | 0.8615110  |
| C | 2.1720740  | 6.1969720  | -1.5455790 |
| H | 2.4791250  | 5.6755760  | -2.4572180 |
| H | 1.0834480  | 6.3060490  | -1.5652430 |
| H | 2.6140890  | 7.1993530  | -1.5619060 |
| C | 5.1506640  | -4.5313260 | -0.7573130 |
| H | 5.0409280  | -4.1767550 | -1.7865480 |
| H | 5.6634380  | -3.7552990 | -0.1811120 |
| H | 5.7888980  | -5.4212980 | -0.7711120 |
| C | 3.6843720  | -5.5193590 | 1.7753830  |
| H | 4.1804660  | -4.7570590 | 2.3834570  |
| H | 2.7151280  | -5.7432570 | 2.2309040  |
| H | 4.2933130  | -6.4292720 | 1.8079950  |
| C | 2.5936610  | -6.2469450 | -1.0199860 |
| H | 1.6108270  | -6.4759750 | -0.5970850 |
| H | 2.4529300  | -5.9133510 | -2.0524660 |
| H | 3.1783440  | -7.1729110 | -1.0394660 |
| N | -3.4044010 | -1.4537190 | -0.0224640 |
| H | -3.0109200 | -2.3825610 | -0.0698910 |
| H | -3.2557040 | 1.6946530  | 0.0519350  |

**HBI 8** —  $TS^*(S_i)$  —  $G = -1654.813707$  au,  $v = 556.5$  i  $\text{cm}^{-1}$

|    |            |            |            |
|----|------------|------------|------------|
| C  | -1.7029020 | -2.0898940 | 0.0001110  |
| C  | -2.8037920 | -4.0325790 | -0.0006320 |
| C  | -3.2253680 | -5.3589870 | -0.0011390 |
| C  | -4.6007670 | -5.5829200 | -0.0010690 |
| C  | -5.5196570 | -4.5177430 | -0.0005120 |
| C  | -5.1028340 | -3.1929010 | -0.0000110 |
| C  | -3.7226610 | -2.9449880 | -0.0000680 |
| H  | -2.5149790 | -6.1784310 | -0.0015600 |
| H  | -4.9707020 | -6.6028960 | -0.0014470 |
| H  | -6.5820740 | -4.7395310 | -0.0004680 |
| H  | -5.8096290 | -2.3705370 | 0.0004330  |
| C  | -0.6895710 | -1.1118970 | 0.0005170  |
| C  | 0.6956500  | -1.3717120 | 0.0001440  |
| C  | -1.1332600 | 0.2891000  | 0.0013340  |
| C  | 1.6170750  | -0.3019380 | 0.0007500  |
| H  | 1.0738400  | -2.3872260 | -0.0006250 |
| C  | -0.1770790 | 1.3576940  | 0.0020850  |
| C  | 1.1971540  | 1.0462860  | 0.0017900  |
| O  | -2.3898360 | 0.5673090  | 0.0013490  |
| N  | -3.0234940 | -1.7759660 | 0.0003620  |
| H  | 1.9322250  | 1.8411870  | 0.0022530  |
| C  | -0.6519540 | 2.6874720  | 0.0025670  |
| C  | -1.0469120 | 3.8463330  | 0.0029720  |
| C  | 3.0091150  | -0.5860480 | 0.0002790  |
| C  | 4.2059680  | -0.8302760 | -0.0000840 |
| Si | -1.6605960 | 5.5863670  | -0.0000640 |
| Si | 6.0255650  | -1.1952180 | -0.0003140 |
| C  | -2.9778530 | 5.7624310  | 1.3276830  |
| H  | -3.3693570 | 6.7855900  | 1.3353270  |
| H  | -3.8144770 | 5.0808520  | 1.1465530  |
| H  | -2.5707480 | 5.5471670  | 2.3201590  |
| C  | -0.2120240 | 6.7274710  | 0.3562700  |
| H  | 0.5713050  | 6.6210160  | -0.4003360 |
| H  | -0.5457700 | 7.7707640  | 0.3533780  |
| H  | 0.2278000  | 6.5154380  | 1.3354640  |
| C  | -2.3919950 | 5.9700990  | -1.6881060 |

|   |            |            |            |
|---|------------|------------|------------|
| H | -1.6406070 | 5.8703840  | -2.4771550 |
| H | -3.2229390 | 5.2972560  | -1.9205770 |
| H | -2.7715290 | 6.9976740  | -1.7079160 |
| C | 6.9467840  | 0.4373960  | 0.0571710  |
| H | 6.7063900  | 1.0572820  | -0.8117430 |
| H | 6.6951590  | 1.0015010  | 0.9602490  |
| H | 8.0273890  | 0.2593090  | 0.0583390  |
| C | 6.4042410  | -2.2352500 | 1.5149400  |
| H | 6.1448480  | -1.7032310 | 2.4350250  |
| H | 5.8495720  | -3.1781000 | 1.4959350  |
| H | 7.4733500  | -2.4707590 | 1.5487910  |
| C | 6.4236370  | -2.1368430 | -1.5739830 |
| H | 5.8667640  | -3.0772560 | -1.6239300 |
| H | 6.1790150  | -1.5459020 | -2.4615700 |
| H | 7.4926490  | -2.3729410 | -1.6072280 |
| N | -1.5518850 | -3.4606720 | -0.0005260 |
| H | -0.6742360 | -3.9601730 | -0.0007030 |
| H | -2.9624610 | -0.3983620 | 0.0009370  |

**HBO 9** — E( $S_0$ ) —  $G = -1674.805518$  au.

|    |            |            |            |
|----|------------|------------|------------|
| C  | 2.7323390  | 0.0279910  | 0.0000000  |
| C  | 4.7191930  | 0.8691280  | 0.0000000  |
| C  | 5.8235920  | 1.7037870  | 0.0000000  |
| C  | 7.0580720  | 1.0595740  | 0.0000000  |
| C  | 7.1614360  | -0.3422240 | 0.0000000  |
| C  | 6.0365160  | -1.1590380 | 0.0000000  |
| C  | 4.7948840  | -0.5244260 | 0.0000000  |
| H  | 5.7288780  | 2.7831280  | 0.0000000  |
| H  | 7.9636230  | 1.6567770  | 0.0000000  |
| H  | 8.1467940  | -0.7960050 | 0.0000000  |
| H  | 6.1122840  | -2.2405740 | 0.0000000  |
| C  | 1.2780170  | 0.0376490  | 0.0000000  |
| C  | 0.5750960  | 1.2437060  | 0.0000000  |
| C  | 0.5854180  | -1.1928280 | 0.0000000  |
| C  | -0.8199520 | 1.2572620  | 0.0000000  |
| H  | 1.1250860  | 2.1785640  | 0.0000000  |
| C  | -0.8275040 | -1.1812520 | 0.0000000  |
| C  | -1.5076720 | 0.0345590  | 0.0000000  |
| O  | 1.1978220  | -2.3781140 | 0.0000000  |
| H  | 2.1773670  | -2.2413040 | 0.0000000  |
| N  | 3.4945500  | -1.0246570 | 0.0000000  |
| H  | -2.5923840 | 0.0291750  | 0.0000000  |
| C  | -1.5439320 | -2.4204530 | 0.0000000  |
| C  | -2.1670460 | -3.4660370 | 0.0000000  |
| C  | -1.5399910 | 2.4966340  | 0.0000000  |
| C  | -2.1545940 | 3.5477420  | 0.0000000  |
| Si | -3.0982450 | -5.0656750 | 0.0000000  |
| Si | -3.0919060 | 5.1433080  | 0.0000000  |
| C  | -2.6249030 | -6.0235310 | 1.5434480  |
| H  | -3.1566260 | -6.9807410 | 1.5709320  |
| H  | -1.5508880 | -6.2313840 | 1.5649530  |
| H  | -2.8830670 | -5.4661790 | 2.4489400  |
| C  | -4.9347120 | -4.6766370 | 0.0000000  |
| H  | -5.2167500 | -4.1003490 | -0.8863590 |
| H  | -5.5164020 | -5.6046780 | 0.0000000  |
| H  | -5.2167500 | -4.1003490 | 0.8863590  |
| C  | -2.6249030 | -6.0235310 | -1.5434480 |
| H  | -2.8830670 | -5.4661790 | -2.4489400 |
| H  | -1.5508880 | -6.2313840 | -1.5649530 |
| H  | -3.1566260 | -6.9807410 | -1.5709320 |
| C  | -4.9261850 | 4.7444080  | 0.0000000  |

|   |            |           |            |
|---|------------|-----------|------------|
| H | -5.2049140 | 4.1664800 | -0.8863250 |
| H | -5.2049140 | 4.1664800 | 0.8863250  |
| H | -5.5130110 | 5.6692010 | 0.0000000  |
| C | -2.6249030 | 6.1059730 | 1.5427410  |
| H | -2.8784390 | 5.5473970 | 2.4488010  |
| H | -1.5526450 | 6.3230940 | 1.5642720  |
| H | -3.1641720 | 7.0589700 | 1.5697840  |
| C | -2.6249030 | 6.1059730 | -1.5427410 |
| H | -1.5526450 | 6.3230940 | -1.5642720 |
| H | -2.8784390 | 5.5473970 | -2.4488010 |
| H | -3.1641720 | 7.0589700 | -1.5697840 |
| O | 3.3925350  | 1.2118990 | 0.0000000  |

**HBO 9 —  $E^*(S_j)$  —  $G = -1674.674508$  au.**

|    |            |            |            |
|----|------------|------------|------------|
| C  | 2.6916390  | 0.0522890  | 0.0000000  |
| C  | 4.7515090  | 0.7356410  | 0.0000000  |
| C  | 5.9130240  | 1.4794010  | 0.0000000  |
| C  | 7.1059480  | 0.7478510  | 0.0000000  |
| C  | 7.1046600  | -0.6568330 | 0.0000000  |
| C  | 5.9251870  | -1.3933340 | 0.0000000  |
| C  | 4.7201080  | -0.6764420 | 0.0000000  |
| H  | 5.8964820  | 2.5629800  | 0.0000000  |
| H  | 8.0516700  | 1.2790160  | 0.0000000  |
| H  | 8.0547980  | -1.1813210 | 0.0000000  |
| H  | 5.9262320  | -2.4774180 | 0.0000000  |
| C  | 1.2912200  | 0.1382000  | 0.0000000  |
| C  | 0.5686140  | 1.3452000  | 0.0000000  |
| C  | 0.5368750  | -1.1164340 | 0.0000000  |
| C  | -0.8426700 | 1.3255610  | 0.0000000  |
| H  | 1.0957600  | 2.2909890  | 0.0000000  |
| C  | -0.8887480 | -1.1162740 | 0.0000000  |
| C  | -1.5729590 | 0.1151880  | 0.0000000  |
| O  | 1.1577330  | -2.2589490 | 0.0000000  |
| H  | 2.1749330  | -2.0985300 | 0.0000000  |
| N  | 3.4144390  | -1.0773140 | 0.0000000  |
| H  | -2.6551730 | 0.1329130  | 0.0000000  |
| C  | -1.5683120 | -2.3568960 | 0.0000000  |
| C  | -2.1732590 | -3.4196010 | 0.0000000  |
| C  | -1.5512540 | 2.5547650  | 0.0000000  |
| C  | -2.1608980 | 3.6137450  | 0.0000000  |
| Si | -3.0706360 | -5.0366320 | 0.0000000  |
| Si | -3.0787320 | 5.2293870  | 0.0000000  |
| C  | -2.5786760 | -5.9892550 | 1.5418680  |
| H  | -3.0877400 | -6.9590500 | 1.5617360  |
| H  | -1.5001400 | -6.1717310 | 1.5658200  |
| H  | -2.8534310 | -5.4429230 | 2.4490810  |
| C  | -4.9146040 | -4.6848680 | 0.0000000  |
| H  | -5.2087050 | -4.1148970 | -0.8864620 |
| H  | -5.4762900 | -5.6251920 | 0.0000000  |
| H  | -5.2087050 | -4.1148970 | 0.8864620  |
| C  | -2.5786760 | -5.9892550 | -1.5418680 |
| H  | -2.8534310 | -5.4429230 | -2.4490810 |
| H  | -1.5001400 | -6.1717310 | -1.5658200 |
| H  | -3.0877400 | -6.9590500 | -1.5617360 |
| C  | -4.9157810 | 4.8542320  | 0.0000000  |
| H  | -5.2017850 | 4.2805490  | -0.8866050 |
| H  | -5.2017850 | 4.2805490  | 0.8866050  |
| H  | -5.4893390 | 5.7871980  | 0.0000000  |
| C  | -2.5786760 | 6.1657280  | 1.5468070  |
| H  | -2.8416400 | 5.6072220  | 2.4499740  |
| H  | -1.5014930 | 6.3561330  | 1.5623740  |

|   |            |           |            |
|---|------------|-----------|------------|
| H | -3.0952450 | 7.1308520 | 1.5818400  |
| C | -2.5786760 | 6.1657280 | -1.5468070 |
| H | -1.5014930 | 6.3561330 | -1.5623740 |
| H | -2.8416400 | 5.6072220 | -2.4499740 |
| H | -3.0952450 | 7.1308520 | -1.5818400 |
| O | 3.4619910  | 1.1881550 | 0.0000000  |

**HBO 9 — K\* ( $S_l$ ) —  $G = -1674.689226$  au.**

|    |            |            |            |
|----|------------|------------|------------|
| C  | 2.6777580  | 0.0656150  | 0.0000000  |
| C  | 4.7167810  | 0.8956240  | 0.0000000  |
| C  | 5.8007820  | 1.7481090  | 0.0000000  |
| C  | 7.0593490  | 1.1362650  | 0.0000000  |
| C  | 7.1954200  | -0.2567670 | 0.0000000  |
| C  | 6.0902500  | -1.1086940 | 0.0000000  |
| C  | 4.8383450  | -0.5002420 | 0.0000000  |
| H  | 5.6756320  | 2.8241830  | 0.0000000  |
| H  | 7.9476190  | 1.7581920  | 0.0000000  |
| H  | 8.1900000  | -0.6898740 | 0.0000000  |
| H  | 6.1963380  | -2.1869660 | 0.0000000  |
| C  | 1.2688090  | 0.0692750  | 0.0000000  |
| C  | 0.5414880  | 1.2529210  | 0.0000000  |
| C  | 0.5666760  | -1.2385010 | 0.0000000  |
| C  | -0.8876990 | 1.2272600  | 0.0000000  |
| H  | 1.0507140  | 2.2099850  | 0.0000000  |
| C  | -0.8854680 | -1.2091520 | 0.0000000  |
| C  | -1.5846940 | 0.0144200  | 0.0000000  |
| O  | 1.2184240  | -2.2979950 | 0.0000000  |
| N  | 3.5474290  | -0.9780680 | 0.0000000  |
| H  | -2.6684170 | 0.0145840  | 0.0000000  |
| C  | -1.5716570 | -2.4427750 | 0.0000000  |
| C  | -2.1830940 | -3.5035950 | 0.0000000  |
| C  | -1.5959010 | 2.4574560  | 0.0000000  |
| C  | -2.1947320 | 3.5223950  | 0.0000000  |
| Si | -3.0855310 | -5.1120010 | 0.0000000  |
| Si | -3.1012510 | 5.1388720  | 0.0000000  |
| C  | -2.6047630 | -6.0760080 | 1.5397220  |
| H  | -3.1205170 | -7.0424690 | 1.5543770  |
| H  | -1.5275160 | -6.2659280 | 1.5660450  |
| H  | -2.8778380 | -5.5317100 | 2.4487360  |
| C  | -4.9308100 | -4.7608960 | 0.0000000  |
| H  | -5.2251190 | -4.1906230 | -0.8862850 |
| H  | -5.4930480 | -5.7009830 | 0.0000000  |
| H  | -5.2251190 | -4.1906230 | 0.8862850  |
| C  | -2.6047630 | -6.0760080 | -1.5397220 |
| H  | -2.8778380 | -5.5317100 | -2.4487360 |
| H  | -1.5275160 | -6.2659280 | -1.5660450 |
| H  | -3.1205170 | -7.0424690 | -1.5543770 |
| C  | -4.9424470 | 4.7787720  | 0.0000000  |
| H  | -5.2331360 | 4.2070730  | -0.8864320 |
| H  | -5.2331360 | 4.2070730  | 0.8864320  |
| H  | -5.5090260 | 5.7160700  | 0.0000000  |
| C  | -2.6047630 | 6.0833960  | 1.5442390  |
| H  | -2.8716050 | 5.5298770  | 2.4494370  |
| H  | -1.5270930 | 6.2714390  | 1.5630820  |
| H  | -3.1187340 | 7.0501860  | 1.5735370  |
| C  | -2.6047630 | 6.0833960  | -1.5442390 |
| H  | -1.5270930 | 6.2714390  | -1.5630820 |
| H  | -2.8716050 | 5.5298770  | -2.4494370 |
| H  | -3.1187340 | 7.0501860  | -1.5735370 |
| O  | 3.3863020  | 1.2266320  | 0.0000000  |
| H  | 3.1978100  | -1.9333060 | 0.0000000  |



**HBO 9** — TS\* ( $S_i$ ) —  $G = -1674.676057$  au,  $v = 1127.0$  i cm<sup>-1</sup>

|    |            |            |            |
|----|------------|------------|------------|
| C  | 2.6839460  | 0.0848950  | 0.0000000  |
| C  | 4.7907770  | 0.6144750  | 0.0000000  |
| C  | 5.9965050  | 1.2830570  | 0.0000000  |
| C  | 7.1422500  | 0.4789110  | 0.0000000  |
| C  | 7.0529800  | -0.9204400 | 0.0000000  |
| C  | 5.8280540  | -1.5831770 | 0.0000000  |
| C  | 4.6757630  | -0.7911720 | 0.0000000  |
| H  | 6.0464220  | 2.3655680  | 0.0000000  |
| H  | 8.1188010  | 0.9507410  | 0.0000000  |
| H  | 7.9672400  | -1.5050350 | 0.0000000  |
| H  | 5.7620290  | -2.6650050 | 0.0000000  |
| C  | 1.2864130  | 0.1980730  | 0.0000000  |
| C  | 0.5676640  | 1.3980680  | 0.0000000  |
| C  | 0.5451740  | -1.0771150 | 0.0000000  |
| C  | -0.8499780 | 1.3749070  | 0.0000000  |
| H  | 1.0901050  | 2.3471390  | 0.0000000  |
| C  | -0.8878660 | -1.0671650 | 0.0000000  |
| C  | -1.5726980 | 0.1643930  | 0.0000000  |
| O  | 1.1870560  | -2.1868600 | 0.0000000  |
| H  | 2.3346540  | -1.9486190 | 0.0000000  |
| N  | 3.3398710  | -1.0899150 | 0.0000000  |
| H  | -2.6552320 | 0.1800090  | 0.0000000  |
| C  | -1.5696480 | -2.3048770 | 0.0000000  |
| C  | -2.1752190 | -3.3678710 | 0.0000000  |
| C  | -1.5577890 | 2.6043600  | 0.0000000  |
| C  | -2.1638960 | 3.6652890  | 0.0000000  |
| Si | -3.0708880 | -4.9848770 | 0.0000000  |
| Si | -3.0789090 | 5.2818200  | 0.0000000  |
| C  | -2.5787440 | -5.9383910 | 1.5415060  |
| H  | -3.0868230 | -6.9087470 | 1.5603240  |
| H  | -1.5000170 | -6.1196900 | 1.5657710  |
| H  | -2.8544270 | -5.3931150 | 2.4490760  |
| C  | -4.9157420 | -4.6368630 | 0.0000000  |
| H  | -5.2110240 | -4.0674450 | -0.8864380 |
| H  | -5.4756320 | -5.5782740 | 0.0000000  |
| H  | -5.2110240 | -4.0674450 | 0.8864380  |
| C  | -2.5787440 | -5.9383910 | -1.5415060 |
| H  | -2.8544270 | -5.3931150 | -2.4490760 |
| H  | -1.5000170 | -6.1196900 | -1.5657710 |
| H  | -3.0868230 | -6.9087470 | -1.5603240 |
| C  | -4.9167590 | 4.9098410  | 0.0000000  |
| H  | -5.2037340 | 4.3365840  | -0.8865770 |
| H  | -5.2037340 | 4.3365840  | 0.8865770  |
| H  | -5.4888210 | 5.8437350  | 0.0000000  |
| C  | -2.5787440 | 6.2188620  | 1.5464850  |
| H  | -2.8425550 | 5.6611060  | 2.4498860  |
| H  | -1.5013790 | 6.4083090  | 1.5625180  |
| H  | -3.0943630 | 7.1845260  | 1.5808770  |
| C  | -2.5787440 | 6.2188620  | -1.5464850 |
| H  | -1.5013790 | 6.4083090  | -1.5625180 |
| H  | -2.8425550 | 5.6611060  | -2.4498860 |

|   |            |           |            |
|---|------------|-----------|------------|
| H | -3.0943630 | 7.1845260 | -1.5808770 |
| O | 3.5301220  | 1.1553220 | 0.0000000  |

**HBT 10** —  $E(S_0)$  —  $G = -1997.774135$  au.

|    |            |            |            |
|----|------------|------------|------------|
| C  | 2.5685600  | 0.0941120  | 0.0000000  |
| C  | 4.9670640  | 0.6199860  | 0.0000000  |
| C  | 6.2971900  | 1.0411970  | 0.0000000  |
| C  | 7.2854110  | 0.0667710  | 0.0000000  |
| C  | 6.9594470  | -1.2997330 | 0.0000000  |
| C  | 5.6390300  | -1.7171800 | 0.0000000  |
| C  | 4.6310920  | -0.7460690 | 0.0000000  |
| H  | 6.5510010  | 2.0956200  | 0.0000000  |
| H  | 8.3276640  | 0.3680200  | 0.0000000  |
| H  | 7.7548710  | -2.0373940 | 0.0000000  |
| H  | 5.3711400  | -2.7683350 | 0.0000000  |
| C  | 1.1043030  | 0.0991050  | 0.0000000  |
| C  | 0.3882660  | 1.2986750  | 0.0000000  |
| C  | 0.4015110  | -1.1299520 | 0.0000000  |
| C  | -1.0063990 | 1.3165020  | 0.0000000  |
| H  | 0.9199140  | 2.2460490  | 0.0000000  |
| C  | -1.0129150 | -1.1170630 | 0.0000000  |
| C  | -1.6961340 | 0.0956020  | 0.0000000  |
| O  | 1.0049630  | -2.3177410 | 0.0000000  |
| H  | 1.9873260  | -2.1718660 | 0.0000000  |
| N  | 3.2712030  | -1.0005790 | 0.0000000  |
| H  | -2.7807860 | 0.0901980  | 0.0000000  |
| C  | -1.7272360 | -2.3575860 | 0.0000000  |
| C  | -2.3493880 | -3.4038210 | 0.0000000  |
| C  | -1.7224510 | 2.5579120  | 0.0000000  |
| C  | -2.3342390 | 3.6107190  | 0.0000000  |
| Si | -3.2767090 | -5.0052180 | 0.0000000  |
| Si | -3.2693240 | 5.2074730  | 0.0000000  |
| C  | -2.8014130 | -5.9626100 | 1.5432560  |
| H  | -3.3307390 | -6.9211650 | 1.5703330  |
| H  | -1.7268760 | -6.1677710 | 1.5649040  |
| H  | -3.0610750 | -5.4062240 | 2.4489200  |
| C  | -5.1144070 | -4.6216290 | 0.0000000  |
| H  | -5.3981520 | -4.0461550 | -0.8863490 |
| H  | -5.6933920 | -5.5513700 | 0.0000000  |
| H  | -5.3981520 | -4.0461550 | 0.8863490  |
| C  | -2.8014130 | -5.9626100 | -1.5432560 |
| H  | -3.0610750 | -5.4062240 | -2.4489200 |
| H  | -1.7268760 | -6.1677710 | -1.5649040 |
| H  | -3.3307390 | -6.9211650 | -1.5703330 |
| C  | -5.1040850 | 4.8106940  | 0.0000000  |
| H  | -5.3834530 | 4.2330670  | -0.8863190 |
| H  | -5.3834530 | 4.2330670  | 0.8863190  |
| H  | -5.6898690 | 5.7361490  | 0.0000000  |
| C  | -2.8014130 | 6.1698430  | 1.5426790  |
| H  | -3.0555490 | 5.6115940  | 2.4487730  |
| H  | -1.7289490 | 6.3859540  | 1.5642900  |
| H  | -3.3397480 | 7.1233720  | 1.5696160  |
| C  | -2.8014130 | 6.1698430  | -1.5426790 |
| H  | -1.7289490 | 6.3859540  | -1.5642900 |
| H  | -3.0555490 | 5.6115940  | -2.4487730 |
| H  | -3.3397480 | 7.1233720  | -1.5696160 |
| S  | 3.5121070  | 1.5803590  | 0.0000000  |

**HBT 10** —  $E^*(S_1)$  —  $G = -1997.650750$  au.

|   |           |           |           |
|---|-----------|-----------|-----------|
| C | 2.5309010 | 0.1263000 | 0.0000000 |
|---|-----------|-----------|-----------|

|    |            |            |            |
|----|------------|------------|------------|
| C  | 4.9777030  | 0.4498710  | 0.0000000  |
| C  | 6.3289320  | 0.7737230  | 0.0000000  |
| C  | 7.2576180  | -0.2642140 | 0.0000000  |
| C  | 6.8343490  | -1.6047740 | 0.0000000  |
| C  | 5.4914860  | -1.9374500 | 0.0000000  |
| C  | 4.5336490  | -0.9027650 | 0.0000000  |
| H  | 6.6518610  | 1.8095580  | 0.0000000  |
| H  | 8.3174790  | -0.0334790 | 0.0000000  |
| H  | 7.5776420  | -2.3957790 | 0.0000000  |
| H  | 5.1600770  | -2.9703310 | 0.0000000  |
| C  | 1.1240070  | 0.2090420  | 0.0000000  |
| C  | 0.3922580  | 1.4063860  | 0.0000000  |
| C  | 0.3648760  | -1.0517680 | 0.0000000  |
| C  | -1.0188230 | 1.3910600  | 0.0000000  |
| H  | 0.9068770  | 2.3612680  | 0.0000000  |
| C  | -1.0646570 | -1.0456600 | 0.0000000  |
| C  | -1.7455700 | 0.1796110  | 0.0000000  |
| O  | 0.9886210  | -2.1828960 | 0.0000000  |
| H  | 2.0436210  | -1.9817290 | 0.0000000  |
| N  | 3.1876220  | -1.0548380 | 0.0000000  |
| H  | -2.8282170 | 0.1974950  | 0.0000000  |
| C  | -1.7476090 | -2.2872560 | 0.0000000  |
| C  | -2.3506040 | -3.3497420 | 0.0000000  |
| C  | -1.7280780 | 2.6204300  | 0.0000000  |
| C  | -2.3358530 | 3.6800310  | 0.0000000  |
| Si | -3.2465420 | -4.9689060 | 0.0000000  |
| Si | -3.2519630 | 5.2965620  | 0.0000000  |
| C  | -2.7516720 | -5.9181040 | 1.5425970  |
| H  | -3.2593440 | -6.8885290 | 1.5648570  |
| H  | -1.6728550 | -6.0989530 | 1.5655700  |
| H  | -3.0261380 | -5.3705600 | 2.4491720  |
| C  | -5.0906410 | -4.6187940 | 0.0000000  |
| H  | -5.3851740 | -4.0490710 | -0.8864770 |
| H  | -5.6515510 | -5.5595640 | 0.0000000  |
| H  | -5.3851740 | -4.0490710 | 0.8864770  |
| C  | -2.7516720 | -5.9181040 | -1.5425970 |
| H  | -3.0261380 | -5.3705600 | -2.4491720 |
| H  | -1.6728550 | -6.0989530 | -1.5655700 |
| H  | -3.2593440 | -6.8885290 | -1.5648570 |
| C  | -5.0893470 | 4.9227570  | 0.0000000  |
| H  | -5.3758340 | 4.3493220  | -0.8866130 |
| H  | -5.3758340 | 4.3493220  | 0.8866130  |
| H  | -5.6621580 | 5.8561830  | 0.0000000  |
| C  | -2.7516720 | 6.2330430  | 1.5466510  |
| H  | -3.0153280 | 5.6750180  | 2.4499230  |
| H  | -1.6743360 | 6.4226280  | 1.5625740  |
| H  | -3.2673910 | 7.1986360  | 1.5813360  |
| C  | -2.7516720 | 6.2330430  | -1.5466510 |
| H  | -1.6743360 | 6.4226280  | -1.5625740 |
| H  | -3.0153280 | 5.6750180  | -2.4499230 |
| H  | -3.2673910 | 7.1986360  | -1.5813360 |
| S  | 3.6029040  | 1.5337030  | 0.0000000  |

**HBT 10** —  $K^*(S_j)$  —  $G = -1997.665902$  au.

|   |           |            |           |
|---|-----------|------------|-----------|
| C | 2.5199650 | 0.1365110  | 0.0000000 |
| C | 4.9596760 | 0.6690700  | 0.0000000 |
| C | 6.2692980 | 1.1343440  | 0.0000000 |
| C | 7.3003930 | 0.1983110  | 0.0000000 |
| C | 7.0208840 | -1.1754380 | 0.0000000 |
| C | 5.7170480 | -1.6494980 | 0.0000000 |
| C | 4.6775200 | -0.7113830 | 0.0000000 |

|    |            |            |            |
|----|------------|------------|------------|
| H  | 6.4795700  | 2.1985690  | 0.0000000  |
| H  | 8.3300110  | 0.5385900  | 0.0000000  |
| H  | 7.8406160  | -1.8862380 | 0.0000000  |
| H  | 5.4977950  | -2.7115500 | 0.0000000  |
| C  | 1.0983630  | 0.1215410  | 0.0000000  |
| C  | 0.3560080  | 1.2946190  | 0.0000000  |
| C  | 0.3864090  | -1.1853280 | 0.0000000  |
| C  | -1.0709550 | 1.2763350  | 0.0000000  |
| H  | 0.8493020  | 2.2621810  | 0.0000000  |
| C  | -1.0687030 | -1.1527840 | 0.0000000  |
| C  | -1.7677930 | 0.0628550  | 0.0000000  |
| O  | 1.0189130  | -2.2566660 | 0.0000000  |
| N  | 3.3318230  | -0.9595750 | 0.0000000  |
| H  | -2.8517180 | 0.0624290  | 0.0000000  |
| C  | -1.7547690 | -2.3891990 | 0.0000000  |
| C  | -2.3644890 | -3.4497690 | 0.0000000  |
| C  | -1.7770020 | 2.5072690  | 0.0000000  |
| C  | -2.3738820 | 3.5733240  | 0.0000000  |
| Si | -3.2647160 | -5.0609490 | 0.0000000  |
| Si | -3.2778990 | 5.1913610  | 0.0000000  |
| C  | -2.7800050 | -6.0208400 | 1.5405570  |
| H  | -3.2936800 | -6.9883110 | 1.5578230  |
| H  | -1.7023250 | -6.2083360 | 1.5657070  |
| H  | -3.0530380 | -5.4753490 | 2.4488660  |
| C  | -5.1101550 | -4.7120760 | 0.0000000  |
| H  | -5.4050610 | -4.1421600 | -0.8863090 |
| H  | -5.6712780 | -5.6528050 | 0.0000000  |
| H  | -5.4050610 | -4.1421600 | 0.8863090  |
| C  | -2.7800050 | -6.0208400 | -1.5405570 |
| H  | -3.0530380 | -5.4753490 | -2.4488660 |
| H  | -1.7023250 | -6.2083360 | -1.5657070 |
| H  | -3.2936800 | -6.9883110 | -1.5578230 |
| C  | -5.1194830 | 4.8334100  | 0.0000000  |
| H  | -5.4109030 | 4.2621240  | -0.8864530 |
| H  | -5.4109030 | 4.2621240  | 0.8864530  |
| H  | -5.6848280 | 5.7714510  | 0.0000000  |
| C  | -2.7800050 | 6.1352250  | 1.5441820  |
| H  | -3.0480430 | 5.5823960  | 2.4494420  |
| H  | -1.7020200 | 6.3214390  | 1.5632410  |
| H  | -3.2922800 | 7.1029320  | 1.5731020  |
| C  | -2.7800050 | 6.1352250  | -1.5441820 |
| H  | -1.7020200 | 6.3214390  | -1.5632410 |
| H  | -3.0480430 | 5.5823960  | -2.4494420 |
| H  | -3.2922800 | 7.1029320  | -1.5731020 |
| S  | 3.4748230  | 1.6039760  | 0.0000000  |
| H  | 2.8807290  | -1.8764240 | 0.0000000  |

**HBT 10** — TS\* ( $S_j$ ) —  $G = -1997.651719$  au,  $v = 290.5$   $i$   $\text{cm}^{-1}$

|   |           |            |           |
|---|-----------|------------|-----------|
| C | 2.5302100 | 0.1342130  | 0.0000000 |
| C | 4.9827560 | 0.4152320  | 0.0000000 |
| C | 6.3385130 | 0.7192610  | 0.0000000 |
| C | 7.2520270 | -0.3322240 | 0.0000000 |
| C | 6.8092200 | -1.6657880 | 0.0000000 |
| C | 5.4611160 | -1.9789380 | 0.0000000 |
| C | 4.5205200 | -0.9300280 | 0.0000000 |
| H | 6.6764330 | 1.7502790  | 0.0000000 |
| H | 8.3151000 | -0.1169250 | 0.0000000 |
| H | 7.5404870 | -2.4679020 | 0.0000000 |
| H | 5.1148010 | -3.0068950 | 0.0000000 |

|    |            |            |            |
|----|------------|------------|------------|
| C  | 1.1232420  | 0.2231870  | 0.0000000  |
| C  | 0.3937980  | 1.4193060  | 0.0000000  |
| C  | 0.3665860  | -1.0416470 | 0.0000000  |
| C  | -1.0191190 | 1.4043650  | 0.0000000  |
| H  | 0.9085680  | 2.3742450  | 0.0000000  |
| C  | -1.0650500 | -1.0322190 | 0.0000000  |
| C  | -1.7451880 | 0.1935780  | 0.0000000  |
| O  | 0.9944810  | -2.1652780 | 0.0000000  |
| H  | 2.0809260  | -1.9445820 | 0.0000000  |
| N  | 3.1708370  | -1.0570340 | 0.0000000  |
| H  | -2.8278880 | 0.2118970  | 0.0000000  |
| C  | -1.7489040 | -2.2727670 | 0.0000000  |
| C  | -2.3518950 | -3.3354550 | 0.0000000  |
| C  | -1.7271710 | 2.6342320  | 0.0000000  |
| C  | -2.3338780 | 3.6944800  | 0.0000000  |
| Si | -3.2460560 | -4.9553580 | 0.0000000  |
| Si | -3.2499650 | 5.3108620  | 0.0000000  |
| C  | -2.7501380 | -5.9042960 | 1.5424880  |
| H  | -3.2565210 | -6.8754060 | 1.5644550  |
| H  | -1.6710780 | -6.0836920 | 1.5654960  |
| H  | -3.0253930 | -5.3573410 | 2.4491800  |
| C  | -5.0907010 | -4.6079750 | 0.0000000  |
| H  | -5.3860900 | -4.0386860 | -0.8864730 |
| H  | -5.6502310 | -5.5495710 | 0.0000000  |
| H  | -5.3860900 | -4.0386860 | 0.8864730  |
| C  | -2.7501380 | -5.9042960 | -1.5424880 |
| H  | -3.0253930 | -5.3573410 | -2.4491800 |
| H  | -1.6710780 | -6.0836920 | -1.5654960 |
| H  | -3.2565210 | -6.8754060 | -1.5644550 |
| C  | -5.0873430 | 4.9368330  | 0.0000000  |
| H  | -5.3737430 | 4.3633380  | -0.8866040 |
| H  | -5.3737430 | 4.3633380  | 0.8866040  |
| H  | -5.6603150 | 5.8701630  | 0.0000000  |
| C  | -2.7501380 | 6.2477300  | 1.5465960  |
| H  | -3.0136910 | 5.6897030  | 2.4499010  |
| H  | -1.6728690 | 6.4377050  | 1.5626400  |
| H  | -3.2661940 | 7.2131500  | 1.5811510  |
| C  | -2.7501380 | 6.2477300  | -1.5465960 |
| H  | -1.6728690 | 6.4377050  | -1.5626400 |
| H  | -3.0136910 | 5.6897030  | -2.4499010 |
| H  | -3.2661940 | 7.2131500  | -1.5811510 |
| S  | 3.6235470  | 1.5211920  | 0.0000000  |

## S6. References

- [1] O.D. Rigaku, *CrysAlis PRO*, **2022**, Rigaku Oxford Diffraction, Yarnton, England.
- [2] G.M. Sheldrick, *Acta Crystallogr.* **2015**, *C71*, 3–8.
- [3] G.M. Sheldrick, *Acta Crystallogr.*, **2015**, *A71*, 3–8.
- [4] (a) F. Kleemiss, O.V. Dolomanov, M. Bodensteiner, N. Peyerimhoff, M. Midgley, L.J. Bourhis, A. Genoni, L.A. Malaspina, D. Jayatilaka, J.L. Spencer, F. White, B. Grundkötter-Stock, S. Steinhauer, D. Lentz, H. Puschmann, S. Grabowsky, *Chem. Sci.*, **2021**, *12*, 1675–1692. (b) L. Midgley, L.J. Bourhis, O.V. Dolomanov, S. Grabowsky, F. Kleemiss, H. Puschmann, N. Peyerimhoff, *Acta Cryst.* **2021**, *A77*, 519–533.
- [5] O.V. Dolomanov, L.J. Bourhis, R.J. Gildea, J.A.K. Howard, H. Puschmann, *J. Appl. Cryst.* **2009**, *42*, 339–341.
- [6] F. Neese, F. Wennmohs, U. Becker, C. Riplinger, *J. Chem. Phys.*, **2020**, *152*, 224108.
- [7] A.P. Bartók, J.R.J. Yates, *Chem. Phys.* **2019**, *150*, 161101.
- [8] T. H. Dunning Jr., *J. Chem. Phys.*, **1989**, *90*, 1007–1023.
- [9] Y. Zhao, D. G. Truhlar, *Theor. Chem. Acc.* **2008**, *120*, 215–241.
- [10] R. Cammi, B. Mennucci, *J. Chem. Phys.* **1999**, *110*, 9877–9886.
- [11] M. Caricato, B. Mennucci, J. Tomasi, *J. Chem. Phys.* **2006**, *124*, 124520.
- [12] C. A. Guido, A. Chrayteh, G. Scalmani, B. D. Jacquemin *J. Chem. Theory Comput.* **2021**, *17*, 5155–5164.
- [13] M. J. Frisch, et al., Gaussian 16, Revision A.03, Gaussian, Inc., Wallingford CT, 2016.
- [14] O. Christiansen, H. Koch, P. Jorgensen, *Chem. Phys. Lett.* **1995**, *243*, 409–418.
- [15] TURBOMOLE V7.5 2020, a development of University of Karlsruhe and Forschungszentrum Karlsruhe GmbH, 1989 – 2007, TURBOMOLE GmbH, since 2007; available from <http://www.turbomole.com>.
